# Supplementary material for: Reporting quality of clinical trial protocols: a repeated cross-sectional study about the Adherence to SPIrit Recommendations in Switzerland, CAnada and GErmany (ASPIRE-SCAGE)
Source: PubMed Central journal article supplement — BMJ Open. 2022 May 19;12(5):e053417. doi: 10.1136/bmjopen-2021-053417 (PMC9125701; doi:10.1136/bmjopen-2021-053417), 2022-05-19
Supplement: bmjopen-2021-053417.draft_revisions.pdf [file bmjopen-2021-053417.draft_revisions.pdf]

# BMJ Open

BMJ Open is committed to open peer review. As part of this commitment we make the peer review history of every article we publish publicly available.

When an article is published we post the peer reviewers' comments and the authors' responses online. We also post the versions of the paper that were used during peer review. These are the versions that the peer review comments apply to.

The versions of the paper that follow are the versions that were submitted during the peer review process. They are not the versions of record or the final published versions. They should not be cited or distributed as the published version of this manuscript.

BMJ Open is an open access journal and the full, final, typeset and author-corrected version of record of the manuscript is available on our site with no access controls, subscription charges or pay-per-view fees (<http://bmjopen.bmj.com>).

If you have any questions on BMJ Open's open peer review process please email [info.bmjopen@bmj.com](mailto:info.bmjopen@bmj.com)

# BMJ Open

## Reporting quality of clinical trial protocols: a repeated cross sectional study about the Adherence to SPIrit Recommendations in Switzerland, Canada, and Germany (ASPIRE-SCAGE)

|                               |                                                                                                                                                                                                                                                                                                                                                                                                                                                                                                                                                                                                                                                                                                                                                                                                                                                                                                                                                                                                                                                                                                                                                                                                                                                                                                                                                                                                                                                                                                                                                                                                                                                                                                                                                                                                                                                                                                                                                                                                                                                                                                                                                                                                                                                                                                                                                                                                         |
|-------------------------------|---------------------------------------------------------------------------------------------------------------------------------------------------------------------------------------------------------------------------------------------------------------------------------------------------------------------------------------------------------------------------------------------------------------------------------------------------------------------------------------------------------------------------------------------------------------------------------------------------------------------------------------------------------------------------------------------------------------------------------------------------------------------------------------------------------------------------------------------------------------------------------------------------------------------------------------------------------------------------------------------------------------------------------------------------------------------------------------------------------------------------------------------------------------------------------------------------------------------------------------------------------------------------------------------------------------------------------------------------------------------------------------------------------------------------------------------------------------------------------------------------------------------------------------------------------------------------------------------------------------------------------------------------------------------------------------------------------------------------------------------------------------------------------------------------------------------------------------------------------------------------------------------------------------------------------------------------------------------------------------------------------------------------------------------------------------------------------------------------------------------------------------------------------------------------------------------------------------------------------------------------------------------------------------------------------------------------------------------------------------------------------------------------------|
| Journal:                      | <i>BMJ Open</i>                                                                                                                                                                                                                                                                                                                                                                                                                                                                                                                                                                                                                                                                                                                                                                                                                                                                                                                                                                                                                                                                                                                                                                                                                                                                                                                                                                                                                                                                                                                                                                                                                                                                                                                                                                                                                                                                                                                                                                                                                                                                                                                                                                                                                                                                                                                                                                                         |
| Manuscript ID                 | bmjopen-2021-053417                                                                                                                                                                                                                                                                                                                                                                                                                                                                                                                                                                                                                                                                                                                                                                                                                                                                                                                                                                                                                                                                                                                                                                                                                                                                                                                                                                                                                                                                                                                                                                                                                                                                                                                                                                                                                                                                                                                                                                                                                                                                                                                                                                                                                                                                                                                                                                                     |
| Article Type:                 | Original research                                                                                                                                                                                                                                                                                                                                                                                                                                                                                                                                                                                                                                                                                                                                                                                                                                                                                                                                                                                                                                                                                                                                                                                                                                                                                                                                                                                                                                                                                                                                                                                                                                                                                                                                                                                                                                                                                                                                                                                                                                                                                                                                                                                                                                                                                                                                                                                       |
| Date Submitted by the Author: | 18-May-2021                                                                                                                                                                                                                                                                                                                                                                                                                                                                                                                                                                                                                                                                                                                                                                                                                                                                                                                                                                                                                                                                                                                                                                                                                                                                                                                                                                                                                                                                                                                                                                                                                                                                                                                                                                                                                                                                                                                                                                                                                                                                                                                                                                                                                                                                                                                                                                                             |
| Complete List of Authors:     | <p>Gryaznov, Dmitry; University Hospital Basel, Basel Institute for Clinical Epidemiology and Biostatistics ; University of Basel, von Niederhäusern, Belinda ; University Hospital Basel and University of Basel, Department of Clinical Research; Roche Pharma AG</p> <p>Speich, Benjamin; University of Oxford Nuffield Department of Orthopaedics Rheumatology and Musculoskeletal Sciences; University Hospital Basel, Basel Institute for Clinical Epidemiology and Biostatistics</p> <p>Kasenda, Benjamin; University Hospital Basel, Department of Medical Oncology; University Hospital Basel, Basel Institute for Clinical Epidemiology and Biostatistics</p> <p>Ojeda-Ruiz, Elena; University Hospital Basel and University of Basel, Department of Clinical Research, Basel Institute for Clinical Epidemiology and Biostatistics; Osakidetza Basque Health Service, Araba University Hospital, Preventive Medicine Department, Bioaraba Health Research Institute</p> <p>Blümle, Anette ; University of Freiburg, Institute for Evidence in Medicine; Cochrane Germany</p> <p>Schandelmaier, Stefan; University Hospital Basel and University of Basel, Department of Clinical Research, Basel Institute for Clinical Epidemiology and Biostatistics; McMaster University, Department of Health Research Methods, Evidence, and Impact</p> <p>Mertz, Dominik; McMaster University, Department of Health Research Methods, Evidence, and Impact</p> <p>Odutayo, Ayodele; University of Oxford, Nuffield Department of Orthopaedics, Rheumatology and Musculoskeletal Sciences</p> <p>Tomonaga, Yuki; Epidemiology, Biostatistic und Prevention Institute, University of Zurich, Zurich, Switzerland</p> <p>Amstutz, Alain; Schweizerisches Tropen- und Public Health-Institut, Clinical Research Unit; Universitätsspital Basel, Division of Infectious Diseases and Hospital Epidemiology</p> <p>Pauli-Magnus, Christiane ; University Hospital Basel and University of Basel, Department of Clinical Research</p> <p>Gloy, Viktoria; University Hospital Basel, Department of Clinical Research, Basel Institute for Clinical Epidemiology and Biostatistics, University Hospital Basel</p> <p>Lohner, Szimonetta ; Cochrane Hungary, Clinical Centre of the University of Pécs, Medical School, University of Pécs</p> <p>Bischoff, Karin ; University of Freiburg; Cochrane Germany</p> |

|           |                                                                                                                                                                                                                                                                                                                                                                                                                                                                                                                                                                                                                                                                                                                                                                                                                                                                                                                                                                                                                                                                                                                                                                                                                                                                                                                                                                                                                                                                                                                                                                                                                                                                                                                                                                                                                                                                                                                                                                                                                                                                                                                                                                                                                                                                                                                                                                                                                                                                                                                                                                                                                                                                                                                                                                                                                                                                                                                                                                                                                                                      |
|-----------|------------------------------------------------------------------------------------------------------------------------------------------------------------------------------------------------------------------------------------------------------------------------------------------------------------------------------------------------------------------------------------------------------------------------------------------------------------------------------------------------------------------------------------------------------------------------------------------------------------------------------------------------------------------------------------------------------------------------------------------------------------------------------------------------------------------------------------------------------------------------------------------------------------------------------------------------------------------------------------------------------------------------------------------------------------------------------------------------------------------------------------------------------------------------------------------------------------------------------------------------------------------------------------------------------------------------------------------------------------------------------------------------------------------------------------------------------------------------------------------------------------------------------------------------------------------------------------------------------------------------------------------------------------------------------------------------------------------------------------------------------------------------------------------------------------------------------------------------------------------------------------------------------------------------------------------------------------------------------------------------------------------------------------------------------------------------------------------------------------------------------------------------------------------------------------------------------------------------------------------------------------------------------------------------------------------------------------------------------------------------------------------------------------------------------------------------------------------------------------------------------------------------------------------------------------------------------------------------------------------------------------------------------------------------------------------------------------------------------------------------------------------------------------------------------------------------------------------------------------------------------------------------------------------------------------------------------------------------------------------------------------------------------------------------------|
|           | <p>Wollmann, Katharina ; Institute for Evidence in Medicine, Medical Center – University of Freiburg, Faculty of Medicine, University of Freiburg; Cochrane Germany, Cochrane Germany Foundation</p> <p>Rehner, Laura ; University of Freiburg; University Medicine Greifswald, Department of Epidemiology and Community Health, Institute for Community Medicine</p> <p>Meerpohl, Joerg; Medical Center-University of Freiburg, Institute for Evidence in Medicine (for Cochrane Germany Foundation); Cochrane Germany Foundation</p> <p>Nordmann, Alain; University of Basel, Department of Clinical Research, Basel Institute for Clinical Epidemiology and Biostatistics, University Hospital Basel</p> <p>Klatte, Katharina ; Department of Clinical Research, Clinical Trial Unit, University Hospital Basel and University of Basel</p> <p>Ghosh, Nilabh ; University of Basel, Department of Neurosurgery</p> <p>Taji Heravi, Ala ; Department of Clinical Research, Basel Institute for Clinical Epidemiology and Biostatistics, University Hospital Basel and University of Basel</p> <p>Wong, Jaqueline ; Department of Health Research Methods, Evidence, and Impact, McMaster University</p> <p>Chow, Ngai ; McMaster University, Department of Health Research Methods, Evidence, and Impact; Canadian Memorial Chiropractic College, Centre for Disability Prevention and Rehabilitation</p> <p>Hong, Patrick; University of Ottawa Faculty of Medicine</p> <p>McCord, Kimberly; Basel Institute for Clinical Epidemiology and Biostatistics, Department of Clinical Research, University Hospital Basel, University of Basel</p> <p>Sricharoenchai, Sirintip; University Hospital Basel, Department of Clinical Research, Basel Institute for Clinical Epidemiology and Biostatistics, University Hospital Basel</p> <p>Busse, Jason; McMaster University, Anesthesia; McMaster University, Clinical Epidemiology &amp; Biostatistics</p> <p>Agarwal, Arnav; McMaster University, Department of Health Research Methods, Evidence, and Impact</p> <p>Saccilotto, Ramon; Department of Clinical Research, Basel Institute for Clinical Epidemiology and Biostatistics, University Hospital Basel and University of Basel</p> <p>Schwenkglenks, Matthias; University of Basel, Institute of Pharmaceutical Medicine (ECPM); University of Zurich, Epidemiology, Biostatistics and Prevention Institute (EBPI)</p> <p>Moffa, Giusi ; University of Basel, Basel Institute for Clinical Epidemiology and Biostatistics, Department of Clinical Research; University of Basel, Department of Mathematics and Computer Science</p> <p>Hemkens, Lars; University Hospital Basel, Basel Institute for Clinical Epidemiology and Biostatistics</p> <p>Hopewell, Sally; University of Oxford, Nuffield Department of Orthopaedics, Rheumatology and Musculoskeletal Sciences</p> <p>Von Elm , Erik; University of Lausanne,</p> <p>Briel, Matthias; University Hospital Basel, Basel Institute for Clinical Epidemiology and Biostatistics</p> |
| Keywords: | EPIDEMIOLOGY, Clinical trials < THERAPEUTICS, Protocols & guidelines < HEALTH SERVICES ADMINISTRATION & MANAGEMENT                                                                                                                                                                                                                                                                                                                                                                                                                                                                                                                                                                                                                                                                                                                                                                                                                                                                                                                                                                                                                                                                                                                                                                                                                                                                                                                                                                                                                                                                                                                                                                                                                                                                                                                                                                                                                                                                                                                                                                                                                                                                                                                                                                                                                                                                                                                                                                                                                                                                                                                                                                                                                                                                                                                                                                                                                                                                                                                                   |
|           |                                                                                                                                                                                                                                                                                                                                                                                                                                                                                                                                                                                                                                                                                                                                                                                                                                                                                                                                                                                                                                                                                                                                                                                                                                                                                                                                                                                                                                                                                                                                                                                                                                                                                                                                                                                                                                                                                                                                                                                                                                                                                                                                                                                                                                                                                                                                                                                                                                                                                                                                                                                                                                                                                                                                                                                                                                                                                                                                                                                                                                                      |

SCHOLARONE™  
Manuscripts

1  
2  
3  
4  
5  
6  
7  
8  
9  
10  
11  
12  
13  
14  
15  
16  
17  
18  
19  
20  
21  
22  
23  
24  
25  
26  
27  
28  
29  
30  
31  
32  
33  
34  
35  
36  
37  
38  
39  
40  
41  
42  
43  
44  
45  
46  
47  
48  
49  
50  
51  
52  
53  
54  
55  
56  
57  
58  
59  
60

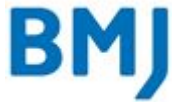

I, the Submitting Author has the right to grant and does grant on behalf of all authors of the Work (as defined in the below author licence), an exclusive licence and/or a non-exclusive licence for contributions from authors who are: i) UK Crown employees; ii) where BMJ has agreed a CC-BY licence shall apply, and/or iii) in accordance with the terms applicable for US Federal Government officers or employees acting as part of their official duties; on a worldwide, perpetual, irrevocable, royalty-free basis to BMJ Publishing Group Ltd ("BMJ") its licensees and where the relevant Journal is co-owned by BMJ to the co-owners of the Journal, to publish the Work in this journal and any other BMJ products and to exploit all rights, as set out in our [licence](#).

The Submitting Author accepts and understands that any supply made under these terms is made by BMJ to the Submitting Author unless you are acting as an employee on behalf of your employer or a postgraduate student of an affiliated institution which is paying any applicable article publishing charge ("APC") for Open Access articles. Where the Submitting Author wishes to make the Work available on an Open Access basis (and intends to pay the relevant APC), the terms of reuse of such Open Access shall be governed by a Creative Commons licence – details of these licences and which [Creative Commons](#) licence will apply to this Work are set out in our licence referred to above.

Other than as permitted in any relevant BMJ Author's Self Archiving Policies, I confirm this Work has not been accepted for publication elsewhere, is not being considered for publication elsewhere and does not duplicate material already published. I confirm all authors consent to publication of this Work and authorise the granting of this licence.

# Reporting quality of clinical trial protocols: a repeated cross sectional study about the Adherence to SPIrit Recommendations in Switzerland, CANada, and GERmany (ASPIRE-SCAGE)

Version 5.3 May 17, 2021

Dmitry Gryaznov<sup>1</sup> MD, MSc; Belinda von Niederhäusern<sup>4,15</sup> PhD; Benjamin Speich<sup>1,3</sup> PhD; Benjamin Kasenda<sup>1,5,6</sup> MD, PhD; Elena Ojeda-Ruiz<sup>1,7</sup> MD; Anette Blümle<sup>8,9</sup> PhD; Stefan Schandelmaier<sup>1,10</sup> MD, PhD; Dominik Mertz<sup>10</sup> MD; Ayodele Odutayo<sup>2,3</sup> MD, PhD; Yuki Tomonaga<sup>11</sup> PhD; Alain Amstutz<sup>1,13,14</sup> MD; Christiane Pauli-Magnus<sup>4</sup> MD, Viktoria Gloy<sup>1</sup> PhD; Szimonetta Lohner<sup>21</sup> MD, PhD; Karin Bischoff<sup>8,9</sup> MSc; Katharina Wollmann<sup>8,9</sup> MSc; Laura Rehner<sup>8,19</sup> MSc; Joerg J Meerpohl<sup>8,9</sup> MD; Alain Nordmann<sup>1</sup> MD, MSc; Katharina Klatte<sup>4</sup> MSc; Nilabh Ghosh<sup>22</sup> MSc; Ala Taji Heravi<sup>1,13</sup> MSc; Jacqueline Wong<sup>10</sup> PhD; Ngai Chow<sup>10</sup> PhD; Patrick Jiho Hong<sup>10,20</sup> PhD; Kimberly McCord<sup>1</sup> PhD; Sirintip Sricharoenchai<sup>1</sup> MD, MSc; Jason W. Busse<sup>10,18</sup> PhD; Arnav Agarwal<sup>10</sup> MD; Ramon Saccilotto<sup>1</sup> MD, MSc; Matthias Schwenkglens<sup>11,12</sup> PhD; Giusi Moffa<sup>1,16</sup> PhD; Lars G. Hemkens<sup>1</sup> MD; Sally Hopewell<sup>3</sup> PhD; Erik von Elm<sup>17</sup> MD, MSc; Matthias Briel<sup>1,10</sup> MD, PhD.

\* Corresponding author

<sup>1</sup> Department of Clinical Research, Basel Institute for Clinical Epidemiology and Biostatistics, University Hospital Basel and University of Basel, Basel, Switzerland

(Emails: DG, [dmitry.gryaznov@usb.ch](mailto:dmitry.gryaznov@usb.ch); BS, [benjamin.speich@ndorms.ox.ac.uk](mailto:benjamin.speich@ndorms.ox.ac.uk); BK, [benjamin.kasenda@usb.ch](mailto:benjamin.kasenda@usb.ch); StS, [stefan.schandelmaier@usb.ch](mailto:stefan.schandelmaier@usb.ch); AA, [alain.amstutz@unibas.ch](mailto:alain.amstutz@unibas.ch); VG, [viktoria.gloy@usb.ch](mailto:viktoria.gloy@usb.ch); AN, [alain.nordmann@usb.ch](mailto:alain.nordmann@usb.ch); NG, [nilabh.ghosh@unibas.ch](mailto:nilabh.ghosh@unibas.ch); ATH, [ala.tajiheravi@usb.ch](mailto:ala.tajiheravi@usb.ch); KMC, [kima.mccord@gmail.com](mailto:kima.mccord@gmail.com); SS, [sirintipsri@gmail.com](mailto:sirintipsri@gmail.com); GM, [giusi.moffa@unibas.ch](mailto:giusi.moffa@unibas.ch); RS, [ramon.saccilotto@usb.ch](mailto:ramon.saccilotto@usb.ch); LGH, [lars.hemkens@usb.ch](mailto:lars.hemkens@usb.ch); MB, [matthias.briel@usb.ch](mailto:matthias.briel@usb.ch))

<sup>2</sup> Applied Health Research Centre, Li Ka Shing Knowledge Institute of St Michael's Hospital, Toronto, Canada (Emails: AO, [ayodele.odutayo@mail.utoronto.ca](mailto:ayodele.odutayo@mail.utoronto.ca))

<sup>3</sup> Oxford Clinical Trials Research Unit and Centre for Statistics in Medicine, Nuffield Department of Orthopaedics, Rheumatology and Musculoskeletal Sciences, University of Oxford, Oxford, United Kingdom (Emails: AO, [ayodele.odutayo@mail.utoronto.ca](mailto:ayodele.odutayo@mail.utoronto.ca); BS, [benjamin.speich@ndorms.ox.ac.uk](mailto:benjamin.speich@ndorms.ox.ac.uk); SH, [sally.hopewell@csm.ox.ac.uk](mailto:sally.hopewell@csm.ox.ac.uk))

<sup>4</sup> Department of Clinical Research, Clinical Trial Unit, University Hospital Basel and University of Basel, Basel, Switzerland (Emails: BvN, [bvniederhaeusern@gmail.com](mailto:bvniederhaeusern@gmail.com); CPM, [christiane.pauli-magnus@usb.ch](mailto:christiane.pauli-magnus@usb.ch); KK, [katharina.klatte@usb.ch](mailto:katharina.klatte@usb.ch))

<sup>5</sup> Department of Medical Oncology, University Hospital Basel, Basel, Switzerland (Email: BK, [Benjamin.kasenda@usb.ch](mailto:Benjamin.kasenda@usb.ch))

<sup>6</sup> iOMEDICO AG, Research & Development, Freiburg, Germany (Email: BK, [Benjamin.kasenda@usb.ch](mailto:Benjamin.kasenda@usb.ch))

<sup>7</sup> Bioaraba Health Research Institute, Health Prevention, Promotion and Care Area; Osakidetza Basque Health Service, Araba University Hospital, Preventive Medicine Department, Vitoria-Gasteiz, Spain (Email: EOR, [e.ojedaerre@gmail.com](mailto:e.ojedaerre@gmail.com))

<sup>8</sup> Institute for Evidence in Medicine, Medical Center – University of Freiburg, Faculty of Medicine, University of Freiburg, Freiburg, Germany (Emails: AM, [bluemle@ifem.uni-freiburg.de](mailto:bluemle@ifem.uni-freiburg.de); KB, [bischoff@ifem.uni-freiburg.de](mailto:bischoff@ifem.uni-freiburg.de); KW, [wollmann@cochrane.de](mailto:wollmann@cochrane.de); LR, [laura.rehner@uni-greifswald.de](mailto:laura.rehner@uni-greifswald.de); JJM, [meerpohl@ifem.uni-freiburg.de](mailto:meerpohl@ifem.uni-freiburg.de))

<sup>9</sup> Cochrane Germany, Cochrane Germany Foundation, Freiburg, Germany (Emails: AM, [blueMLE@ifem.uni-freiburg.de](mailto:blueMLE@ifem.uni-freiburg.de) ; KB, [bischoff@ifem.uni-freiburg.de](mailto:bischoff@ifem.uni-freiburg.de) ; KW [wollmann@cochrane.de](mailto:wollmann@cochrane.de) ; SIL, [lohner.szimonetta@pte.hu](mailto:lohner.szimonetta@pte.hu) ; JJM, [meerpohl@cochrane.de](mailto:meerpohl@cochrane.de))

<sup>10</sup> Department of Health Research Methods, Evidence, and Impact, McMaster University, Hamilton, Canada (Emails: StS, [Stefan.schandelmaier@usb.ch](mailto:Stefan.schandelmaier@usb.ch); DM, [mertzdm@mcmaster.ca](mailto:mertzdm@mcmaster.ca); JW, [wongj37@mcmaster.ca](mailto:wongj37@mcmaster.ca); NC, [nchow@cmcc.ca](mailto:nchow@cmcc.ca); PJHH, [jhong030@uottawa.ca](mailto:jhong030@uottawa.ca); JB, [bussejw@mcmaster.ca](mailto:bussejw@mcmaster.ca); ArA, [arnav.agarwal@mail.utoronto.ca](mailto:arnav.agarwal@mail.utoronto.ca); MB, [Matthias.briel@usb.ch](mailto:Matthias.briel@usb.ch) )

<sup>11</sup> Epidemiology, Biostatistics and Prevention Institute, University of Zurich, Zurich, Switzerland (Emails: YT, [yuki.tomonaga@uzh.ch](mailto:yuki.tomonaga@uzh.ch) ; MS, [matthias.schwenkglens@uzh.ch](mailto:matthias.schwenkglens@uzh.ch))

<sup>12</sup> Institute of Pharmaceutical Medicine (ECPM), University of Basel, Basel, Switzerland (Email: MS, [m.schwenkglens@unibas.ch](mailto:m.schwenkglens@unibas.ch))

<sup>13</sup> Swiss Tropical and Public Health Institute, University of Basel, Basel, Switzerland (Email: AA, [alain.amstutz@unibas.ch](mailto:alain.amstutz@unibas.ch))

<sup>14</sup> Department of Infectious Diseases and Hospital Epidemiology, University Hospital Basel, Basel, Switzerland (Email: AA, [alain.amstutz@unibas.ch](mailto:alain.amstutz@unibas.ch))

<sup>15</sup> Roche Pharma AG, Grenzach-Wyhlen, Germany (Email: BVN, [bvniederhaeusern@gmail.com](mailto:bvniederhaeusern@gmail.com))

<sup>16</sup> Department of Mathematics and Computer Science, University of Basel, Basel, Switzerland (Email: GM, [giusi.moffa@unibas.ch](mailto:giusi.moffa@unibas.ch))

<sup>17</sup> Cochrane Switzerland, Centre for Primary Care and Public Health (Unisanté), University of Lausanne, Lausanne, Switzerland (Email: EvE, [Erik.VonElm@unisante.ch](mailto:Erik.VonElm@unisante.ch))

<sup>18</sup> Department of Anesthesia, McMaster University, Hamilton, Canada (Emails: JWB, [bussejw@mcmaster.ca](mailto:bussejw@mcmaster.ca))

<sup>19</sup> Department of Epidemiology and Community Health, Institute for Community Medicine, University Medicine Greifswald, Greifswald, Germany (Email: LR, [laura.rehner@uni-greifswald.de](mailto:laura.rehner@uni-greifswald.de))

<sup>20</sup> Department of Anesthesiology and Pain Medicine, University of Toronto, Toronto, Canada (Emails: PJHH, [jhong030@uottawa.ca](mailto:jhong030@uottawa.ca))

<sup>21</sup> Cochrane Hungary, Clinical Centre of the University of Pécs, Medical School, University of Pécs, Pécs, Hungary (Emails : SIL, [lohner.szimonetta@pte.hu](mailto:lohner.szimonetta@pte.hu))

<sup>22</sup> Department of Neurosurgery and Department of Biomedicine, University Hospital Basel, University of Basel, Basel, Switzerland (Email: [nilabh.ghosh@unibas.ch](mailto:nilabh.ghosh@unibas.ch))

#### Corresponding author:

Prof. Matthias Briel MD PhD MSc

Department of Clinical Research, Basel Institute for Clinical Epidemiology and Biostatistics,

University Hospital Basel, Spitalstrasse 12, 4031 Basel, Switzerland

Phone: +41-(0)61 328 5092

1  
2  
3 Fax: +41-(0)61 265 3109

4  
5 Email: [matthias.briel@usb.ch](mailto:matthias.briel@usb.ch)  
6  
7  
8  
9

10 Word count abstract: 290

11 Word count main text: 2983

12 Number of tables: 2

13 Number of figures: 2

14 Number of references: 25  
15  
16  
17  
18  
19  
20  
21  
22  
23  
24  
25  
26  
27  
28  
29  
30  
31  
32  
33  
34  
35  
36  
37  
38  
39  
40  
41  
42  
43  
44  
45  
46  
47  
48  
49  
50  
51  
52  
53  
54  
55  
56  
57  
58  
59  
60

For peer review only



## ABSTRACT

### Objectives

Comprehensive protocols are key for the planning and conduct of randomized clinical trials (RCTs). Evidence of low reporting quality of RCT protocols led to the publication of the Standard Protocol Items: Recommendations for Interventional Trials (SPIRIT) checklist in 2013. We aimed to examine the quality of reporting of RCT protocols from three countries before and after the publication of the SPIRIT checklist.

### Design

Repeated cross sectional study.

### Setting

Swiss German and Canadian research ethics committees.

### Participants

RCT protocols approved by research ethics committees in 2012 (n=257) and 2016 (n=292)

### Primary and secondary outcome measures

The primary outcomes were the proportion of reported SPIRIT items per protocol and the proportion of trial protocols reporting individual SPIRIT items. We compared these outcomes in protocols approved in 2012 and 2016, and built regression models to explore factors associated with adherence to SPIRIT. For each protocol, we also extracted information on general trial characteristics and assessed whether individual SPIRIT items were reported

### Results

The median proportion of reported SPIRIT items among RCT protocols showed a non-significant increase from 72% (interquartile range [IQR], 63%-79%) in 2012 to 77% (IQR, 68%-82%) in 2016. However, in a pre-planned subgroup analysis, we detected a significant improvement in investigator-sponsored protocols: the median proportion increased from 64% (IQR, 55%-72%) in 2012 to 76% (IQR, 64%-83%) in 2016, while for industry-sponsored protocols median adherence was 77% (IQR 72%-80%) for both years. The following trial characteristics were independently associated with lower adherence to SPIRIT: single-centre

1  
2  
3 trial, no support from a clinical trials unit or contract research organization, and investigator-  
4  
5 sponsorship.

## 6 7 **Conclusions**

8  
9 In 2012, industry-sponsored RCT protocols were reported more comprehensively than  
10  
11 investigator-sponsored protocols. After publication of the SPIRIT checklist, investigator-  
12  
13 sponsored protocols improved to the level of industry-sponsored protocols, which did not  
14  
15 improve.  
16

## 17 18 **Strengths and limitations of the study:**

- 19  
20  
21
- 22 • We had full access to randomised clinical trials protocols and associated documents  
23 from research ethics committees in three countries approved in 2012 and 2016
  - 24 • All Swiss research ethics committees participated in this study, we used a convenience  
25 sample of the studies approved at the German and Canadian research ethics  
26 committees
  - 27 • We compared the proportion of reported SPIRIT items per protocol and the proportion  
28 of trial protocols reporting individual SPIRIT items between the years 2012 and 2016
  - 29 • We built regression models to explore factors associated with adherence to SPIRIT
- 30  
31  
32  
33  
34  
35  
36  
37  
38  
39

40 **Key words:** Randomised clinical trials, trial protocol, reporting quality, reporting guideline  
41 adherence, meta-research  
42  
43  
44  
45  
46  
47  
48  
49  
50  
51  
52  
53  
54  
55  
56  
57  
58  
59  
60

1  
2  
3  
4  
5  
6  
7  
8  
9  
10  
11  
12  
13  
14  
15  
16  
17  
18  
19  
20  
21  
22  
23  
24  
25  
26  
27  
28  
29  
30  
31  
32  
33  
34  
35  
36  
37  
38  
39  
40  
41  
42  
43  
44  
45  
46  
47  
48  
49  
50  
51  
52  
53  
54  
55  
56  
57  
58  
59  
60

For peer review only

## INTRODUCTION

Randomised clinical trials (RCTs) are directed by their protocol, which documents the rationale, design, and planned reporting of a trial.<sup>1</sup> Funding agencies, research ethics committees (RECs), regulatory agencies, medical journals, systematic reviewers and other groups rely on protocols to appraise the quality of a proposed trial.<sup>2</sup> Incomplete protocols may compromise the safety of study participants, as well as the credibility of trial results. Empirical evidence from meta-research suggested numerous limitations in the reporting of RCT protocols including insufficient descriptions of treatment allocation methods, primary outcomes, sample size calculations, data analysis, and the roles of sponsors in trial design or access to data.<sup>3-9</sup> About half of protocols approved by French RECs, for instance, were estimated to have subsequent amendments to address deficiencies,<sup>10</sup> and a third of amendments submitted to RECs for industry-sponsored trial protocols could have been avoided by preparing more comprehensive protocols.<sup>11 12</sup>

In response, a minimum set of items to be addressed in trial protocols was developed by the Standard Protocol Items: Recommendations for Interventional Trials (SPIRIT) Initiative, and published in January 2013.<sup>13 14</sup> Subsequently, a number of journals publishing trial protocols, funding agencies, and RECs endorsed the use of SPIRIT or related recommendations (e.g., [www.swissethics.ch](http://www.swissethics.ch)).<sup>15</sup> Researchers have applied the SPIRIT checklist to assess the quality of trial protocols with respect to patient reported outcomes,<sup>16</sup> statistical analyses,<sup>17</sup> and cluster-randomised trials with stepped wedge design.<sup>18</sup> However, there is no large-scale empirical study that has longitudinally evaluated the impact of the SPIRIT recommendations on the quality of reporting among RCT protocols.

The Adherence to SPIrit REcommendations (ASPIRE) study group is an international collaboration of researchers with a mandate to (i) evaluate the completeness of RCT protocols before and after publication of the SPIRIT statement, (ii) determine trial characteristics associated with non-adherence to SPIRIT checklist items, and (iii) investigate whether the comprehensiveness of RCT protocols varies across countries.<sup>19</sup> In the present

1  
2  
3 paper we report the results from our investigation of RCT protocols from Switzerland,  
4  
5 Canada, and Germany (ASPIRE-SCAGE).  
6  
7  
8

## 9 **METHODS**

10  
11 The methods used to conduct the present study have previously been published.<sup>19</sup>  
12  
13

### 14 **Identification of included trial protocols**

15  
16 We included trial protocols approved by RECs in 2012 or 2016 that assigned patients or  
17  
18 groups of patients at random to one or more interventions to evaluate their effect on health  
19  
20 outcomes. We excluded RCTs enrolling healthy volunteers, economic evaluations, animal  
21  
22 studies, studies based on tissue samples, observational studies, studies involving only  
23  
24 qualitative methods, and studies with a quasi-random method of allocation. The participating  
25  
26 RECs in Switzerland (Basel, Bern, Geneva, Lausanne, St. Gallen, Thurgau, Ticino, Zurich),  
27  
28 Germany (Freiburg) and Canada (Hamilton) approved this study or explicitly stated that no  
29  
30 ethical approval was required. Details of the identification of included RCT protocols are  
31  
32 presented in **Supplementary Figure 1**.  
33  
34  
35

### 36 **Data extraction**

37  
38 We used a web-based, password protected data extraction tool (<http://squake.ro.ch>) for data  
39  
40 collection and storage.<sup>19 20</sup> Researchers trained in trial methodology completed a calibration  
41  
42 process to improve reliability, and then extracted relevant data from RCT protocols  
43  
44 independently and in duplicate, including whether individual SPIRIT items were reported.<sup>19</sup>  
45  
46 Disagreements were resolved by discussion. Due to limited resources 15% of included  
47  
48 protocols were extracted by a single researcher (having extracted at least 100 RCT protocols  
49  
50 in duplicate). All researchers extracting data from RCT protocols signed confidentiality  
51  
52 agreements and the final database contained only coded data. Our data extraction forms are  
53  
54 provided as **Supplementary Table 1**.  
55  
56  
57

### 58 **Data Analysis**

1  
2  
3 The outcomes of interest were the proportion of SPIRIT checklist items that were reported  
4 among our cohorts of study protocols, and the proportion of RCT protocols addressing each  
5 SPIRIT checklist item. Our primary analysis was based on a rating approach that allowed for  
6 partial credit of individually met sub-items or components of major SPIRIT items, because it  
7 keeps the hierarchical structure of the SPIRIT checklist and it independently considers all  
8 components and sub-items of all individual SPIRIT items.<sup>19</sup> Other rating approaches that  
9 consider major SPIRIT items only or equally consider items and sub-items, were used in  
10 sensitivity analyses.  
11  
12  
13  
14  
15  
16  
17  
18  
19

20 To investigate whether the reporting quality of RCT protocols (as defined by the proportion of  
21 reported SPIRIT checklist items) has increased from 2012 to 2016, we conducted  
22 multivariable beta regression analysis<sup>21</sup> with the proportion of SPIRIT items adhered to per  
23 protocol as dependent variable and the following predefined independent variables: (i)  
24 approval year (2012 *versus* 2016), (ii) investigator sponsorship *versus* industry sponsorship,  
25 (iii) planned sample size (in increments of 1000), (iv) single centre *versus* multicentre RCTs,  
26 and (v) reported methodological support from a CRO or CTU *versus* no reported support. We  
27 included interaction terms in our model to investigate potential interactions of year of  
28 approval (2012 or 2016) with either sponsorship of protocols or reported methodological  
29 support. We performed a likelihood ratio test to check if the interaction terms improved the  
30 goodness of fit of the models. To examine in a sensitivity analysis whether the  
31 comprehensiveness of RCT protocols varied across countries we stratified the median  
32 proportion of addressed SPIRIT items per protocol by country (Switzerland, Canada,  
33 Germany), by year of approval (2012 *versus* 2016), and by sponsorship (investigator *versus*  
34 industry), and added a country variable to the regression model. In further sensitivity  
35 analyses, we used hierarchical logistic regression (response is a binary variable indicating  
36 adherence to each SPIRIT item with clustering by protocol; i.e. independent variables were  
37 included in the model as fixed effects and the protocol as a random effect) instead of beta  
38 regression.<sup>19</sup>  
39  
40  
41  
42  
43  
44  
45  
46  
47  
48  
49  
50  
51  
52  
53  
54  
55  
56  
57  
58  
59  
60

1  
2  
3 For all types of regression analyses we reported coefficients or odds ratios (ORs)  
4 accompanied by 95% confidence intervals (CIs). We provided descriptive statistics as  
5 frequencies and proportions for binary data and median (interquartile range, IQR) for  
6 continuous data. We used the statistical software R version 3.6.1 for all data analysis. All  
7 statistical tests were performed using a significance level of  $p=0.05$ .  
8  
9  
10  
11  
12

### 13 14 **Patient and public Involvement**

15  
16 No patients were involved in the study.  
17  
18

## 19 **RESULTS**

### 20 21 **Characteristics of included trial protocols**

22 We included 549 RCT protocols in our study; 257 from 2012 and 292 from 2016 (**Table 1**).  
23 The majority of which were individually randomised, multicentre, parallel-group, superiority  
24 trials in oncology or cardiovascular medicine, and approved by a Swiss REC. About half of  
25 the protocols were investigator-sponsored and half were industry-sponsored. In 2016 there  
26 were more investigator-sponsored protocols (162/292, 55.5%) included than in 2012  
27 (119/257, 46.3%). In 2016 the median planned sample size was lower (199; IQR, 100-490)  
28 than in 2012 (300; IQR, 100-720). Otherwise, trial characteristics were similar between  
29 cohorts. Protocols of industry-sponsored RCTs had, on average, a larger sample size, were  
30 predominantly multinational, and more frequently placebo-controlled than those of  
31 investigator-sponsored RCTs (**Table 1**).  
32  
33  
34  
35  
36  
37  
38  
39  
40  
41  
42  
43  
44  
45  
46  
47  
48  
49  
50  
51  
52  
53  
54  
55  
56  
57  
58  
59  
60

**Table 1:** Characteristics of included randomised trial protocols

| Characteristics                                 | 2012             |                      |                | 2016             |                      |                | Overall        |
|-------------------------------------------------|------------------|----------------------|----------------|------------------|----------------------|----------------|----------------|
|                                                 | Sponsorship      |                      | Total (n=257)  | Sponsorship      |                      | Total (N=292)  | Total (N=549)  |
|                                                 | Industry (N=138) | Investigator (N=119) |                | Industry (N=130) | Investigator (N=162) |                |                |
| <b>Planned target sample size, median (IQR)</b> | 450 (184.5, 800) | 150 (63, 516)        | 300 (100, 720) | 306.5 (150,621)  | 141 (70, 300)        | 199 (100, 490) | 220 (100, 597) |
| <b>Planned centres</b>                          |                  |                      |                |                  |                      |                |                |
| Single centre, No. (%)                          | 2 (1.4%)         | 45 (37.8%)           | 47 (18.3%)     | 4 (3.1%)         | 73 (45.1%)           | 77 (26.4%)     | 124 (22.6%)    |
| Multicentre, national, No. (%)                  | 10 (7.2%)        | 30 (25.2%)           | 40 (15.6%)     | 6 (4.6%)         | 41 (25.3%)           | 47 (16.1%)     | 87 (15.8%)     |
| Multicentre, multinational, No. (%)             | 126 (91.3%)      | 44 (37.0%)           | 170 (66.1%)    | 120 (92.3%)      | 48 (29.6%)           | 168 (57.5%)    | 338 (61.6%)    |
| <b>Unit of randomisation</b>                    |                  |                      |                |                  |                      |                |                |
| Individuals                                     | 137 (99.3%)      | 113 (95.0%)          | 250 (97.3%)    | 127 (97.7%)      | 158 (97.5%)          | 285 (97.6%)    | 535 (97.4%)    |
| Clusters                                        | 0 (0.0%)         | 4 (3.4%)             | 4 (1.6%)       | 1 (0.8%)         | 3 (1.9%)             | 4 (1.4%)       | 8 (1.5%)       |
| Body parts                                      | 1 (0.7%)         | 2 (1.7%)             | 3 (1.2%)       | 2 (1.5%)         | 1 (0.6%)             | 3 (1.0%)       | 6 (1.1%)       |
| <b>Study design</b>                             |                  |                      |                |                  |                      |                |                |
| Parallel                                        | 135 (97.8%)      | 104 (87.4%)          | 239 (93.0%)    | 127 (97.7%)      | 147 (90.7%)          | 274 (93.8%)    | 513 (93.4%)    |
| Crossover                                       | 2 (1.4%)         | 9 (7.6%)             | 11 (4.3%)      | 2 (1.5%)         | 10 (6.2%)            | 12 (4.1%)      | 23 (4.2%)      |
| Factorial                                       | 1 (0.7%)         | 6 (5.0%)             | 7 (2.7%)       | 1 (0.8%)         | 5 (3.1%)             | 6 (2.1%)       | 13 (2.4%)      |
| <b>Study purpose</b>                            |                  |                      |                |                  |                      |                |                |
| Superiority                                     | 110 (79.7%)      | 93 (78.2%)           | 203 (79.0%)    | 107 (82.3%)      | 132 (81.5%)          | 239 (81.8%)    | 442 (80.5%)    |
| Non-inferiority                                 | 23 (16.7%)       | 19 (16.0%)           | 42 (16.3%)     | 20 (15.4%)       | 24 (14.8%)           | 44 (15.1%)     | 86 (15.7%)     |
| Unclear                                         | 5 (3.6%)         | 7 (5.9%)             | 12 (4.7%)      | 3 (2.3%)         | 6 (3.7%)             | 9 (3.1%)       | 21 (3.8%)      |
| <b>Placebo used</b>                             | 77 (55.8%)       | 30 (25.2%)           | 107 (41.6%)    | 78 (60.0%)       | 41 (25.3%)           | 119 (40.8%)    | 226 (41.2%)    |
| <b>CTU or CRO support</b>                       | 93 (67.4%)       | 56 (47.1%)           | 149 (58.0%)    | 79 (60.8%)       | 83 (51.2%)           | 162 (55.5%)    | 311 (56.6%)    |
| <b>Country</b>                                  |                  |                      |                |                  |                      |                |                |
| Switzerland                                     | 91 (66.0%)       | 89 (74.8%)           | 180 (70.0%)    | 86 (66.2%)       | 131 (80.9%)          | 217 (74.3%)    | 397 (72.3%)    |
| Canada                                          | 21 (15.2%)       | 19 (16.0%)           | 40 (15.6%)     | 17 (13.1%)       | 20 (12.3%)           | 37 (12.7%)     | 77 (14.0%)     |



|         |            |           |            |            |           |            |            |
|---------|------------|-----------|------------|------------|-----------|------------|------------|
| Germany | 26 (18.8%) | 11 (9.2%) | 37 (14.4%) | 27 (20.8%) | 11 (6.8%) | 38 (13.0%) | 75 (13.7%) |
|---------|------------|-----------|------------|------------|-----------|------------|------------|

Abbreviations: CRO, contract research organization; CTU, clinical trials unit; IQR, interquartile range.

For peer review only

### Adherence to SPIRIT in protocols from 2012 and 2016

Overall, the median proportion of reported SPIRIT items increased from 72% (IQR, 63%-79%) in 2012 to 77% (IQR, 68%-82%) in 2016 (**Table 2, Figure 1**).

**Table 2:** Adherence to SPIRIT items in RCT protocols

| Characteristic                                                    | 2012             |                      |                       | 2016              |                      |                       |
|-------------------------------------------------------------------|------------------|----------------------|-----------------------|-------------------|----------------------|-----------------------|
|                                                                   | Sponsorship      |                      | Total 2012<br>(n=257) | Sponsorship       |                      | Total 2016<br>(n=292) |
|                                                                   | Industry (n=138) | Investigator (n=119) |                       | Industry (n=130)  | Investigator (n=162) |                       |
|                                                                   | median (IQR)     | median (IQR)         | median (IQR)          | median (IQR)      | median (IQR)         | median (IQR)          |
| Absolute number of SPIRIT items reported per protocol (out of 33) | 25.5 (23.6-26.5) | 21.3 (18.3, 23.7)    | 23.7 (20.7, 26.2)     | 25.3 (23.7%-26.9) | 25.0 (21.3-27.3)     | 25.3 (22.5-27.1)      |
| <b>Proportion of SPIRIT items reported per protocol</b>           | 77% (72%-80%)    | 64% (55%-72%)        | 72% (63%-79%)         | 77% (72%-82%)     | 76% (64%-83%)        | 77% (68%-82%)         |

Abbreviations: IQR, interquartile range

1  
2  
3 Stratifying by sponsorship, we found that the comprehensiveness increased only in  
4 investigator-sponsored RCT protocols (adherence stratified by other study characteristics  
5 can be found in **Supplementary Table 2**). The median proportion of reported SPIRIT items  
6 in investigator-sponsored protocols increased from 64% (IQR, 55%-72%) in 2012 to 76%  
7 (IQR, 64%-83%) in 2016, while it remained unchanged at 77% for both years among  
8 industry-sponsored protocols (77%, IQR 72%-80% in 2012, and 77%, IQR 72%-82% in  
9 2016). This pattern was consistent across countries (**Supplementary Table 3**). Sensitivity  
10 analyses using different approaches to calculate the proportion of reported SPIRIT items  
11 provided similar results (**Supplementary Table 4**).

12  
13 Regarding individual SPIRIT items, we found that the improvement in investigator-sponsored  
14 RCT protocols was due to an improvement in a broad range of SPIRIT items  
15 (**Supplementary Table 5**); for 25 individual items the proportion of adherent protocols  
16 improved in investigator-sponsored RCTs by 10% or more (**Supplementary Table 6**). These  
17 25 items included descriptive (e.g. information on study registration, protocol version & date,  
18 name & contact details of sponsor) as well as methodological aspects (e.g. comparator  
19 choice explained, or allocation concealment mechanism). The largest improvements  
20 occurred with “trial registration” (SPIRIT item 2, +41.1%), “plans to disseminate trial results to  
21 key stakeholders/publication provided” (SPIRIT item 31a, +36.7%), “description of process  
22 for making amendments” (SPIRIT item 25, +34.4%), and “declaration of interests” (SPIRIT  
23 item 28, +31.6%). In industry-sponsored protocols, adherence to individual SPIRIT items  
24 remained practically stable from 2012 to 2016, i.e. items with low adherence in 2012  
25 remained low in 2016. SPIRIT items with particularly low adherence (< 30%) in both industry-  
26 and investigator-sponsored protocols were “names of protocol contributors/authors” (SPIRIT  
27 item 5a), “research question described and justified” (SPIRIT item 6a), “eligibility criteria for  
28 study centres” (SPIRIT item 10) in applicable RCTs, “location of participant recruitment” and  
29 “estimated recruitment rate” (SPIRIT item 15), “information about who will have access to the  
30 full dataset” (SPIRIT item 29), and “description of plans for granting access to full trial  
31 protocol” (SPIRIT item 31c), (**Supplementary Table 5**).

## Multivariable regression analysis

Using multivariable beta or logistic regression, we found that four characteristics were independently associated with greater reporting of SPIRIT items: multicentre RCTs, RCTs with reported methodological support from CTUs or CROs, industry-sponsored RCTs, and RCTs approved in 2016 (**Supplementary Table 7, Figure 2**).

Adding the interaction term of year of approval and sponsorship to the model, improved the model fit (likelihood ratio test,  $\text{Chisq} = 30.01$ ,  $p < 0.01$ ) and provided evidence for a differential improvement in the adherence to SPIRIT over time (2012 vs 2016) for industry-sponsored and investigator-sponsored protocols suggesting that there was an improvement in investigator-sponsored protocols but not in industry-sponsored protocols. We did not find evidence for an interaction between year of approval and CTU/CRO support, i.e. protocols with or without reported support from CTUs or CROs improved to a similar extent from 2012 to 2016. Limiting our multivariable regression to investigator-sponsored protocols in an exploratory analysis, we found a notable interaction suggesting a more pronounced improvement in Swiss protocols compared with protocols from Canada or Germany (**Supplementary Table 8**).

## DISCUSSION

### Main findings and interpretation

This study of 549 RCT protocols approved by RECs in Switzerland, Canada, and Germany before (2012) and after (2016) the publication of the SPIRIT recommendations suggested a small overall improvement in reporting comprehensiveness. This change was driven by an increase in the median proportion of reported SPIRIT items in investigator-sponsored RCTs from 64% in 2012 to 76% in 2016. Protocols of industry-sponsored RCTs remained, on average, unchanged (median of 77% SPIRIT items reported in both years). The reporting of investigator-sponsored protocols improved for the majority of individual SPIRIT items, and was independent of the planned sample size, reported support from a CTU or CRO, and

1  
2  
3 centre status (single- vs multicentre) of RCTs. Single centre status, no reported support from  
4 a CTU or CRO, investigator sponsorship, and approval in 2012 were independently  
5 associated with lower adherence to the SPIRIT checklist. These results were similar across  
6 countries, but the improvement in investigator-sponsored RCT protocols appeared more  
7 pronounced among Swiss protocols compared with protocols approved in Canada or  
8 Germany. SPIRIT items with particularly low adherence in investigator- and industry  
9 sponsored protocols concerned the names of protocol contributors/authors, the justification  
10 of the research question, details about the planned participant recruitment, information about  
11 who will have access to the full dataset, and plans for granting access to the full trial protocol.  
12  
13 Our findings suggest an international improvement in the comprehensiveness of investigator-  
14 sponsored RCT protocols probably due to a combination of reasons including the publication  
15 of the SPIRIT checklist and its implementation by research institutions, funding agencies,  
16 and medical journals; the ongoing discussion about the importance of protocol publication,  
17 thoughtful planning of RCTs, and minimising reporting biases in the scientific community; and  
18 efforts to teach RCT methodology to clinician scientists in under- and postgraduate courses.  
19  
20 The more pronounced improvement of Swiss investigator-sponsored protocols could be  
21 related to a SPIRIT-based protocol template and guidance provided by swissethics that were  
22 particularly welcomed by academic researchers or other changes in the context of the new  
23 Swiss legislation on human research from 2014.

### 24 **Strengths and limitations**

25 Strengths of our study include full access to RCT protocols and associated documents from  
26 RECs in three countries. We used standardized methods and procedures for data extraction  
27 and protocol assessment at all RECs and involved only trained methodologists in this  
28 process. This included use of piloted extraction forms with detailed written instructions as  
29 well as calibration exercises with all data extractors. More than 95% of included protocols  
30 approved in 2012 and over 80% of protocols approved in 2016 were extracted independently  
31 and in duplicate. To minimise chance associations, we considered only a limited number of  
32  
33  
34  
35  
36  
37  
38  
39  
40  
41  
42  
43  
44  
45  
46  
47  
48  
49  
50  
51  
52  
53  
54  
55  
56  
57  
58  
59  
60

1  
2  
3 variables in our statistical models.<sup>22</sup> Our results proved robust in sensitivity analyses applying  
4 alternative assumptions and statistical approaches. The fact that practically all Swiss RECs  
5 participated in this study strengthens the representativeness of our data for Switzerland and  
6 the additional inclusion of a German and a Canadian REC allowed for international  
7 generalizability.  
8  
9

10  
11  
12  
13  
14 Our study has several limitations. First, we used a convenience sample of two RECs outside  
15 of Switzerland (Freiburg in Germany, Hamilton in Canada) but we cannot be certain if they  
16 are representative of other RECs in these or other countries. Second, we used RCT  
17 protocols that had already been approved by RECs, therefore SPIRIT items such as  
18 “research ethics approval” and “consent forms provided” were always fulfilled and could not  
19 discriminate more comprehensive from less comprehensive protocols. Third, although we  
20 had adequate statistical power to detect even interactions within the subgroup of  
21 investigator-sponsored protocols, the number of included protocols approved outside of  
22 Switzerland was relatively small (28%; 152/549), limiting the precision of estimates for  
23 German and Canadian protocols. Finally, our findings are not proof of causality, however, it  
24 is plausible that the publication of the SPIRIT statement at least contributed to an increase in  
25 the comprehensiveness of investigator-sponsored protocols. Investigations of a potential  
26 time trend with gradually increasing comprehensiveness of investigator-sponsored protocols  
27 by year tertiles did not suggest a continuous development, but rather a one-step-effect  
28  
29  
30  
31  
32  
33  
34  
35  
36  
37  
38  
39  
40  
41  
42  
43  
44  
45  
46  
47  
48  
49  
50  
51  
52  
53  
54  
55  
56  
57  
58  
59  
60  
**(Supplementary Figure 2).**

### **Comparison with other studies**

Few studies in the literature have used<sup>16</sup> or planned to use<sup>17 18 23</sup> the SPIRIT checklist as a  
tool to assess the comprehensiveness of trial protocols. One study investigated 75 RCT  
protocols from the UK National Institute for Health Research (NIHR) Health Technology  
Assessment (HTA) programme on the reporting of patient-reported outcomes and the  
association with general protocol completeness according to SPIRIT.<sup>16</sup> They found that these  
investigator-sponsored UK RCT protocols from 2012 and 2013 reported, on average, 63% of

1  
2  
3 SPIRIT checklist items, which is very similar to our findings for investigator-sponsored RCT  
4 protocols from 2012. Apart from the ongoing study using protocols from UK RECs (ASPIRE-  
5 UK<sup>19</sup>), we are not aware of any other study evaluating the comprehensiveness of RCT  
6  
7  
8  
9 protocols before and after the publication of the SPIRIT statement in industry- and  
10  
11 investigator-sponsored protocols.  
12

13  
14 There are studies assessing the quality of RCT protocols using measures other than the  
15 SPIRIT checklist. An analysis of drug trial protocols submitted to three Dutch RECs in  
16 2010/11 focused on critical comments by RECs.<sup>24</sup> They found that applicants of investigator-  
17  
18  
19 sponsored trials received more critical comments on participant selection, methodology, and  
20  
21  
22 statistical analysis than applicants of industry-sponsored trials, resonating with our findings of  
23  
24  
25 less comprehensive investigator-sponsored protocols compared with industry protocols in  
26  
27 2012. Similarly, studies by Getz et al. used the proportion of protocols with substantial  
28  
29  
30 amendments as a measure of RCT protocol quality in the industry setting showing that more  
31  
32  
33 comprehensive protocols could have prevented amendments.<sup>11 12</sup> Finally, a study of 596  
34  
35  
36 published RCT protocols from 2001 to 2011 assessed protocol quality (high versus low)  
37  
38  
39 based on reporting of the allocation method, allocation concealment, and intention-to-treat  
40  
41  
42 analysis.<sup>25</sup> This study found a substantial improvement in some methodological aspects of  
43  
44  
45 protocols (e.g. allocation concealment), but acknowledged the overall low proportion of high  
46  
47  
48 quality protocols with 24% in 2001-2004, 31% in 2005-2008, and 37% in 2008-2011.  
49

## 50 51 52 53 54 55 56 57 58 59 60

### Implications

Incomplete protocols may jeopardize the clinical research process at all stages with  
potentially harmful consequences for patients, decision-makers in health care, the scientific  
community, and society as a whole. Whether there is indeed an association between better  
reported or more comprehensive RCT protocols and better methodology, successful trial  
conduct, and/or publication of RCTs remains to be established. Based on the RCT sample of  
this study, we will examine the relationship between completeness of RCT protocols and

1  
2  
3 risks for premature discontinuation or non-publication of RCTs in a subsequent investigation  
4

5 19.

6  
7 Our results show improvement in the reporting quality of investigator-sponsored trial  
8  
9 protocols such that they became consistent with industry protocols. About why industry  
10  
11 protocols have not improved according to SPIRIT between 2012 and 2016, we can only  
12  
13 speculate. It might be that routines and processes for writing trial protocols have been well  
14  
15 established at companies earlier explaining our finding of consistently low adherence to  
16  
17 specific SPIRIT items in 2012 and 2016 in industry-sponsored protocols. So, as long as  
18  
19 regulators do not make specific protocol templates mandatory for all applicants, industry may  
20  
21 not adapt routines and templates according to SPIRIT.  
22  
23

24 Our finding of insufficient reporting of names of protocol contributors/authors, the justification  
25  
26 of the research question, details about the planned participant recruitment, information about  
27  
28 who will have access to the full dataset, and plans for granting access to the full trial protocol  
29  
30 guides involved stakeholders with respect to further needs for protocol improvement. The  
31  
32 identified items constitute important pieces of information to enable a valid assessment of the  
33  
34 relevance, feasibility, and transparency of planned clinical trials.  
35  
36  
37  
38  
39

## 40 **Conclusions**

41 This before-and-after study suggests that the comprehensiveness of investigator-sponsored  
42  
43 RCT protocols from Switzerland, Canada, and Germany improved after publication of the  
44  
45 SPIRIT checklist, achieving a similar reporting quality as industry-sponsored protocols.  
46  
47 Single centre status, no reported support from a CTU or CRO, investigator sponsorship, and  
48  
49 approval in 2012 were independently associated with lower adherence to SPIRIT. Further  
50  
51 means are needed to improve the reporting of RCT protocols particularly with respect to  
52  
53 protocol authorship, justification of the research question, participant recruitment, access to  
54  
55 the full dataset, and plans for granting access to the full trial protocol. Future research should  
56  
57 clarify the relationship between protocol quality and success of subsequent trial conduct and  
58  
59 publication.  
60



## DECLARATIONS

**Ethics approval and consent to participate:** All participating ethics committees are project partners.

**Consent for publication:** Not applicable.

**Availability of data and material:** Data underlying this article will be shared on reasonable request to the corresponding author

**Data access, responsibility, and analysis:** DG had full access to all the data in the study and takes responsibility for the integrity of the data and the accuracy of the data analysis.

**Competing interests:** BvN is currently employed by Roche Pharma AG, Grenzach-Wyhlen, Germany. BK is currently employed by iOMEDICO AG, Freiburg, Germany. All other authors declare no financial relationships with any organization that might have an interest in the submitted work and no other relationships or activities that could appear to have influenced the submitted work.

**Funding:** This work was supported by the Swiss Federal Office of Public Health. The funder has no role in the study design, data collection and analysis, decision to publish, or preparation of this manuscript. BS is supported by an Advanced Postdoc.Mobility grant from the Swiss National Science Foundation (P300PB\_177933). SIL participates in this project during her research stay at the Institute for Evidence in Medicine, University of Freiburg, supported by the Alexander von Humboldt Foundation, Germany.

**Authors' contributions:** AO, SH, EvE, BK, and MB conceived of the study. EvE and MB acquired funding. RS developed the web-tool for data extractions. DG, BvN, BS, and MB coordinated data extraction from protocols. MB and DG wrote the first draft of the manuscript. DG, BvN, BS, BK, EOR, AB, StS, DM, YT, AA, CPM, VG, KB, KKu, LR, SIL, JM, AN, KKI, NG, ATH, JW, NC, PJHH, KMC, SiS, JWB, ArA, MS, LH, SH, EvE and MB were involved in data collection and critically revised the manuscript. All authors approved the final version before submission.

1  
2  
3 **Acknowledgments:** We are grateful to Prof. Doug Altman (University of Oxford) who was  
4 instrumental in developing the initial concept of the Adherence to SPIrit REcommendations  
5 (ASPIRE) study and who sadly died before it came to fruition. We thank all participating  
6  
7 Research Ethics Committees from Germany (Freiburg), Switzerland (Basel, Ticino, Bern,  
8  
9 Geneva, Lausanne, St. Gallen, Thurgau, Zurich), Canada (Hamilton), and the UK (National  
10  
11 Health Service Health Research Authority) for their support and cooperation.  
12  
13  
14

15 **Authors' information (optional):** Not applicable  
16  
17  
18  
19  
20  
21  
22  
23  
24  
25  
26  
27  
28  
29  
30  
31  
32  
33  
34  
35  
36  
37  
38  
39  
40  
41  
42  
43  
44  
45  
46  
47  
48  
49  
50  
51  
52  
53  
54  
55  
56  
57  
58  
59  
60

For peer review only

## References

1. World Medical Association. WMA Declaration of Helsinki - ethical principles for medical research involving human subjects 2013 [Available from: <https://www.wma.net/policies-post/wma-declaration-of-helsinki-ethical-principles-for-medical-research-involving-human-subjects/2020>].
2. Dwan K, Altman DG, Cresswell L, et al. Comparison of protocols and registry entries to published reports for randomised controlled trials. *Cochrane Database Syst Rev* 2011(1):MR000031. doi: 10.1002/14651858.MR000031.pub2
3. Tetzlaff JM, Chan AW, Kitchen J, et al. Guidelines for randomized clinical trial protocol content: a systematic review. *Syst Rev* 2012;1:43. doi: 10.1186/2046-4053-1-43
4. Scharf O, Colevas AD. Adverse event reporting in publications compared with sponsor database for cancer clinical trials. *J Clin Oncol* 2006;24(24):3933-8. doi: 10.1200/JCO.2005.05.3959
5. Pildal J, Chan AW, Hrobjartsson A, et al. Comparison of descriptions of allocation concealment in trial protocols and the published reports: cohort study. *BMJ* 2005;330(7499):1049. doi: 10.1136/bmj.38414.422650.8F
6. Hrobjartsson A, Pildal J, Chan AW, et al. Reporting on blinding in trial protocols and corresponding publications was often inadequate but rarely contradictory. *J Clin Epidemiol* 2009;62(9):967-73. doi: 10.1016/j.jclinepi.2009.04.003
7. Chan A, Hróbjartsson A, Haahr MT, et al. Empirical evidence for selective reporting of outcomes in randomized trials: Comparison of protocols to published articles. *JAMA* 2004;291(20):2457-65. doi: 10.1001/jama.291.20.2457
8. Al-Marzouki S, Roberts I, Evans S, et al. Selective reporting in clinical trials: analysis of trial protocols accepted by The Lancet. *The Lancet* 2008;372(9634):201. doi: [https://doi.org/10.1016/S0140-6736\(08\)61060-0](https://doi.org/10.1016/S0140-6736(08)61060-0)
9. Smyth RM, Kirkham JJ, Jacoby A, et al. Frequency and reasons for outcome reporting bias in clinical trials: interviews with trialists. *BMJ* 2011;342:c7153. doi: 10.1136/bmj.c7153
10. Decullier E, Lhéritier V, Chapuis F. Fate of biomedical research protocols and publication bias in France: retrospective cohort study. *BMJ* 2005;331(7507):19. doi: 10.1136/bmj.38488.385995.8F
11. Getz KA, Zuckerman R, Cropp AB, et al. Measuring the Incidence, Causes, and Repercussions of Protocol Amendments. *Drug Information Journal* 2011;45(3):265-75. doi: 10.1177/009286151104500307
12. Getz KA, Stergiopoulos S, Short M, et al. The Impact of Protocol Amendments on Clinical Trial Performance and Cost. *Therapeutic Innovation & Regulatory Science* 2016;50(4):436-41. doi: 10.1177/2168479016632271
13. Chan AW, Tetzlaff JM, Altman DG, et al. SPIRIT 2013 statement: defining standard protocol items for clinical trials. *Ann Intern Med* 2013;158(3):200-7. doi: 10.7326/0003-4819-158-3-201302050-00583
14. Chan A-W, Tetzlaff JM, Gøtzsche PC, et al. SPIRIT 2013 explanation and elaboration: guidance for protocols of clinical trials. *BMJ* 2013;346 doi: 10.1136/bmj.e7586
15. The SPIRIT Group. SPIRIT Endorsement [Available from: <https://www.spirit-statement.org/about-spirit/spirit-endorsement/> accessed 15 August 2020.
16. Kyte D, Duffy H, Fletcher B, et al. Systematic Evaluation of the Patient-Reported Outcome (PRO) Content of Clinical Trial Protocols. *PLoS ONE* 2014;9(10):e110229. doi: 10.1371/journal.pone.0110229
17. Madden K, Arseneau E, Evaniew N, et al. Reporting of planned statistical methods in published surgical randomised trial protocols: a protocol for a methodological systematic review. *BMJ Open* 2016;6(6):e011188. doi: 10.1136/bmjopen-2016-011188
18. Thabane A, Dennis BB, Gajic-Veljanoski O, et al. Reporting quality of stepped wedge design randomized trials: a systematic review protocol. *Clin Epidemiol* 2016;8:261-6. doi: 10.2147/CLEP.S103098
19. Gryaznov D, Odutayo A, von Niederhäusern B, et al. Rationale and design of repeated cross-sectional studies to evaluate the reporting quality of trial protocols: the Adherence to SPIrit REcommendations (ASPIRE) study and associated projects. *Trials* 2020;21(1):896. doi: 10.1186/s13063-020-04808-y

- 1  
2  
3 20. Kasenda B, von Elm E, You J, et al. Prevalence, characteristics, and publication of discontinued  
4 randomized trials. *JAMA* 2014;311(10):1045-52. doi: 10.1001/jama.2014.1361  
5  
6 21. Ferrari S, Cribari-Neto F. Beta Regression for Modelling Rates and Proportions. *Journal of Applied*  
7 *Statistics* 2004;31(7):799-815. doi: 10.1080/0266476042000214501  
8  
9 22. Babyak MA. What You See May Not Be What You Get: A Brief, Nontechnical Introduction to Overfitting in  
10 Regression-Type Models. *Psychosomatic Medicine* 2004;66(3):411-21.  
11  
12 23. Ahmed K, Kyte D, Keeley T, et al. Systematic evaluation of patient-reported outcome (PRO) protocol  
13 content and reporting in UK cancer clinical trials: the EPiC study protocol. *BMJ Open*  
14 2016;6(9):e012863. doi: 10.1136/bmjopen-2016-012863  
15  
16 24. van Lent M, Rongen GA, Out HJ. Shortcomings of protocols of drug trials in relation to sponsorship as  
17 identified by Research Ethics Committees: analysis of comments raised during ethical review. *BMC*  
18 *Medical Ethics* 2014;15(1):83. doi: 10.1186/1472-6939-15-83  
19  
20 25. van Rosmalen BV, Alldinger I, Cieslak KP, et al. Worldwide trends in volume and quality of published  
21 protocols of randomized controlled trials. *PloS one* 2017;12(3):e0173042-e42. doi:  
22 10.1371/journal.pone.0173042  
23  
24  
25  
26  
27  
28  
29  
30  
31  
32  
33  
34  
35  
36  
37  
38  
39  
40  
41  
42  
43  
44  
45  
46  
47  
48  
49  
50  
51  
52  
53  
54  
55  
56  
57  
58  
59  
60

## Figure Legends

**Figure 1:** Proportion of reported SPIRIT items by year and study sponsorship

**Figure 2:** Results from a Beta regression major item approach, allowing for partial credit

Abbreviations: CTU, Clinical Trials Unit; CRO, Contract Research Organization; CI, confidence interval. \*In 1000 increments. Results from two models with interaction terms are reported separately.

For peer review only

1  
2  
3  
4  
5  
6  
7  
8  
9  
10  
11  
12  
13  
14  
15  
16  
17  
18  
19  
20  
21  
22  
23  
24  
25  
26  
27  
28  
29  
30  
31  
32  
33  
34  
35  
36  
37  
38  
39  
40  
41  
42  
43  
44  
45  
46  
47  
48  
49  
50  
51  
52  
53  
54  
55  
56  
57  
58  
59  
60

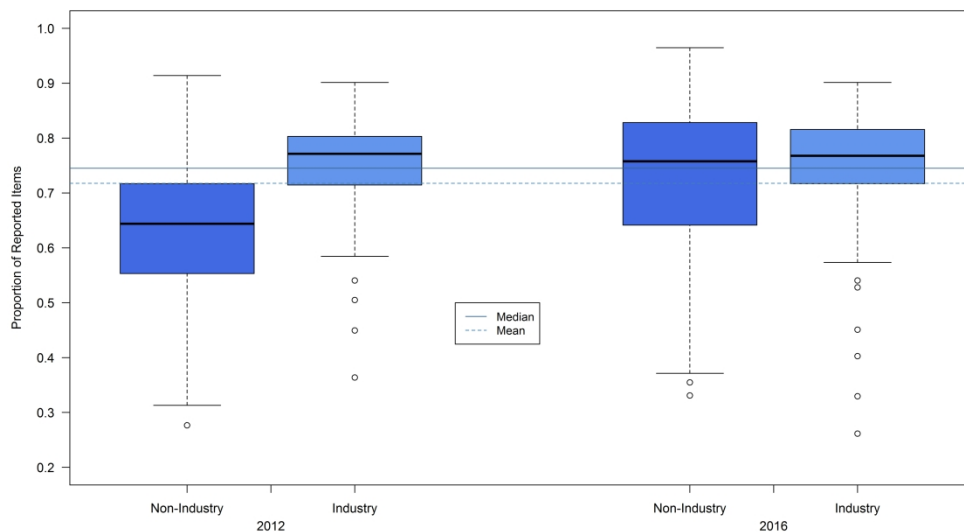

Figure 1: Proportion of reported SPIRIT items by year and study sponsorship

330x203mm (300 x 300 DPI)

1  
2  
3  
4  
5  
6  
7  
8  
9  
10  
11  
12  
13  
14  
15  
16  
17  
18  
19  
20  
21  
22  
23  
24  
25  
26  
27  
28  
29  
30  
31  
32  
33  
34  
35  
36  
37  
38  
39  
40  
41  
42  
43  
44  
45  
46  
47  
48  
49  
50  
51  
52  
53  
54  
55  
56  
57  
58  
59  
60

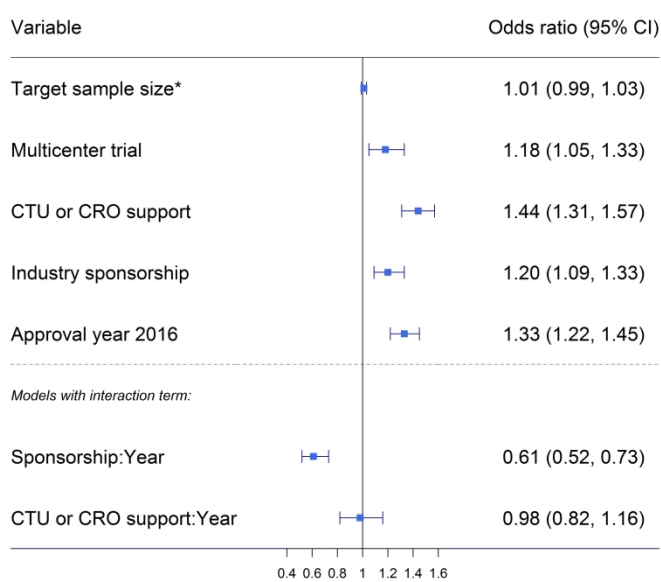

Figure 2: Results from a Beta regression major item approach, allowing for partial credit  
330x203mm (300 x 300 DPI)

# Reporting quality of clinical trial protocols: a repeated cross sectional study about the Adherence to SPIrit Recommendations in Switzerland, CANada, and GERmany (ASPIRE-SCAGE)

## Supplementary material

1. **Supplementary Figure 1:** “Flow diagram for included randomised clinical trial protocols in ASPIRE with ethics approval in 2012 and 2016 from Switzerland, Germany, and Canada”
2. **Supplementary Figure 2:** Box-plots of proportions of reported SPIRIT items by year and tertile in investigator-sponsored protocols
3. **Supplementary Table 1:** Data Extraction Form
4. **Supplementary Table 2:** Adherence to SPIRIT items in RCT protocols by approval year and median target sample size, multicentre vs single centre trials, and with vs without CTU or CRO support
5. **Supplementary Table 3:** Adherence to SPIRIT items in RCT protocols by country and sponsorship
6. **Supplementary Table 4:** Sensitivity analyses of calculating the adherence to SPIRIT items for RCT protocols by sponsorship
7. **Supplementary Table 5:** Adherence to individual SPIRIT items by year and sponsorship
8. **Supplementary Table 6:** Adherence to SPIRIT items in Investigator-sponsored protocols that improved by 10% or more
9. **Supplementary Table 7:** Results from multivariable Beta and Logistic regressions for all approaches
10. **Supplementary Table 8:** Results from multivariable Beta regression, subset of Investigator-sponsored protocols



## Supplementary Figure 1

**Figure 1A:** Flow diagram for included randomized clinical trial protocols in ASPIRE with ethics approval in 2012

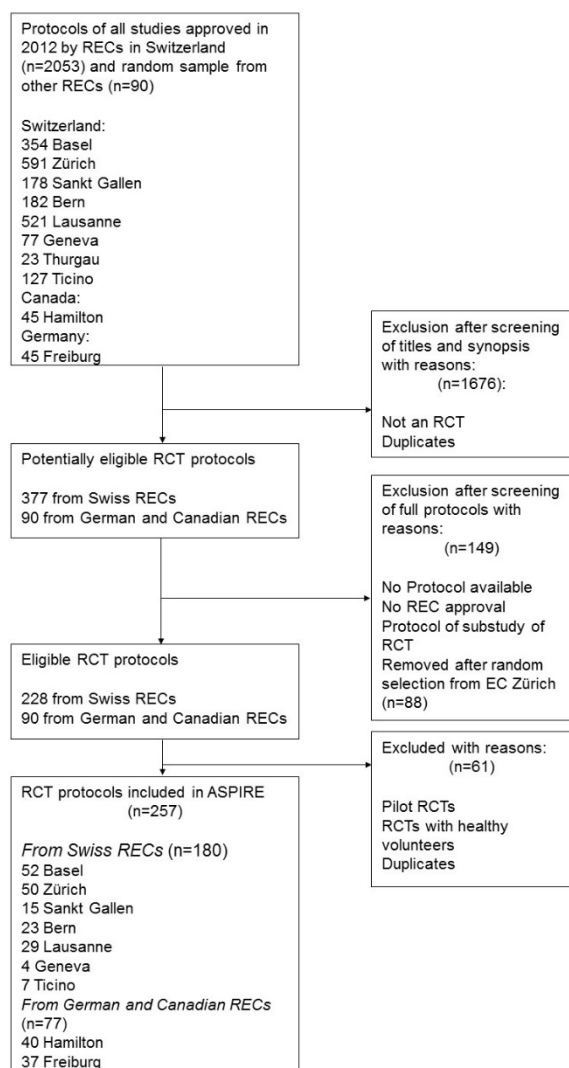

**Figure 1B:** Flow diagram for included randomized clinical trial protocols in ASPIRE with ethics approval in 2016

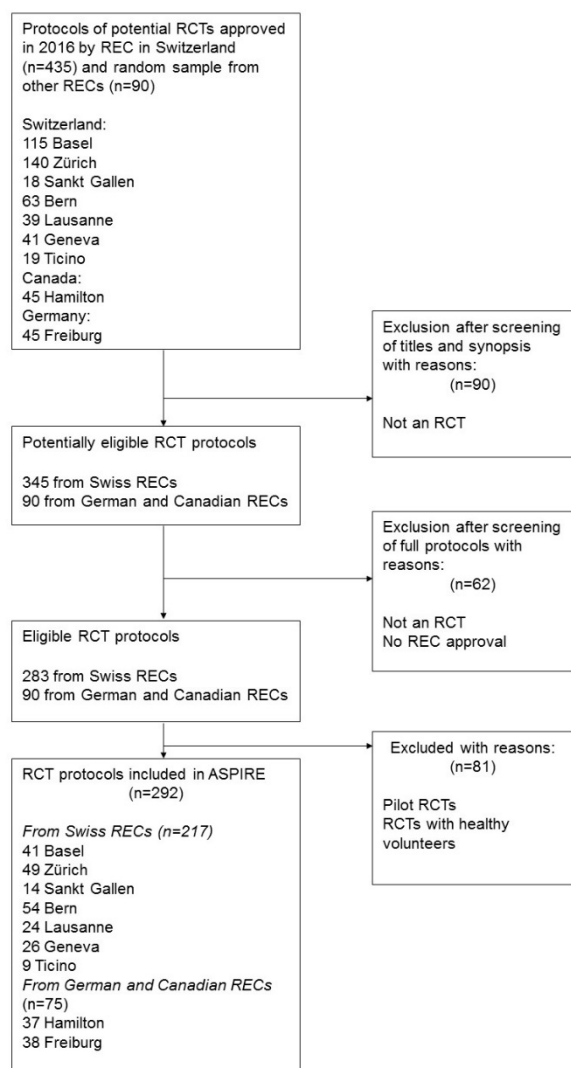

Abbreviations: REC: Research Ethic Committee; RCT: Randomised clinical trial

**Legend Supplementary eFigure 1:** Flow diagram for included randomised clinical trial protocols in ASPIRE with ethics approval in 2012 and 2016 from Switzerland, Germany, and Canada

Supplementary Figure 2

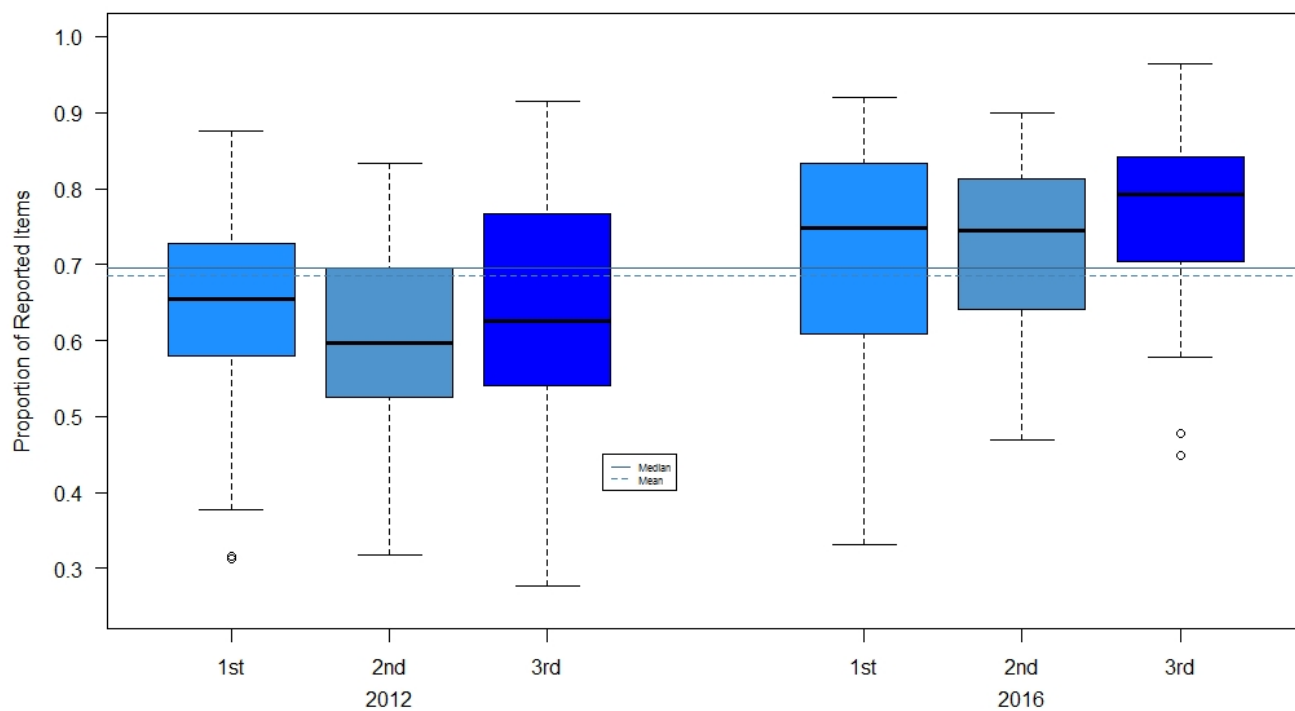

Legend Supplementary eFigure 2: Box-plots of proportions of reported SPIRIT items by year and tertile in investigator-sponsored protocols

## Supplementary Table 1

### Data Extraction Form

| Label                                                                                          | Options                                                  |
|------------------------------------------------------------------------------------------------|----------------------------------------------------------|
| 1. Country of Ethics Committee                                                                 |                                                          |
| 2. Name of Ethics Centre                                                                       |                                                          |
| 3. Local Ethics Identification Number                                                          |                                                          |
| 4. Sponsor name (title, first name, surname, company if applicable)                            |                                                          |
| 5. Sponsor email address                                                                       |                                                          |
| 6. Site/Location of overall study initiation (PI affiliation)                                  | Switzerland                                              |
|                                                                                                | Other                                                    |
|                                                                                                | Not reported                                             |
| If site initiation in Switzerland, please provide name and location of institution:            |                                                          |
| 7. Study Acronym                                                                               |                                                          |
| 8. Study Title (Exact Quote)                                                                   |                                                          |
| 9. Date of Ethics Application                                                                  |                                                          |
| 9a. Date of first RESPONSE by Ethics Committee (does not need to be the same as approval date) |                                                          |
| 9b. Response category (Switzerland specific, others select "not applicable")                   | A positiv                                                |
|                                                                                                | B positiv mit Bemerkung                                  |
|                                                                                                | C mit Auflage,<br>Nachbegutachtung<br>notwendig          |
|                                                                                                | C mit Auflage, schriftliche<br>Mitteilung ausreichend    |
|                                                                                                | D negativ                                                |
|                                                                                                | E Nicht-Eintreten                                        |
|                                                                                                | Not applicable as Ethics<br>Committee not in Switzerland |
| 10. Date of first APPROVAL by Ethics Committee                                                 |                                                          |
| 11. Clinical Area                                                                              | Medical                                                  |
|                                                                                                | Surgical                                                 |
|                                                                                                | Paediatrics                                              |
|                                                                                                | Other                                                    |
| If medical area, choose from list                                                              | Neurology                                                |
|                                                                                                | Cardiovascular                                           |
|                                                                                                | Respiratory                                              |
|                                                                                                | Gastro/intestinal                                        |
|                                                                                                | Nephrology                                               |
|                                                                                                | Rheumatology                                             |
|                                                                                                | Infectious Disease                                       |
|                                                                                                | Oncology                                                 |
|                                                                                                | Intensive Care                                           |
| Hematology                                                                                     |                                                          |

1  
2  
3  
4  
5  
6  
7  
8  
9  
10  
11  
12  
13  
14  
15  
16  
17  
18  
19  
20  
21  
22  
23  
24  
25  
26  
27  
28  
29  
30  
31  
32  
33  
34  
35  
36  
37  
38  
39  
40  
41  
42  
43  
44  
45  
46  
47  
48  
49  
50  
51  
52  
53  
54  
55  
56  
57  
58  
59  
60

|                                            |                        |
|--------------------------------------------|------------------------|
|                                            | Endocrinology          |
|                                            | Dermatology            |
|                                            | Anaesthetics           |
|                                            | Psychiatry             |
|                                            | Other                  |
| If surgical area, choose from list         | General Surgery        |
|                                            | Obstetrics/Gynecology  |
|                                            | Neurosurgery           |
|                                            | Ophthalmology          |
|                                            | Ear-nose-throat (ENT)  |
|                                            | Cardiothoracic         |
|                                            | Urology                |
|                                            | Orthopedics            |
|                                            | Plastic Surgery        |
|                                            | Other                  |
| If pediatrics area, choose from list       | Neurology              |
|                                            | Cardiovascular         |
|                                            | Respiratory            |
|                                            | Gastro/intestinal      |
|                                            | Nephrology             |
|                                            | Rheumatology           |
|                                            | Infectious diseases    |
|                                            | Oncology               |
|                                            | Intensive care         |
|                                            | Hematology             |
|                                            | Endocrinology          |
|                                            | Dermatology            |
|                                            | Anaesthetics           |
|                                            | General surgery        |
|                                            | Neurosurgery           |
|                                            | Ophthalmology          |
|                                            | Ear-nose-throat (ENT)  |
|                                            | Cardiothoracic         |
|                                            | Urology                |
|                                            | Orthopedics            |
|                                            | Plastic Surgery        |
|                                            | Other                  |
| 12. Trial Registration Number              |                        |
| 13. Trial Registry Name                    | Clinicaltrials.gov     |
|                                            | ISRCTN                 |
|                                            | EudraCT                |
|                                            | ANZCTR                 |
|                                            | Not reported           |
|                                            | Other (please specify) |
| 14. Swiss Human Research Act Risk Category | A                      |

|                                                                                                                                                |                                                                                                               |
|------------------------------------------------------------------------------------------------------------------------------------------------|---------------------------------------------------------------------------------------------------------------|
|                                                                                                                                                | B                                                                                                             |
|                                                                                                                                                | C                                                                                                             |
|                                                                                                                                                | Not applicable                                                                                                |
|                                                                                                                                                | Not reported                                                                                                  |
| 15. Is trial labelled as pilot or feasibility trial?                                                                                           | Yes                                                                                                           |
|                                                                                                                                                | No                                                                                                            |
| 16. Is it a dose finding trial?                                                                                                                | Yes                                                                                                           |
|                                                                                                                                                | No                                                                                                            |
| 17. Hypothesis (check all that apply)                                                                                                          | Superiority                                                                                                   |
|                                                                                                                                                | Non-inferiority / Equivalence                                                                                 |
|                                                                                                                                                | Not labelled in this regard / unclear                                                                         |
| 18. Please copy the primary outcome(s) from the protocol                                                                                       |                                                                                                               |
| 19. Are any outcomes specifically labelled as "adverse events", "adverse effects", "side effects", or "tolerability"?                          | Yes                                                                                                           |
|                                                                                                                                                | No                                                                                                            |
| If yes, adverse events (or synonyms thereof) are...                                                                                            | not further specified (e.g. the term adverse events is just mentioned under outcome section)                  |
|                                                                                                                                                | specifically defined (e.g. specific types of adverse events such as rash, itching, nausea etc. are mentioned) |
| 20. Is a patient-reported outcome specified (an outcome that comprises information reported by a patient or a caregiver (parent or guardian))? | Yes                                                                                                           |
|                                                                                                                                                | No                                                                                                            |
| If yes: the specified patient-reported outcome captures the following information (check all that apply):                                      | Symptoms (pain, headaches, sleeplessness, etc.)                                                               |
|                                                                                                                                                | Physical functioning                                                                                          |
|                                                                                                                                                | Mental/emotional functioning                                                                                  |
|                                                                                                                                                | Social functioning                                                                                            |
|                                                                                                                                                | Disease-specific outcome measure (eg. Asthma QoL questionnaire, Beck Depression Inventory)                    |
|                                                                                                                                                | Multidimensional health-related quality of life (HRQL; eg. SF-36)                                             |
|                                                                                                                                                | Overall sense of well-being in one question (holistic HRQL; eg. captured with a VAS)                          |
|                                                                                                                                                | Satisfaction with treatment                                                                                   |

|                                                                                         |                                                                                 |
|-----------------------------------------------------------------------------------------|---------------------------------------------------------------------------------|
|                                                                                         | Utility (an individual's preferences/values for certain health states/outcomes) |
|                                                                                         | Other (please specify)                                                          |
| If yes: patient-reported outcome + measurement instrument                               |                                                                                 |
| If yes, patient-reported outcome used for sample size calculation?                      | Yes                                                                             |
|                                                                                         | No                                                                              |
| If yes, minimal important difference (MID) mentioned?                                   | Yes                                                                             |
|                                                                                         | No                                                                              |
| If yes, reference for MID? (please enter full citation or if not reported, enter "NR")  |                                                                                 |
| 20a. Is routinely collected data used in the study?                                     | Yes                                                                             |
|                                                                                         | No                                                                              |
| 20b. If yes, routinely collected data is used:                                          | For patient identification and/or recruitment?                                  |
|                                                                                         | As part of the randomized intervention?                                         |
|                                                                                         | For any of the planned outcomes?                                                |
|                                                                                         | Other                                                                           |
| 21. Any planned collection of costs or cost-effectiveness analysis mentioned?           | Yes                                                                             |
|                                                                                         | No                                                                              |
| 22. The setting for the majority of recruited patients is (check all that apply)        | Community                                                                       |
|                                                                                         | Outpatient clinic                                                               |
|                                                                                         | Emergency department                                                            |
|                                                                                         | In-patients hospital care                                                       |
|                                                                                         | Intensive care unit                                                             |
|                                                                                         | Unclear                                                                         |
| 23. The age-group of patient population is (check all that apply)                       | Adults (>=16 years)                                                             |
|                                                                                         | Only elderly (>=60)                                                             |
|                                                                                         | Pediatric (<18)                                                                 |
| 24. Please specify the study population                                                 |                                                                                 |
| 25. Estimated sample size/number of participants                                        |                                                                                 |
| 26. Number of overall study centres                                                     |                                                                                 |
| 27. If multicentre, national or multinational                                           | National                                                                        |
|                                                                                         | International                                                                   |
|                                                                                         | Not applicable                                                                  |
| 28. Number of study centres recruiting in Switzerland (or Canada/Germany if applicable) |                                                                                 |
| 29. Trial Design (check all that apply)                                                 | Parallel                                                                        |
|                                                                                         | Crossover                                                                       |
|                                                                                         | Cluster                                                                         |
|                                                                                         | Factorial                                                                       |
|                                                                                         | Split Body                                                                      |
|                                                                                         | Other                                                                           |

|                                                                                                                                        |                                                    |
|----------------------------------------------------------------------------------------------------------------------------------------|----------------------------------------------------|
|                                                                                                                                        | Not applicable                                     |
| 30. Number of trial arms                                                                                                               |                                                    |
| 31. Presence of logistic/ methodological support/experience? (check all that apply)                                                    | Clinical trial unit (CTU)                          |
|                                                                                                                                        | Contract Research Organization (CRO)               |
|                                                                                                                                        | Evidence for ample expertise of the PI/Institution |
|                                                                                                                                        | Not reported                                       |
|                                                                                                                                        | Other                                              |
| 32. Please specify the intervention(s)                                                                                                 |                                                    |
| 33. Intervention category/ies                                                                                                          | Drug                                               |
|                                                                                                                                        | Surgery / Invasive Procedure                       |
|                                                                                                                                        | Device                                             |
|                                                                                                                                        | Vaccine                                            |
|                                                                                                                                        | Radiation                                          |
|                                                                                                                                        | Rehabilitation                                     |
|                                                                                                                                        | Behavioural / Lifestyle / Education / Counselling  |
|                                                                                                                                        | Dietary Supplement                                 |
|                                                                                                                                        | Other                                              |
| 34. Please specify the control(s)                                                                                                      |                                                    |
| 35. Type of control(s)                                                                                                                 | No treatment / Standard care                       |
|                                                                                                                                        | Active (drug/other treatment)                      |
|                                                                                                                                        | Placebo / Sham                                     |
| 36. Name of funder(s)                                                                                                                  |                                                    |
| 37. Initiation/Sponsorship                                                                                                             | Definitely industry initiated                      |
|                                                                                                                                        | Probably industry initiated                        |
|                                                                                                                                        | Probably investigator initiated                    |
|                                                                                                                                        | Definitely investigator initiated                  |
| 38. Title: Basic study design, patient population, and intervention provided in study title (if applicable trial acronym)? (reporting) | Yes                                                |
|                                                                                                                                        | No                                                 |
| 39. Trial Registration: Registry name and trial identifier provided? (reporting)                                                       | Yes                                                |
|                                                                                                                                        | No                                                 |
| 40. Protocol: Version Number and date provided? (reporting)                                                                            | Yes                                                |
|                                                                                                                                        | No                                                 |
| 41. Funding: Sources of financial and non-financial support declared? (reporting)                                                      | Yes                                                |
|                                                                                                                                        | No                                                 |
| 42. Roles and Responsibilities: Names of protocol contributors/ authors provided? (reporting)                                          | Yes                                                |
|                                                                                                                                        | No                                                 |
|                                                                                                                                        | Yes                                                |

|                                                                                                                                                                                                                          |                |
|--------------------------------------------------------------------------------------------------------------------------------------------------------------------------------------------------------------------------|----------------|
| 43. Roles and Responsibilities: Name and contact details of sponsor provided? (reporting)                                                                                                                                | No             |
| 44. Roles and Responsibilities: Role of sponsor and funder in trial described? (reporting)                                                                                                                               | Yes            |
|                                                                                                                                                                                                                          | No             |
| 45. Roles and Responsibilities: Steering Committee General Membership and Role described? (reporting)                                                                                                                    | Yes            |
|                                                                                                                                                                                                                          | No             |
|                                                                                                                                                                                                                          | Not applicable |
| 46. Background and rationale: Is research question described and justified? (as a minimum, we expect a systematic search, see info) (reporting)                                                                          | Yes            |
|                                                                                                                                                                                                                          | No             |
| 46a. Systematic review on PICO explicitly mentioned in background/introduction?                                                                                                                                          | Yes            |
|                                                                                                                                                                                                                          | No             |
| 47. Background and rationale: Comparator choice explained? (reporting)                                                                                                                                                   | Yes            |
|                                                                                                                                                                                                                          | No             |
| 48. Objectives: Specific objectives described for each comparison (if multiple)? (reporting)                                                                                                                             | Yes            |
|                                                                                                                                                                                                                          | No             |
| 49. Trial design: Trial design described? (trial type (eg, parallel group, crossover, factorial, single group), allocation ratio, and framework (eg, superiority, equivalence, noninferiority, exploratory)) (reporting) | Yes            |
|                                                                                                                                                                                                                          | No             |
| 50. Study Setting: Are countries where data will be collected listed? (reporting)                                                                                                                                        | Yes            |
|                                                                                                                                                                                                                          | No             |
| 51. Eligibility criteria: Inclusion and exclusion criteria for trial participants described? (reporting)                                                                                                                 | Yes            |
|                                                                                                                                                                                                                          | No             |
| 52. Eligibility criteria: Inclusion and exclusion criteria for study centres and individuals who will perform the intervention described? (reporting)                                                                    | Yes            |
|                                                                                                                                                                                                                          | No             |
|                                                                                                                                                                                                                          | Not applicable |
| 53. Intervention(drug): Generic Name, Dose and Schedule of intervention described? (reporting)                                                                                                                           | Yes            |
|                                                                                                                                                                                                                          | No             |
|                                                                                                                                                                                                                          | Not applicable |
| 54. Intervention(non-drug): Setting of intervention administration described? (reporting)                                                                                                                                | Yes            |
|                                                                                                                                                                                                                          | No             |
|                                                                                                                                                                                                                          | Not applicable |
| 55. Intervention(non-drug): Individuals administering interventions (e.g. expertise) mentioned? (reporting)                                                                                                              | Yes            |
|                                                                                                                                                                                                                          | No             |
|                                                                                                                                                                                                                          | Not applicable |
| 56. Interventions - Modifications: Standard criteria for modifications of interventions described? (reporting)                                                                                                           | Yes            |
|                                                                                                                                                                                                                          | No             |
|                                                                                                                                                                                                                          | Not applicable |
| 57. Interventions - Adherence: Are strategies to improve adherence or any procedures for monitoring adherence described? (reporting)                                                                                     | Yes            |
|                                                                                                                                                                                                                          | No             |
|                                                                                                                                                                                                                          | Not applicable |
| 58. Interventions - Concomitant care: Permitted care and interventions during trial described? (reporting)                                                                                                               | Yes            |
|                                                                                                                                                                                                                          | No             |
| 59. Primary Outcome: Specific measurement variable described? (reporting)                                                                                                                                                | Yes            |
|                                                                                                                                                                                                                          | No             |
|                                                                                                                                                                                                                          | Not applicable |
|                                                                                                                                                                                                                          | Yes            |



|    |                                                                                                            |                |
|----|------------------------------------------------------------------------------------------------------------|----------------|
| 1  |                                                                                                            |                |
| 2  |                                                                                                            |                |
| 3  |                                                                                                            |                |
| 4  | 60. Primary Outcome: Analysis metric (e.g. change from baseline) described? (reporting)                    | No             |
| 5  |                                                                                                            | Not applicable |
| 6  | 61. Primary Outcomes: Is time point of measurement mentioned? (reporting)                                  | Yes            |
| 7  |                                                                                                            | No             |
| 8  |                                                                                                            | Not applicable |
| 9  |                                                                                                            |                |
| 10 | 62. Participant timeline: Timing of visit for participants described (e.g. schematic diagram)? (reporting) | Yes            |
| 11 |                                                                                                            | No             |
| 12 | 63. Sample size: Estimated number total or per group mentioned? (reporting)                                | Yes            |
| 13 |                                                                                                            | No             |
| 14 |                                                                                                            |                |
| 15 | 64. Sample size: Outcome used for samples size calculation described? (reporting)                          | Yes            |
| 16 |                                                                                                            | No             |
| 17 |                                                                                                            | Not applicable |
| 18 |                                                                                                            |                |
| 19 | 65. Sample size: Assumed values for outcome in each study group provided? (reporting)                      | Yes            |
| 20 |                                                                                                            | No             |
| 21 |                                                                                                            | Not applicable |
| 22 |                                                                                                            |                |
| 23 | 66. Sample size: Rationale or reference for assumed outcome values provided? (reporting)                   | Yes            |
| 24 |                                                                                                            | No             |
| 25 |                                                                                                            | Not applicable |
| 26 |                                                                                                            |                |
| 27 | 67. Sample size: Type of statistical test provided? (reporting)                                            | Yes            |
| 28 |                                                                                                            | No             |
| 29 |                                                                                                            | Not applicable |
| 30 |                                                                                                            |                |
| 31 | 68. Sample size: Alpha value provided? (reporting)                                                         | Yes            |
| 32 |                                                                                                            | No             |
| 33 |                                                                                                            | Not applicable |
| 34 |                                                                                                            |                |
| 35 | 69. Sample size: Statistical Power provided? (reporting)                                                   | Yes            |
| 36 |                                                                                                            | No             |
| 37 |                                                                                                            | Not applicable |
| 38 |                                                                                                            |                |
| 39 | 70. Sample size: Adjustment for missing data, if relevant, described? (reporting)                          | Yes            |
| 40 |                                                                                                            | No             |
| 41 |                                                                                                            | Not applicable |
| 42 |                                                                                                            |                |
| 43 | 71. Sample size: Rationale for intended sample size if not derived statistically provided? (reporting)     | Yes            |
| 44 |                                                                                                            | No             |
| 45 |                                                                                                            | Not applicable |
| 46 |                                                                                                            |                |
| 47 | 72. Recruitment: Location of participant recruitment described? (reporting)                                | Yes            |
| 48 |                                                                                                            | No             |
| 49 | 73. Recruitment: Person(s) who will recruit participants described? (reporting)                            | Yes            |
| 50 |                                                                                                            | No             |
| 51 | 74. Recruitment: Expected recruitment rate provided? (reporting)                                           | Yes            |
| 52 |                                                                                                            | No             |
| 53 | 75. Recruitment: Estimated number or rate of eligible patients                                             |                |
| 54 | 76. Recruitment: Estimated duration of the patient recruitment                                             |                |
| 55 |                                                                                                            |                |
| 56 | 77. Recruitment: Monitoring of recruitment during trial mentioned? (reporting)                             | Yes            |
| 57 |                                                                                                            | No             |
| 58 |                                                                                                            |                |
| 59 | 78. Recruitment: Financial and non-financial incentives for participants described? (reporting)            | Yes            |
| 60 |                                                                                                            | No             |

|                                                                                                                                          |                |
|------------------------------------------------------------------------------------------------------------------------------------------|----------------|
|                                                                                                                                          | Not applicable |
| 79. Recruitment: Financial and non-financial incentives for investigators described? (reporting)                                         | Yes            |
|                                                                                                                                          | No             |
| 80. Allocation: Method for generation of random sequence described? ( e.g. computer-generated random numbers) (reporting)                | Yes            |
|                                                                                                                                          | No             |
|                                                                                                                                          | Not applicable |
| 81. Allocation: Ratio provided? (e.g. 1:1, 2:1) (reporting)                                                                              | Yes            |
|                                                                                                                                          | No             |
|                                                                                                                                          | Not applicable |
| 82. Allocation: Type of randomization described? (e.g. "simple", block, matched pair, etc.) (reporting)                                  | Yes            |
|                                                                                                                                          | No             |
|                                                                                                                                          | Not applicable |
| 83. Allocation: Non-random allocation-method described? (reporting)                                                                      | Yes            |
|                                                                                                                                          | No             |
|                                                                                                                                          | Not applicable |
| 84. Allocation: Rationale for non-random allocation provided? (reporting)                                                                | Yes            |
|                                                                                                                                          | No             |
|                                                                                                                                          | Not applicable |
| 85. Allocation: Allocation concealment mechanism described? (reporting)                                                                  | Yes            |
|                                                                                                                                          | No             |
|                                                                                                                                          | Not applicable |
| 86. Allocation: Person who will enroll/assign participants described? (reporting)                                                        | Yes            |
|                                                                                                                                          | No             |
|                                                                                                                                          | Not applicable |
| 87. Blinding: Status of participants described? (reporting)                                                                              | Yes            |
|                                                                                                                                          | No             |
| 88. Blinding: Status of care providers described? (reporting)                                                                            | Yes            |
|                                                                                                                                          | No             |
| 89. Blinding: Status of outcome assessors described? (reporting)                                                                         | Yes            |
|                                                                                                                                          | No             |
| 90. Blinding: Conditions when unblinding is permissible mentioned? (reporting)                                                           | Yes            |
|                                                                                                                                          | No             |
|                                                                                                                                          | Not applicable |
| 91. Data Collection: Personnel who will collect data specified? (reporting)                                                              | Yes            |
|                                                                                                                                          | No             |
| 92. Data collection: Strategies to promote participant retention and complete follow-up described? (reporting)                           | Yes            |
|                                                                                                                                          | No             |
| 93. Data Management: Data entry and coding processes described? (reporting)                                                              | Yes            |
|                                                                                                                                          | No             |
| 94. Statistical Methods: Main analysis for primary outcome including analysis methods for statistical comparisons described? (reporting) | Yes            |
|                                                                                                                                          | No             |
| 95. Statistical Methods: Handling of missing data defined? (reporting)                                                                   | Yes            |
|                                                                                                                                          | No             |
|                                                                                                                                          | Not applicable |
|                                                                                                                                          | Yes            |

|    |                                                                                                                                                                          |                           |
|----|--------------------------------------------------------------------------------------------------------------------------------------------------------------------------|---------------------------|
| 1  |                                                                                                                                                                          |                           |
| 2  |                                                                                                                                                                          |                           |
| 3  | 96. Statistical Methods: Effect measure for primary analysis clearly specified? (e.g. risk ratio, odds ratio etc.) (reporting)                                           | No                        |
| 4  |                                                                                                                                                                          |                           |
| 5  | 97. Statistical Methods: Significance level specified? (e.g. alpha of 5% or p<0.05) (reporting)                                                                          | Yes                       |
| 6  |                                                                                                                                                                          | No                        |
| 7  |                                                                                                                                                                          |                           |
| 8  | 98. Statistical Methods: Use of confidence intervals mentioned? (e.g. "results will be accompanied by a confidence interval") (reporting)                                | Yes                       |
| 9  |                                                                                                                                                                          | No                        |
| 10 | 99. Statistical Methods: Definition of subgroup categories provided? (reporting)                                                                                         | Yes                       |
| 11 |                                                                                                                                                                          | No                        |
| 12 |                                                                                                                                                                          | Not applicable            |
| 13 |                                                                                                                                                                          |                           |
| 14 | 100. Any subgroup analysis mentioned (this question triggers a set of questions for a subproject independent of SPIRIT)?                                                 | Yes                       |
| 15 |                                                                                                                                                                          | No                        |
| 16 | If yes, is it explicitly mentioned that subgroup analyses are exploratory?                                                                                               | Yes                       |
| 17 |                                                                                                                                                                          | No                        |
| 18 |                                                                                                                                                                          |                           |
| 19 | If yes, is a clear hypothesis for a subgroup effect pre-specified?                                                                                                       | Yes                       |
| 20 |                                                                                                                                                                          | No                        |
| 21 |                                                                                                                                                                          |                           |
| 22 | If yes, is a clear hypothesis with a direction of subgroup effect pre-specified?                                                                                         | Yes                       |
| 23 |                                                                                                                                                                          | No                        |
| 24 |                                                                                                                                                                          |                           |
| 25 | If yes, use of interaction test for subgroup analysis mentioned?                                                                                                         | Yes                       |
| 26 |                                                                                                                                                                          | No                        |
| 27 | If yes, please list planned subgroup variables                                                                                                                           |                           |
| 28 | If yes, please list planned outcomes for subgroup analyses                                                                                                               |                           |
| 29 |                                                                                                                                                                          |                           |
| 30 | If yes, please specify number of subgroup analyses planned (=SG variables x outcomes)                                                                                    |                           |
| 31 |                                                                                                                                                                          |                           |
| 32 | If yes, subgroup analysis considered in sample size calculation?                                                                                                         | Yes                       |
| 33 |                                                                                                                                                                          | No                        |
| 34 |                                                                                                                                                                          |                           |
| 35 | 101. Statistical Methods: Does the protocol define which participants will be included in the main analysis in terms of protocol adherence and missing data? (reporting) | Yes                       |
| 36 |                                                                                                                                                                          | No                        |
| 37 |                                                                                                                                                                          |                           |
| 38 | 102. Data Monitoring Committee: Is a data monitoring committee planned for this study?                                                                                   | Yes                       |
| 39 |                                                                                                                                                                          | No                        |
| 40 |                                                                                                                                                                          |                           |
| 41 | 103. Data Monitoring Committee: Is it explicitly reported whether a DMC is planned or why it is not planned? (reporting)                                                 | Yes                       |
| 42 |                                                                                                                                                                          | No                        |
| 43 |                                                                                                                                                                          |                           |
| 44 | 104. Data Monitoring: Planned number of interim analyses                                                                                                                 |                           |
| 45 | 105. Data Monitoring: Purpose of interim analyses (check all that apply)                                                                                                 | Benefit                   |
| 46 |                                                                                                                                                                          | Harm                      |
| 47 |                                                                                                                                                                          | Futility                  |
| 48 |                                                                                                                                                                          | Sample size recalculation |
| 49 |                                                                                                                                                                          | No reason provided        |
| 50 |                                                                                                                                                                          | Not applicable            |
| 51 |                                                                                                                                                                          | Other                     |
| 52 |                                                                                                                                                                          |                           |
| 53 | 106. Data Monitoring: Reported who has ultimate authority to stop the trial? (reporting)                                                                                 | Yes                       |
| 54 |                                                                                                                                                                          | No                        |
| 55 |                                                                                                                                                                          |                           |
| 56 | 107. Data Monitoring: Does the sponsor retain the right to stop the trial?                                                                                               | Yes                       |
| 57 |                                                                                                                                                                          | No                        |
| 58 |                                                                                                                                                                          | Not reported              |
| 59 |                                                                                                                                                                          |                           |
| 60 | If yes, explicitly at any time for any reason?                                                                                                                           | Yes                       |
|    |                                                                                                                                                                          | No                        |

|                                                                                                                                                                                                  |                                                                                                                                                                                                                                                                                                                                                                                                               |
|--------------------------------------------------------------------------------------------------------------------------------------------------------------------------------------------------|---------------------------------------------------------------------------------------------------------------------------------------------------------------------------------------------------------------------------------------------------------------------------------------------------------------------------------------------------------------------------------------------------------------|
| 108. Harms: Plans for collecting, assessing, reporting, managing anticipated/unanticipated adverse events provided? (reporting)                                                                  | Yes                                                                                                                                                                                                                                                                                                                                                                                                           |
|                                                                                                                                                                                                  | No                                                                                                                                                                                                                                                                                                                                                                                                            |
| 109. Auditing: Procedures of audits and/or external monitoring described (e.g. clinical trial unit/CROs)? (reporting)                                                                            | Yes                                                                                                                                                                                                                                                                                                                                                                                                           |
|                                                                                                                                                                                                  | No                                                                                                                                                                                                                                                                                                                                                                                                            |
|                                                                                                                                                                                                  | Not applicable                                                                                                                                                                                                                                                                                                                                                                                                |
| 110. Research Ethics Approval: Where approval has been obtained, or plans for seeking approval, provided? (should always be yes in this study) (reporting)                                       | Yes                                                                                                                                                                                                                                                                                                                                                                                                           |
|                                                                                                                                                                                                  | No                                                                                                                                                                                                                                                                                                                                                                                                            |
| 111. Protocol Amendments: Process for making amendments described? (reporting)                                                                                                                   | Yes                                                                                                                                                                                                                                                                                                                                                                                                           |
|                                                                                                                                                                                                  | No                                                                                                                                                                                                                                                                                                                                                                                                            |
| 112. Consent or Assent: Informed Consent process described? (reporting)                                                                                                                          | Yes                                                                                                                                                                                                                                                                                                                                                                                                           |
|                                                                                                                                                                                                  | No                                                                                                                                                                                                                                                                                                                                                                                                            |
| 113. Consent or Assent – Ancillary Studies: Process to obtain additional consent for collection and use of data and biological specimens described? (reporting)                                  | Yes                                                                                                                                                                                                                                                                                                                                                                                                           |
|                                                                                                                                                                                                  | No                                                                                                                                                                                                                                                                                                                                                                                                            |
|                                                                                                                                                                                                  | Not applicable                                                                                                                                                                                                                                                                                                                                                                                                |
| 114. Confidentiality: Described how data will be collected, kept secure, and maintained during the trial? (reporting)                                                                            | Yes                                                                                                                                                                                                                                                                                                                                                                                                           |
|                                                                                                                                                                                                  | No                                                                                                                                                                                                                                                                                                                                                                                                            |
| 115. Declaration of Interests: Financial and other competing interests clearly stated? (reporting)                                                                                               | Yes                                                                                                                                                                                                                                                                                                                                                                                                           |
|                                                                                                                                                                                                  | No                                                                                                                                                                                                                                                                                                                                                                                                            |
| 116. Access to data: Is it clearly mentioned who will have access to full dataset after trial completion? (reporting)                                                                            | Yes                                                                                                                                                                                                                                                                                                                                                                                                           |
|                                                                                                                                                                                                  | No                                                                                                                                                                                                                                                                                                                                                                                                            |
| 117. Ancillary and post-trial care: Any plans to provide or pay for ancillary care during the trial provided? (reporting)                                                                        | Yes                                                                                                                                                                                                                                                                                                                                                                                                           |
|                                                                                                                                                                                                  | No                                                                                                                                                                                                                                                                                                                                                                                                            |
| 118. Dissemination Policy: Plans to disseminate trial results to key stakeholders/publication provided? (reporting)                                                                              | Yes                                                                                                                                                                                                                                                                                                                                                                                                           |
|                                                                                                                                                                                                  | No                                                                                                                                                                                                                                                                                                                                                                                                            |
| 119. Dissemination Policy: Does the protocol mention any rules/regulations between the investigators and the sponsor with respect to the rights of publication of the trial results? (reporting) | Yes                                                                                                                                                                                                                                                                                                                                                                                                           |
|                                                                                                                                                                                                  | No                                                                                                                                                                                                                                                                                                                                                                                                            |
|                                                                                                                                                                                                  | Not applicable                                                                                                                                                                                                                                                                                                                                                                                                |
| If yes, please copy the corresponding statement from the protocol                                                                                                                                |                                                                                                                                                                                                                                                                                                                                                                                                               |
| If yes, which statement suits best?                                                                                                                                                              | <p>Only the sponsor retains the right to analyze and publish the data (no cooperation with investigators at all)</p> <p>The sponsor retains the right to approve any manuscript/abstract before publication (sponsor retains explicitly the right to reject submission for publication)</p> <p>The sponsor retains at least the right to review and comment on any manuscript/abstract before publication</p> |

|                                                                                                            |                                                                                                                                                                     |
|------------------------------------------------------------------------------------------------------------|---------------------------------------------------------------------------------------------------------------------------------------------------------------------|
|                                                                                                            | Free publication rights for the investigators, no constraints at all by the sponsor (sponsor has explicitly NOT the right to reject the submission for publication) |
|                                                                                                            | Protocol refers to a separate publication agreement between sponsor and investigator                                                                                |
|                                                                                                            | Other (Please enter description for other)                                                                                                                          |
| 120. Dissemination Policy: Authorship eligibility criteria described?                                      | Yes                                                                                                                                                                 |
|                                                                                                            | No                                                                                                                                                                  |
| 121. Dissemination Policy: Plans for granting access to full trial protocol provided? (reporting)          | Yes                                                                                                                                                                 |
|                                                                                                            | No                                                                                                                                                                  |
| 122. Informed Consent Materials: Model consent and/or assent forms provided (e.g in Appendix)? (reporting) | Yes                                                                                                                                                                 |
|                                                                                                            | No                                                                                                                                                                  |
| 123. Biological Specimens: Details of specimen collection provided? (reporting)                            | Yes                                                                                                                                                                 |
|                                                                                                            | No                                                                                                                                                                  |
|                                                                                                            | Not applicable                                                                                                                                                      |
| 124. Any comments?                                                                                         |                                                                                                                                                                     |

**Supplementary Table 2: Adherence to SPIRIT items in RCT protocols by approval year and median target sample size, multicentre vs single centre trials, and with vs without CTU or CRO support.**

| Characteristic                          | 2012                          |              |                            |              | 2016                          |              |                            |              |
|-----------------------------------------|-------------------------------|--------------|----------------------------|--------------|-------------------------------|--------------|----------------------------|--------------|
|                                         | median (IQR)                  | mean (SD)    | median (IQR)               | mean (SD)    | median (IQR)                  | mean (SD)    | median (IQR)               | mean (SD)    |
|                                         | Sample size <= 220 (n=117)    |              | Sample size > 220 (n=140)  |              | Sample size <= 220 (n=158)    |              | Sample size > 220 (n=134)  |              |
| Frequency of items per protocol         | 21.75 (18.25, 24.79)          | 21.13 (4.85) | 24.92 (22.81, 26.42)       | 24.33 (2.98) | 25.04 (22.17, 27.06)          | 23.98 (4.38) | 25.33 (23.06, 27.06)       | 24.88 (3.21) |
| <b>Proportion of items per protocol</b> | 0.66 (0.55, 0.75)             | 0.64 (0.15)  | 0.76 (0.69, 0.80)          | 0.74 (0.09)  | 0.76 (0.67, 0.82)             | 0.73 (0.13)  | 0.77 (0.70, 0.82)          | 0.75 (0.10)  |
|                                         | Single centre trial (n=47)    |              | Multicentre trial (n=210)  |              | Single centre trial (n=77)    |              | Multicentre trial (n=215)  |              |
| Frequency of items per protocol         | 18.79 (16.00, 22.67)          | 19.04 (5.03) | 24.42 (21.75, 26.25)       | 23.73 (3.53) | 24.67 (20.00, 27.17)          | 23.09 (5.08) | 25.25 (23.29, 27.04)       | 24.87 (3.28) |
| <b>Proportion of items per protocol</b> | 0.57 (0.48, 0.69)             | 0.58 (0.15)  | 0.74 (0.66, 0.80)          | 0.72 (0.11)  | 0.75 (0.61, 0.82)             | 0.70 (0.15)  | 0.77 (0.71, 0.82)          | 0.75 (0.10)  |
|                                         | No CTU or CRO support (n=108) |              | CTU or CRO support (n=149) |              | No CTU or CRO support (n=130) |              | CTU or CRO support (n=162) |              |
| Frequency of items per protocol         | 21.71 (18.31, 24.19)          | 20.92 (4.71) | 24.92 (22.58, 26.42)       | 24.29 (3.22) | 24.08 (20.21, 26.25)          | 22.92 (4.33) | 26.12 (23.92, 27.65)       | 25.59 (3.05) |
| <b>Proportion of items per protocol</b> | 0.66 (0.55, 0.73)             | 0.63 (0.14)  | 0.76 (0.68, 0.80)          | 0.74 (0.10)  | 0.73 (0.61, 0.80)             | 0.69 (0.13)  | 0.79 (0.72, 0.84)          | 0.78 (0.09)  |

Abbreviations: SPIRIT, Standard Protocol Items: Recommendations for Interventional Trials; RCT, randomised clinical trial; CTU, clinical trials unit; CRO, contract research organization; IQR, interquartile range; SD, standard deviation

**Supplementary Table 3: Adherence to SPIRIT items in RCT protocols by country and sponsorship**

| Characteristic                   | 2012                 |              |                      |              |                      |              | 2016                 |              |                      |              |                      |              |
|----------------------------------|----------------------|--------------|----------------------|--------------|----------------------|--------------|----------------------|--------------|----------------------|--------------|----------------------|--------------|
|                                  | Sponsorship          |              |                      |              | Total 2012 (n=257)   |              | Sponsorship          |              |                      |              | Total 2016 (n=292)   |              |
|                                  | Industry (n=138)     |              | Investigator (n=119) |              |                      |              | Industry (n=130)     |              | Investigator (n=162) |              |                      |              |
|                                  | median (IQR)         | mean (SD)    |                      |              |
| <b>Switzerland</b>               | Industry (n=91)      |              | Investigator (n=89)  |              | Total 2012 (n=180)   |              | Industry (n=86)      |              | Investigator (n=131) |              | Total 2016 (n=217)   |              |
| Frequency of items per protocol  | 26.08 (24.71, 27.08) | 25.52 (2.71) | 21.42 (18.33, 24.25) | 20.99 (4.61) | 24.49 (21.15, 26.44) | 23.28 (4.39) | 25.98 (24.35, 27.08) | 25.25 (3.05) | 26.08 (22.50, 27.67) | 24.81 (4.02) | 26.04 (23.50, 27.33) | 24.98 (3.67) |
| Proportion of items per protocol | 0.79 (0.75, 0.82)    | 0.77 (0.08)  | 0.65 (0.56, 0.74)    | 0.64 (0.14)  | 0.74 (0.64, 0.80)    | 0.71 (0.13)  | 0.79 (0.74, 0.82)    | 0.77 (0.09)  | 0.79 (0.68, 0.84)    | 0.75 (0.12)  | 0.79 (0.71, 0.83)    | 0.76 (0.11)  |
| <b>Germany</b>                   | Industry (n=26)      |              | Investigator (n=11)  |              | Total 2012 (n=37)    |              | Industry (n=27)      |              | Investigator (n=11)  |              | Total 2016 (n=38)    |              |
| Frequency of items per protocol  | 24.58 (22.96, 25.75) | 24.36 (1.88) | 19.50 (17.17, 23.54) | 19.28 (5.14) | 24.17 (21.92, 25.08) | 22.85 (3.92) | 23.92 (22.38, 25.25) | 22.74 (4.21) | 22.42 (19.38, 24.63) | 22.07 (3.76) | 23.58 (21.09, 25.21) | 22.55 (4.04) |
| Proportion of items per protocol | 0.75 (0.70, 0.78)    | 0.74 (0.06)  | 0.59 (0.52, 0.71)    | 0.58 (0.16)  | 0.73 (0.66, 0.76)    | 0.69 (0.12)  | 0.73 (0.68, 0.77)    | 0.69 (0.13)  | 0.68 (0.59, 0.75)    | 0.67 (0.11)  | 0.72 (0.64, 0.76)    | 0.68 (0.12)  |
| <b>Canada</b>                    | Industry (n=21)      |              | Investigator (n=19)  |              | Total 2012 (n=40)    |              | Industry (n=17)      |              | Investigator (n=20)  |              | Total 2016 (n=37)    |              |
| Frequency of items per protocol  | 22.83 (21.42, 24.42) | 22.56 (2.70) | 19.42 (18.17, 22.29) | 19.48 (3.45) | 21.75 (19.22, 23.15) | 21.10 (3.41) | 25.92 (23.67, 27.08) | 25.37 (1.93) | 20.04 (17.98, 23.65) | 20.71 (4.45) | 23.67 (20.00, 26.00) | 22.85 (4.20) |
| Proportion of items per protocol | 0.69 (0.65, 0.74)    | 0.68 (0.08)  | 0.59 (0.55, 0.68)    | 0.59 (0.10)  | 0.66 (0.58, 0.70)    | 0.64 (0.10)  | 0.79 (0.72, 0.82)    | 0.77 (0.06)  | 0.61 (0.55, 0.72)    | 0.63 (0.14)  | 0.72 (0.61, 0.79)    | 0.69 (0.13)  |

1  
2  
3  
4  
5  
6  
7  
8  
9  
10  
11  
12  
13  
14  
15  
16  
17  
18  
19  
20  
21  
22  
23  
24  
25  
26  
27  
28  
29  
30  
31  
32  
33  
34  
35  
36  
37  
38  
39  
40  
41  
42  
43  
44  
45  
46

Abbreviations: SPIRIT, Standard Protocol Items: Recommendations for Interventional Trials; RCT, randomised clinical trial; IQR, interquartile range; SD, standard deviation

For peer review only



**Supplementary Table 4: Sensitivity analyses of calculating the adherence to SPIRIT items for RCT protocols by sponsorship**

| Characteristic                                                | 2012                       |              |                                |              |                      |              | 2016                       |              |                                |              |                      |              |
|---------------------------------------------------------------|----------------------------|--------------|--------------------------------|--------------|----------------------|--------------|----------------------------|--------------|--------------------------------|--------------|----------------------|--------------|
|                                                               | Industry-sponsored (n=138) |              | Investigator-sponsored (n=119) |              | Total 2012 (n=257)   |              | Industry-sponsored (n=130) |              | Investigator-sponsored (n=162) |              | Total 2016 (n=292)   |              |
|                                                               | median (IQR)               | mean (SD)    | median (IQR)                   | mean (SD)    | median (IQR)         | mean (SD)    | median (IQR)               | mean (SD)    | median (IQR)                   | mean (SD)    | median (IQR)         | mean (SD)    |
| <b>Major Item approach (simple) NA=0</b>                      |                            |              |                                |              |                      |              |                            |              |                                |              |                      |              |
| Frequency of items per protocol                               | 18.00 (17.00, 20.00)       | 18.04 (2.99) | 13.00 (11.00, 16.00)           | 13.48 (4.27) | 17.00 (13.00, 19.00) | 15.93 (4.29) | 18.00 (16.00, 20.00)       | 18.12 (3.44) | 17.00 (14.00, 19.00)           | 16.40 (4.08) | 18.00 (15.00, 20.00) | 17.16 (3.89) |
| Proportion of items per protocol                              | 0.56 (0.52, 0.61)          | 0.55 (0.09)  | 0.42 (0.33, 0.50)              | 0.41 (0.13)  | 0.52 (0.41, 0.58)    | 0.49 (0.13)  | 0.56 (0.50, 0.62)          | 0.56 (0.10)  | 0.53 (0.42, 0.59)              | 0.51 (0.12)  | 0.55 (0.47, 0.61)    | 0.53 (0.12)  |
| <b>Major Item approach (simple) NA=1</b>                      |                            |              |                                |              |                      |              |                            |              |                                |              |                      |              |
| Frequency of items per protocol                               | 22.00 (20.00, 23.00)       | 21.14 (3.20) | 16.00 (14.00, 19.00)           | 16.39 (4.76) | 20.00 (16.00, 22.00) | 18.95 (4.64) | 22.00 (20.00, 24.00)       | 21.25 (3.68) | 21.00 (17.00, 24.00)           | 20.19 (4.73) | 21.00 (18.00, 24.00) | 20.66 (4.32) |
| Proportion of items per protocol                              | 0.67 (0.61, 0.70)          | 0.64 (0.10)  | 0.48 (0.42, 0.58)              | 0.50 (0.14)  | 0.61 (0.48, 0.67)    | 0.57 (0.14)  | 0.67 (0.61, 0.73)          | 0.64 (0.11)  | 0.64 (0.52, 0.73)              | 0.61 (0.14)  | 0.64 (0.55, 0.73)    | 0.63 (0.13)  |
| <b>Major item approach (allowing for partial credit) NA=0</b> |                            |              |                                |              |                      |              |                            |              |                                |              |                      |              |
| Frequency of items per protocol                               | 24.75 (22.75, 26.17)       | 24.22 (2.86) | 19.47 (16.59, 22.27)           | 19.19 (4.91) | 22.87 (19.29, 25.42) | 21.88 (4.68) | 24.50 (22.40, 26.21)       | 23.89 (3.64) | 23.92 (19.85, 25.83)           | 22.72 (4.44) | 24.25 (21.25, 26.08) | 23.24 (4.14) |

|                                                               |                      |              |                      |              |                      |              |                      |              |                      |              |                      |              |
|---------------------------------------------------------------|----------------------|--------------|----------------------|--------------|----------------------|--------------|----------------------|--------------|----------------------|--------------|----------------------|--------------|
| Proportion of items per protocol                              | 0.76 (0.70, 0.80)    | 0.74 (0.08)  | 0.60 (0.51, 0.69)    | 0.59 (0.15)  | 0.71 (0.60, 0.78)    | 0.67 (0.14)  | 0.76 (0.69, 0.80)    | 0.73 (0.11)  | 0.74 (0.60, 0.80)    | 0.70 (0.14)  | 0.74 (0.66, 0.80)    | 0.72 (0.13)  |
| <b>Major item approach (allowing for partial credit) NA=1</b> |                      |              |                      |              |                      |              |                      |              |                      |              |                      |              |
| Frequency of items per protocol                               | 25.46 (23.58, 26.50) | 24.85 (2.77) | 21.25 (18.25, 23.67) | 20.59 (4.52) | 23.67 (20.67, 26.17) | 22.88 (4.25) | 25.33 (23.67, 26.91) | 24.75 (3.35) | 25.00 (21.24, 27.31) | 24.12 (4.29) | 25.25 (22.50, 27.08) | 24.40 (3.90) |
| Proportion of items per protocol                              | 0.77 (0.71, 0.80)    | 0.75 (0.08)  | 0.64 (0.55, 0.72)    | 0.62 (0.14)  | 0.72 (0.63, 0.79)    | 0.69 (0.13)  | 0.77 (0.72, 0.82)    | 0.75 (0.10)  | 0.76 (0.64, 0.83)    | 0.73 (0.13)  | 0.77 (0.68, 0.82)    | 0.74 (0.12)  |
| <b>All item approach NA=0</b>                                 |                      |              |                      |              |                      |              |                      |              |                      |              |                      |              |
| Frequency of items per protocol                               | 43.00 (40.25, 46.00) | 42.38 (5.26) | 35.00 (30.00, 40.00) | 34.57 (8.33) | 41.00 (35.00, 44.00) | 38.76 (7.87) | 42.00 (40.00, 45.75) | 41.65 (6.46) | 41.00 (35.00, 45.00) | 39.69 (7.91) | 42.00 (37.75, 45.00) | 40.57 (7.35) |
| Proportion of items per protocol                              | 0.73 (0.69, 0.78)    | 0.73 (0.08)  | 0.62 (0.53, 0.70)    | 0.60 (0.14)  | 0.70 (0.61, 0.76)    | 0.67 (0.13)  | 0.73 (0.68, 0.78)    | 0.71 (0.11)  | 0.73 (0.62, 0.79)    | 0.70 (0.13)  | 0.73 (0.65, 0.78)    | 0.71 (0.12)  |
| <b>All item approach NA=1</b>                                 |                      |              |                      |              |                      |              |                      |              |                      |              |                      |              |
| Frequency of items per protocol                               | 49.00 (46.00, 51.75) | 48.27 (4.71) | 43.00 (37.00, 46.00) | 41.42 (7.80) | 46.00 (42.00, 50.00) | 45.10 (7.18) | 48.50 (45.00, 51.00) | 47.45 (5.94) | 49.00 (42.25, 52.00) | 46.95 (7.42) | 49.00 (44.00, 52.00) | 47.17 (6.80) |
| Proportion of items per protocol                              | 0.77 (0.72, 0.81)    | 0.75 (0.07)  | 0.67 (0.58, 0.72)    | 0.65 (0.12)  | 0.72 (0.66, 0.78)    | 0.70 (0.11)  | 0.76 (0.70, 0.80)    | 0.74 (0.09)  | 0.77 (0.66, 0.81)    | 0.73 (0.12)  | 0.77 (0.69, 0.81)    | 0.74 (0.11)  |

Abbreviations: IQR, interquartile range; NA, not applicable (SPIRIT items with rating "not applicable"); SD, standard deviation

**Supplementary Table 5: Adherence to individual SPIRIT items by year and sponsorship**

| Variable                                                                     | Spirit Item Number | 2012                          |                                  |                    | 2016                         |                                  |                    |
|------------------------------------------------------------------------------|--------------------|-------------------------------|----------------------------------|--------------------|------------------------------|----------------------------------|--------------------|
|                                                                              |                    | Industry sponsorship (n=138 ) | Investigator sponsorship (n=119) | Total 2012 (n=257) | Industry sponsorship (n=130) | Investigator sponsorship (n=162) | Total 2016 (n=292) |
| Basic study design in Title                                                  | 1                  | 116 (84.1%)                   | 47 (39.5%)                       | 163 (63.4%)        | 108 (83.1%)                  | 57 (35.2%)                       | 165 (56.5%)        |
| Trial registration                                                           | 2                  | 109 (79.0%)                   | 43 (36.1%)                       | 152 (59.1%)        | 111 (85.4%)                  | 125 (77.2%)                      | 236 (80.8%)        |
| Protocol version, number and date                                            | 3                  | 131 (94.9%)                   | 100 (84.0%)                      | 231 (89.9%)        | 127 (97.7%)                  | 155 (95.7%)                      | 282 (96.6%)        |
| Funding sources                                                              | 4                  | 123 (89.1%)                   | 70 (58.8%)                       | 193 (75.1%)        | 122 (93.8%)                  | 120 (74.1%)                      | 242 (82.9%)        |
| Names of protocol contributors/ authors                                      | 5a                 | 30 (21.7%)                    | 36 (30.3%)                       | 66 (25.7%)         | 20 (15.4%)                   | 30 (18.5%)                       | 50 (17.1%)         |
| Name and contact details of sponsor                                          | 5b                 | 110 (79.7%)                   | 82 (68.9%)                       | 192 (74.7%)        | 91 (70.0%)                   | 136 (84.0%)                      | 227 (77.7%)        |
| Role of sponsor and funder in trial                                          | 5c                 | 112 (81.2%)                   | 39 (32.8%)                       | 151 (58.8%)        | 70 (53.8%)                   | 43 (26.5%)                       | 113 (38.7%)        |
| Steering Committee General Membership and Role                               | 5d                 | 125 (90.6%)                   | 107 (89.9)                       | 232 (90.3%)        | 113 (86.9%)                  | 156 (96.3%)                      | 269 (92.1%)        |
| Of which Not Applicable                                                      |                    | 94 (75.2%)                    | 72 (67.3%)                       | 164 (71.6%)        | 90 (79.6%)                   | 109 (69.9%)                      | 199 (74.0%)        |
| Research question described and justified                                    | 6a                 | 25 (18.1%)                    | 31 (26.1%)                       | 56 (21.8%)         | 22 (16.9%)                   | 54 (33.3%)                       | 76 (26.0%)         |
| Comparator choice explained                                                  | 6b                 | 108 (78.3%)                   | 88 (73.9%)                       | 196 (76.3%)        | 105 (80.8%)                  | 137 (84.6%)                      | 242 (82.9%)        |
| Specific objectives described                                                | 7                  | 133 (96.4%)                   | 107 (89.9%)                      | 240 (93.4%)        | 125 (96.2%)                  | 149 (92.0%)                      | 274 (93.8%)        |
| Trial design described                                                       | 8                  | 127 (92.0%)                   | 80 (67.2%)                       | 207 (80.5%)        | 115 (88.5%)                  | 132 (81.5%)                      | 247 (84.6%)        |
| Countries where data will be collected listed                                | 9                  | 71 (51.4%)                    | 94 (79.0%)                       | 165 (64.2%)        | 19 (14.6%)                   | 144 (88.9%)                      | 163 (55.8%)        |
| Eligibility criteria for trial participants                                  | 10                 | 138 (100.0%)                  | 116 (97.5%)                      | 254 (98.8%)        | 130 (100.0%)                 | 162 (100.0%)                     | 292 (100.0%)       |
| Eligibility criteria for study centres and who will perform the intervention | 10                 | 15 (10.9%)                    | 58 (48.7%)                       | 73 (28.4%)         | 12 (9.2%)                    | 98 (60.5%)                       | 110 (37.7%)        |

|                                                        |     |              |             |             |             |             |             |
|--------------------------------------------------------|-----|--------------|-------------|-------------|-------------|-------------|-------------|
| Of which Not Applicable                                |     | 1 (6.7%)     | 39 (67.2%)  | 40 (54.8%)  | 2 (16.7%)   | 68 (69.4%)  | 70 (63.6%)  |
| Individuals administering interventions (non-drug)     | 10  | 131 (94.9%)  | 93 (78.2%)  | 224 (87.2%) | 120 (92.3%) | 131 (80.9%) | 251 (86.0%) |
| Of which Not Applicable                                |     | 119 (90.8%)  | 49 (52.7%)  | 168 (75.0%) | 106 (88.3%) | 65 (49.6%)  | 171 (68.1%) |
| Generic Name, Dose and Schedule of intervention        | 11a | 135 (97.8%)  | 118 (99.2%) | 253 (98.4%) | 130 (100%)  | 161 (99.4%) | 291 (99.7%) |
| Of which Not Applicable                                |     | 16 (11.9%)   | 63 (53.4%)  | 79 (31.2%)  | 19 (14.6%)  | 95 (59.0%)  | 114 (39.2%) |
| Setting of intervention administration                 | 11a | 129 (93.5%)  | 103 (86.6%) | 232 (90.3%) | 118 (90.8%) | 147 (90.7%) | 265 (90.8%) |
| Of which Not Applicable                                |     | 118 (91.5%)  | 49 (47.6%)  | 167 (72.0%) | 106 (89.8%) | 62 (42.2%)  | 168 (63.4%) |
| Criteria for modifications of interventions            | 11b | 114 (82.6%)  | 85 (71.4%)  | 199 (77.4%) | 111 (85.4%) | 128 (79.0%) | 239 (81.8%) |
| Of which Not Applicable                                |     | 13 (11.4%)   | 32 (37.7%)  | 45 (22.6%)  | 10 (9.0%)   | 35 (27.3%)  | 45 (18.8%)  |
| Strategies to improve or monitoring of adherence       | 11c | 123 (89.1%)  | 95 (79.8%)  | 218 (84.8%) | 107 (82.3%) | 144 (88.9%) | 251 (86.0%) |
| Of which Not Applicable                                |     | 44 (35.8%)   | 66 (69.5%)  | 110 (50.5%) | 33 (30.8%)  | 78 (54.2%)  | 111 (44.2%) |
| Permitted concomitant care                             | 11d | 130 (94.2%)  | 61 (51.3%)  | 191 (74.3%) | 124 (95.4%) | 112 (69.1%) | 236 (80.8%) |
| Primary Outcome: Specific measurement variable         | 12  | 138 (100%)   | 113 (95.0%) | 251 (97.7%) | 129 (99.2%) | 153 (94.4%) | 282 (96.6%) |
| Of which Not Applicable                                |     | 1 (0.7%)     | 0 (0%)      | 1 (0.4%)    | 0 (0%)      | 0 (0%)      | 0 (0%)      |
| Primary Outcome: Analysis metric                       | 12  | 132 (95.7%)  | 101 (84.9%) | 233 (90.7%) | 124 (95.4%) | 140 (86.4%) | 264 (90.4%) |
| Of which Not Applicable                                |     | 3 (2.3%)     | 0 (0%)      | 3 (1.3%)    | 1 (0.8%)    | 0 (0%)      | 1 (0.4%)    |
| Primary Outcomes: time point of measurement            | 12  | 132 (95.7%)  | 105 (88.2%) | 237 (92.2%) | 124 (95.4%) | 149 (92.0%) | 273 (93.5%) |
| Of which Not Applicable                                |     | 40 (30.3%)   | 20 (19.1%)  | 60 (25.3%)  | 26 (21.0%)  | 20 (13.4%)  | 46 (16.9%)  |
| Participant timeline                                   | 13  | 136 (98.6%)  | 113 (95.0%) | 249 (96.9%) | 130 (100%)  | 154 (95.1%) | 284 (97.3%) |
| Sample size: Estimated number                          | 14  | 138 (100.0%) | 116 (97.5%) | 254 (98.8%) | 128 (98.5%) | 161 (99.4%) | 289 (99.0%) |
| Sample size: Outcome used for samples size calculation | 14  | 135 (97.8%)  | 107 (89.9%) | 242 (94.2%) | 127 (97.7%) | 148 (91.4%) | 275 (94.2%) |
| Of which Not Applicable                                |     | 7 (5.2%)     | 3 (2.8%)    | 10 (4.1%)   | 4 (3.2%)    | 7 (4.7%)    | 11 (4.0%)   |

|                                                                       |     |             |             |             |             |             |             |
|-----------------------------------------------------------------------|-----|-------------|-------------|-------------|-------------|-------------|-------------|
| Sample size:<br>Assumed values for outcome                            | 14  | 122 (88.4%) | 89 (74.8%)  | 211 (82.1%) | 111 (85.4%) | 116 (71.6%) | 227 (77.7%) |
| Of which Not Applicable                                               |     | 6 (4.9%)    | 5 (5.6%)    | 11 (5.2%)   | 4 (3.6%)    | 7 (6.0%)    | 11 (4.9%)   |
| Sample size:<br>Alpha value                                           | 14  | 131 (94.9%) | 106 (89.1%) | 237 (92.2%) | 126 (96.9%) | 150 (92.6%) | 276 (94.5%) |
| Of which Not Applicable                                               |     | 7 (5.3%)    | 3 (2.8%)    | 10 (4.2%)   | 4 (3.2%)    | 7 (4.7%)    | 11 (4.0%)   |
| Sample size:<br>Statistical Power                                     | 14  | 134 (97.1%) | 111 (93.3%) | 245 (95.3%) | 128 (98.5%) | 153 (94.4%) | 281 (96.2%) |
| Of which Not Applicable                                               |     | 7 (5.2%)    | 3 (2.7%)    | 10 (4.1%)   | 4 (3.1%)    | 7 (4.6%)    | 11 (3.9%)   |
| Sample size:<br>Rationale sample size if not derived<br>statistically | 14  | 137 (99.3%) | 110 (92.4%) | 247 (96.1%) | 127 (97.7%) | 158 (97.5%) | 285 (97.6%) |
| Of which Not Applicable                                               |     | 130 (94.9%) | 110 (100%)  | 240 (97.2%) | 123 (96.9%) | 155 98.1%   | 278 (97.5%) |
| Location of<br>participant recruitment                                | 15  | 24 (17.4%)  | 78 (65.5%)  | 102 (39.7%) | 17 (13.1%)  | 112 (69.1%) | 129 (44.2%) |
| Person(s) who<br>will recruit participants                            | 15  | 40 (29.0%)  | 52 (43.7%)  | 92 (35.8%)  | 33 (25.4%)  | 91 (56.2%)  | 124 (42.5%) |
| Expected recruitment rate                                             | 15  | 37 (26.8%)  | 52 (43.7%)  | 89 (34.6%)  | 13 (10.0%)  | 39 (24.1%)  | 52 (17.8%)  |
| Method for generation<br>of random sequence                           | 16a | 89 (64.5%)  | 63 (52.9%)  | 152 (59.1%) | 68 (52.3%)  | 109 (67.3%) | 177 (60.6%) |
| Allocation concealment<br>mechanism                                   | 16b | 126 (91.3%) | 80 (67.2%)  | 206 (80.2%) | 113 (86.9%) | 130 (80.2%) | 243 (83.2%) |
| Of which Not Applicable                                               |     | 8 (6.4%)    | 3 (3.8%)    | 11 (5.3%)   | 1 (0.9%)    | 3 (2.3%)    | 4 (1.7%)    |
| Person who will<br>enroll/assign participants                         | 16c | 59 (42.8%)  | 44 (37.0%)  | 103 (40.1%) | 50 (38.5%)  | 79 (48.8%)  | 129 (44.2%) |
| Of which Not Applicable                                               |     | 0 (0%)      | 2 (4.6%)    | 2 (1.9%)    | 1 (2%)      | 1 (1.3%)    | 2 (1.6%)    |
| Blinding status<br>of participants                                    | 17a | 133 (96.4%) | 97 (81.5%)  | 230 (89.5%) | 128 (98.5%) | 148 (91.4%) | 276 (94.5%) |
| Blinding status<br>of care providers                                  | 17a | 134 (97.1%) | 97 (81.5%)  | 231 (89.9%) | 127 (97.7%) | 148 (91.4%) | 275 (94.2%) |
| Blinding status<br>of outcome assessors                               | 17a | 103 (74.6%) | 71 (59.7%)  | 174 (67.7%) | 94 (72.3%)  | 105 (64.8%) | 199 (68.2%) |
| Conditions when<br>unblinding is permissible                          | 17b | 127 (92.0%) | 92 (77.3%)  | 219 (85.2%) | 120 (82.3%) | 142 (87.7%) | 262 (89.7%) |
| Of which Not Applicable                                               |     | 34 (26.8%)  | 66 (71.7%)  | 100 (45.7%) | 36 (30%)    | 91 (64.1%)  | 127 (48.5%) |

|                                                                                              |     |             |             |             |             |             |             |
|----------------------------------------------------------------------------------------------|-----|-------------|-------------|-------------|-------------|-------------|-------------|
| Personnel who will collect data                                                              | 18a | 58 (42.0%)  | 52 (43.7%)  | 110 (42.8%) | 61 (46.9%)  | 96 (59.3%)  | 157 (53.8%) |
| Strategies to promote participant retention and complete follow-up                           | 18b | 84 (60.9%)  | 34 (28.6%)  | 118 (45.9%) | 80 (61.5%)  | 64 (39.5%)  | 144 (49.3%) |
| Data entry and coding                                                                        | 19  | 106 (76.8%) | 64 (53.8%)  | 170 (66.1%) | 102 (78.5%) | 117 (72.2%) | 219 (75.0%) |
| Main analysis for primary outcome                                                            | 20a | 131 (94.9%) | 96 (80.7%)  | 227 (88.3%) | 121 (93.1%) | 132 (81.5%) | 253 (86.6%) |
| Definition of subgroup categories                                                            | 20b | 117 (84.8%) | 98 (82.4%)  | 215 (83.7%) | 108 (83.1%) | 148 (91.4%) | 256 (87.7%) |
| Of which Not Applicable                                                                      |     | 60 (51.3%)  | 79 (80.6%)  | 139 (64.7%) | 63 (58.3%)  | 116 (78.4%) | 179 (69.9%) |
| Definition of analysis population                                                            | 20c | 125 (90.6%) | 49 (41.2%)  | 174 (67.7%) | 120 (92.3%) | 96 (59.3%)  | 216 (74.0%) |
| DMC is planned or why it is not planned                                                      | 21a | 102 (73.9%) | 49 (41.2%)  | 151 (58.8%) | 97 (74.6%)  | 72 (44.4%)  | 169 (57.9%) |
| Who has authority to stop the trial                                                          | 21b | 111 (80.4%) | 73 (61.3%)  | 184 (71.6%) | 111 (85.4%) | 112 (69.1%) | 223 (76.4%) |
| Anticipated/unanticipated adverse events collection                                          | 22  | 136 (98.6%) | 91 (76.5%)  | 227 (88.3%) | 127 (97.7%) | 138 (85.2%) | 265 (90.8%) |
| Audits/external monitoring described                                                         | 23  | 106 (76.8%) | 49 (41.2%)  | 155 (60.3%) | 109 (83.8%) | 112 (69.1%) | 221 (75.7%) |
| Of which Not Applicable                                                                      |     | 0 (0%)      | 3 (6.1%)    | 3 (1.9%)    | 3 (2.8%)    | 15 (13.4%)  | 18 (8.2%)   |
| Research ethics approval                                                                     | 24  | 138 (100%)  | 118 (100%)  | 256 (100%)  | 130 (100%)  | 162 (100%)  | 292 (100%)  |
| Process for making amendments described                                                      | 25  | 106 (76.8%) | 48 (40.3%)  | 154 (59.9%) | 103 (79.2%) | 121 (74.7%) | 224 (76.7%) |
| Informed Consent process described                                                           | 26a | 119 (86.2%) | 77 (64.7%)  | 196 (76.3%) | 110 (84.6%) | 139 (85.8%) | 249 (85.3%) |
| Process to obtain additional consent for collection and use of data and biological specimens | 26b | 123 (89.1%) | 103 (86.6%) | 226 (87.9%) | 111 (85.4%) | 151 (93.2%) | 262 (89.7%) |
| Of which Not Applicable                                                                      |     | 70 (56.9%)  | 87 (84.5%)  | 157 (69.5%) | 65 (58.6%)  | 126 (83.4%) | 191 (72.9%) |
| Confidentiality of data                                                                      | 27  | 125 (90.6%) | 88 (73.9%)  | 213 (82.9%) | 114 (87.7%) | 144 (88.9%) | 258 (88.4%) |
| Declaration of Interests                                                                     | 28  | 54 (39.1%)  | 27 (22.7%)  | 81 (31.5%)  | 94 (72.3%)  | 88 (54.3%)  | 182 (62.3%) |
| Who will have access to full dataset                                                         | 29  | 29 (21.0%)  | 23 (19.3%)  | 52 (20.2%)  | 37 (28.5%)  | 56 (34.6%)  | 93 (31.8%)  |

|                                                                             |     |             |             |             |             |             |             |
|-----------------------------------------------------------------------------|-----|-------------|-------------|-------------|-------------|-------------|-------------|
| Ancillary and post-trial care                                               | 30  | 61 (44.2%)  | 39 (32.8%)  | 100 (38.9%) | 50 (38.5%)  | 44 (27.2%)  | 94 (32.2%)  |
| Plans to disseminate trial results to key stakeholders/publication provided | 31a | 72 (52.2%)  | 51 (42.9%)  | 123 (47.9%) | 77 (59.2%)  | 129 (79.6%) | 206 (70.5%) |
| Authorship eligibility criteria                                             | 31b | 50 (36.2%)  | 30 (25.2%)  | 80 (31.1%)  | 41 (31.5%)  | 57 (35.2%)  | 98 (33.6%)  |
| Plans for granting access to full trial protocol                            | 31c | 7 (5.1%)    | 2 (1.7%)    | 9 (3.5%)    | 4 (3.1%)    | 13 (8.0%)   | 17 (5.8%)   |
| Consent forms provided                                                      | 32  | 133 (96.4%) | 118 (99.2%) | 251 (97.7%) | 125 (96.2%) | 157 (96.9%) | 282 (96.6%) |
| Details of specimen collection                                              | 33  | 126 (91.3%) | 99 (83.2)   | 225 (87.5%) | 120 (92.3%) | 152 (93.8%) | 272 (93.2%) |
| Of which Not Applicable                                                     |     | 35 (27.8%)  | 61 (61.6%)  | 96 (42.7%)  | 53 (44.2%)  | 109 (71.7%) | 162 (59.6%) |

For peer review only

1  
2  
3  
4  
5  
6  
7  
8  
9  
10  
11  
12  
13  
14  
15  
16  
17  
18  
19  
20  
21  
22  
23  
24  
25  
26  
27  
28  
29  
30  
31  
32  
33  
34  
35  
36  
37  
38  
39  
40  
41  
42  
43  
44  
45  
46

**Supplementary Table 6: Adherence to SPIRIT items in Investigator-sponsored protocols that improved by 10% or more**

|                                                                              |                    | 2012        | 2016        |
|------------------------------------------------------------------------------|--------------------|-------------|-------------|
| Variable                                                                     | Spirit Item Number | Yes         | Yes         |
| Trial registration                                                           | 2                  | 43 (36.1%)  | 125 (77.2%) |
| Protocol version, number and date                                            | 3                  | 100 (84.0%) | 155 (95.7%) |
| Funding sources                                                              | 4                  | 70 (58.8%)  | 120 (74.1%) |
| Name and contact details of sponsor                                          | 5b                 | 82 (68.9%)  | 136 (84.0%) |
| Comparator choice explained                                                  | 6b                 | 88 (73.9%)  | 137 (84.6%) |
| Trial design described                                                       | 8                  | 80 (67.2%)  | 132 (81.5%) |
| Eligibility criteria for study centres and who will perform the intervention | 10                 | 58 (48.7%)  | 98 (60.5%)  |
| Of which Not Applicable                                                      |                    | 39 (67.2%)  | 68 (69.4%)  |
| Permitted concomitant care                                                   | 11d                | 61 (51.3%)  | 112 (69.1%) |
| Person(s) who will recruit participants                                      | 15                 | 52 (43.7%)  | 91 (56.2%)  |
| Method for generation of random sequence                                     | 16a                | 63 (52.9%)  | 109 (67.3%) |
| Allocation concealment mechanism                                             | 16b                | 80 (67.2%)  | 130 (80.3%) |
| Of which Not Applicable                                                      |                    | 3 (3.8%)    | 3 (2.3%)    |
| Person who will enroll/assign participants                                   | 16c                | 44 (37.0%)  | 79 (48.8%)  |
| Of which Not Applicable                                                      |                    | 2 (1.4%)    | 1 (1.3%)    |
| Personnel who will collect data                                              | 18a                | 52 (43.7%)  | 96 (59.3%)  |
| Strategies to promote participant retention and complete follow-up           | 18b                | 34 (28.6%)  | 64 (39.5%)  |
| Data entry and coding                                                        | 19                 | 64 (53.8%)  | 117 (72.2%) |
| Definition of analysis population                                            | 20c                | 49 (41.2%)  | 96 (59.3%)  |
| Audits/external monitoring described                                         | 23                 | 49 (41.2%)  | 112 (69.1%) |
| Of which Not Applicable                                                      |                    | 3 (6.1%)    | 15 (13.4%)  |
| Process for making amendments described                                      | 25                 | 48 (40.3%)  | 121 (74.7%) |
| Informed Consent process described                                           | 26a                | 77 (64.7%)  | 139 (85.8%) |
| Confidentiality of data                                                      | 27                 | 88 (73.9%)  | 144 (88.9%) |
| Declaration of Interests                                                     | 28                 | 27 (22.7%)  | 88 (54.3%)  |
| Who will have access to full dataset                                         | 29                 | 23 (19.3%)  | 56 (34.6%)  |
| Plans to disseminate trial results to key stakeholders/publication provided  | 31a                | 51 (42.9%)  | 129 (79.6%) |



1  
2  
3  
4  
5  
6  
7  
8  
9  
10  
11  
12  
13  
14  
15  
16  
17  
18  
19  
20  
21  
22  
23  
24  
25  
26  
27  
28  
29  
30  
31  
32  
33  
34  
35  
36  
37  
38  
39  
40  
41  
42  
43  
44  
45  
46  
47  
48  
49  
50  
51  
52  
53  
54  
55  
56  
57  
58  
59  
60

|                                 |     |            |             |
|---------------------------------|-----|------------|-------------|
| Authorship eligibility criteria | 31b | 30 (25.2%) | 57 (35.2%)  |
| Details of specimen collection  | 33  | 99 (83.2%) | 152 (93.8)  |
| Of which Not Applicable         |     | 61 (61.6%) | 109 (71.7%) |

For peer review only

**Supplementary Table 7: Results from multivariable Beta and Logistic regressions for all approaches**

| Approach                          | Independent Variable             | Beta Regression              |            |            | Likelihood ratio |       | Logistic regression with Protocol as random effect |             |             | Likelihood ratio |       |
|-----------------------------------|----------------------------------|------------------------------|------------|------------|------------------|-------|----------------------------------------------------|-------------|-------------|------------------|-------|
|                                   |                                  | Odds Ratio                   | CI         | p value    | Chisq            | p     | Odds Ratio                                         | CI          | p value     | Chisq            | p     |
| Major Item approach (simple) NA=0 | Sample size in 1000 increments   | 1.01                         | 0.99- 1.03 | 0.235      | -                | -     | 1.00                                               | 0.98 – 1.02 | 0.747       | -                | -     |
|                                   | Multicentre study                | 1.29                         | 1.17- 1.43 | <.001      | -                | -     | 1.21                                               | 1.08 – 1.36 | 0.001       | -                | -     |
|                                   | CTU or CRO support               | 1.35                         | 1.25- 1.45 | <.001      | -                | -     | 1.42                                               | 1.29 – 1.56 | <.001       | -                | -     |
|                                   | Industry sponsorship             | 1.23                         | 1.14- 1.34 | <.001      | -                | -     | 1.36                                               | 1.23 – 1.51 | <.001       | -                | -     |
|                                   | Year 2016                        | 1.25                         | 1.16- 1.35 | <.001      | -                | -     | 1.26                                               | 1.15 – 1.38 | <.001       | -                | -     |
|                                   | Interaction term                 | Sponsorship:Year interaction | 0.71       | 0.61- 0.81 | <.001            | 22.24 | <.001                                              | 0.69        | 0.58 – 0.83 | <.001            | 16.21 |
|                                   | CTU/CRO support:Year interaction | 0.91                         | 0.78- 1.05 | 0.190      | 1.72             | 0.190 | 0.87                                               | 0.73 – 1.04 | 0.118       | 2.43             | 0.119 |
| Major Item approach (simple) NA=1 | Sample size in 1000 increments   | 1.01                         | 0.99- 1.03 | 0.233      | -                | -     | 0.99                                               | 0.97 – 1.02 | 0.654       | -                | -     |
|                                   | Multicentre study                | 1.22                         | 1.08- 1.37 | 0.001      | -                | -     | 1.16                                               | 1.02 – 1.31 | 0.022       | -                | -     |
|                                   | CTU or CRO support               | 1.42                         | 1.30- 1.55 | <.001      | -                | -     | 1.46                                               | 1.32 – 1.60 | <.001       | -                | -     |
|                                   | Industry sponsorship             | 1.23                         | 1.11- 1.35 | <.001      | -                | -     | 1.34                                               | 1.21 – 1.50 | <.001       | -                | -     |
|                                   | Year 2016                        | 1.32                         | 1.21- 1.43 | <.001      | -                | -     | 1.34                                               | 1.22 – 1.48 | <.001       | -                | -     |
|                                   | Interaction term                 | Sponsorship:Year interaction | 0.64       | 0.55- 0.76 | <.001            | 26.27 | <.001                                              | 0.67        | 0.55 – 0.81 | <.001            | 17.32 |
|                                   | CTU/CRO support:Year interaction | 0.99                         | 0.83- 1.17 | 0.881      | 0.02             | 0.881 | 0.90                                               | 0.75 – 1.09 | 0.292       | 1.10             | 0.294 |

|                                                        |                                  |      |            |       |       |       |      |             |       |       |       |
|--------------------------------------------------------|----------------------------------|------|------------|-------|-------|-------|------|-------------|-------|-------|-------|
| Major item approach (allowing for partial credit) NA=0 | Sample size in 1000 increments   | 1.01 | 0.99- 1.03 | 0.290 | -     | -     | -    | -           | -     | -     | -     |
|                                                        | Multicentre study                | 1.22 | 1.08- 1.38 | 0.001 | -     | -     | -    | -           | -     | -     | -     |
|                                                        | CTU or CRO support               | 1.43 | 1.31- 1.57 | <.001 | -     | -     | -    | -           | -     | -     | -     |
|                                                        | Industry sponsorship             | 1.25 | 1.13- 1.38 | <.001 | -     | -     | -    | -           | -     | -     | -     |
|                                                        | Year 2016                        | 1.33 | 1.21- 1.46 | <.001 | -     | -     | -    | -           | -     | -     | -     |
| Interaction term                                       | Sponsorship:Year interaction     | 0.60 | 0.50- 0.71 | <.001 | 31.48 | <.001 | -    | -           | -     | -     | -     |
|                                                        | CTU/CRO support:Year interaction | 0.94 | 0.79- 1.13 | 0.515 | 0.42  | 0.515 | -    | -           | -     | -     | -     |
| Major item approach (allowing for partial credit) NA=1 | Sample size in 1000 increments   | 1.01 | 0.99- 1.03 | 0.389 | -     | -     | -    | -           | -     | -     | -     |
|                                                        | Multicentre study                | 1.18 | 1.05- 1.33 | 0.006 | -     | -     | -    | -           | -     | -     | -     |
|                                                        | CTU or CRO support               | 1.44 | 1.31- 1.57 | <.001 | -     | -     | -    | -           | -     | -     | -     |
|                                                        | Industry sponsorship             | 1.20 | 1.09- 1.33 | <.001 | -     | -     | -    | -           | -     | -     | -     |
|                                                        | Year 2016                        | 1.33 | 1.22- 1.45 | <.001 | -     | -     | -    | -           | -     | -     | -     |
| Interaction term                                       | Sponsorship:Year interaction     | 0.61 | 0.52- 0.73 | <.001 | 30.01 | <.001 | -    | -           | -     | -     | -     |
|                                                        | CTU/CRO support:Year interaction | 0.98 | 0.82- 1.16 | 0.790 | 0.07  | 0.790 | -    | -           | -     | -     | -     |
| All item approach NA=0                                 | Sample size in 1000 increments   | 1.02 | 1.00- 1.04 | 0.095 | -     | -     | 1.02 | 1.00 – 1.04 | 0.027 | -     | -     |
|                                                        | Multicentre study                | 1.27 | 1.14- 1.43 | <.001 | -     | -     | 1.37 | 1.24 – 1.52 | <.001 | -     | -     |
|                                                        | CTU or CRO support               | 1.39 | 1.28- 1.52 | <.001 | -     | -     | 1.33 | 1.23 – 1.44 | <.001 | -     | -     |
|                                                        | Industry sponsorship             | 1.14 | 1.03- 1.25 | 0.010 | -     | -     | 1.15 | 1.05 – 1.25 | 0.001 | -     | -     |
|                                                        | Year 2016                        | 1.25 | 1.15- 1.36 | <.001 | -     | -     | 1.20 | 1.11 – 1.29 | <.001 | -     | -     |
| Interaction term                                       | Sponsorship:Year interaction     | 0.63 | 0.53- 0.74 | <.001 | 29.29 | <.001 | 0.69 | 0.59 – 0.80 | <.001 | 24.20 | <.001 |

|                           |                                  |      |            |       |       |       |      |            |       |       |       |
|---------------------------|----------------------------------|------|------------|-------|-------|-------|------|------------|-------|-------|-------|
|                           | CTU/CRO support:Year interaction | 1.02 | 0.86- 1.21 | 0.841 | 0.04  | 0.842 | 0.97 | 0.83 – 1.1 | 0.643 | 0.22  | 0.643 |
|                           |                                  |      |            |       |       |       |      | 2          |       |       |       |
| All item approach<br>NA=1 | Sample size in 1000 increments   | 1.02 | 1.00- 1.04 | 0.131 | -     | -     | 1.02 | 1.00 – 1.0 | 0.118 | -     | -     |
|                           | Multicentre study                | 1.18 | 1.06- 1.31 | 0.003 | -     | -     | 1.20 | 1.07 – 1.3 | 0.002 | -     | -     |
|                           | CTU or CRO support               | 1.36 | 1.26- 1.48 | <.001 | -     | -     | 1.39 | 1.27 – 1.5 | <.001 | -     | -     |
|                           | Industry sponsorship             | 1.13 | 1.03- 1.23 | 0.010 | -     | -     | 1.14 | 1.04 – 1.2 | 0.006 | -     | -     |
|                           | Year 2016                        | 1.23 | 1.14- 1.34 | <.001 | -     | -     | 1.23 | 1.14 – 1.3 | <.001 | -     | -     |
| Interaction term          | Sponsorship:Year interaction     | 0.64 | 0.55- 0.75 | <.001 | 31.18 | <.001 | 0.63 | 0.54 – 0.7 | <.001 | 30.67 | <.001 |
|                           | CTU/CRO support:Year interaction | 1.05 | 0.90- 1.23 | 0.564 | 0.33  | 0.564 | 1.05 | 0.89 – 1.2 | 0.594 | 0.28  | 0.594 |
|                           |                                  |      |            |       |       |       |      | 4          |       |       |       |

Abbreviations: CI, confidence interval

**Supplementary Table 8: Results from multivariable Beta regression, subset of Investigator-sponsored protocols**

| Approach                                                     | Independent Variable | Beta Regression |            |         | Likelihood ratio |       |
|--------------------------------------------------------------|----------------------|-----------------|------------|---------|------------------|-------|
|                                                              |                      | Odds Ratio      | CI         | p value | Chisq            | p     |
| Major item approach<br>(allowing for partial credit)<br>NA=0 | Sample size/1000     | 1.01            | 0.95- 1.07 | 0.803   | -                | -     |
|                                                              | Multicentre          | 1.21            | 1.05- 1.40 | 0.008   | -                | -     |
|                                                              | CTU or CRO support   | 1.55            | 1.35- 1.77 | <.001   | -                | -     |
|                                                              | Year                 | 1.61            | 1.42- 1.84 | <.001   | -                | -     |
|                                                              | Swiss cohort         | 1.48            | 1.27- 1.74 | <.001   | -                | -     |
| Interaction term                                             | CTU/CRO support:Year | 1.02            | 0.79- 1.33 | 0.869   | 0.03             | 0.869 |
|                                                              | Swiss trials:Year    | 1.39            | 1.03- 1.88 | 0.034   | 4.42             | 0.036 |
| Major item approach<br>(allowing for partial credit)<br>NA=1 | Sample size/1000     | 1.00            | 0.95- 1.06 | 0.891   | -                | -     |
|                                                              | Multicentre          | 1.19            | 1.03- 1.37 | 0.016   | -                | -     |
|                                                              | CTU or CRO support   | 1.53            | 1.34- 1.75 | <.001   | -                | -     |
|                                                              | Year                 | 1.60            | 1.41- 1.82 | <.001   | -                | -     |
|                                                              | Swiss cohort         | 1.46            | 1.25- 1.70 | <.001   | -                | -     |
| Interaction term                                             | CTU/CRO support:Year | 1.08            | 0.83- 1.39 | 0.568   | 0.33             | 0.568 |
|                                                              | Swiss trials:Year    | 1.39            | 1.03- 1.87 | 0.031   | 4.57             | 0.032 |

Abbreviations: CI, confidence interval

## STROBE Statement—Checklist of items that should be included in reports of *cross-sectional studies*

### The methods used to conduct the present study have previously been published:

Gryaznov D, Odutayo A, von Niederhäusern B, Speich B, Kasenda B, Ojeda-Ruiz E, et al. Rationale and design of repeated cross-sectional studies to evaluate the reporting quality of trial protocols: the Adherence to SPIrit REcommendations (ASPIRE) study and associated projects. *Trials*. 2020;21(1):896.  
 Link: <https://trialsjournal.biomedcentral.com/articles/10.1186/s13063-020-04808-y>

|                              | Item No | Recommendation                                                                                                                                                                                                           | Page No |
|------------------------------|---------|--------------------------------------------------------------------------------------------------------------------------------------------------------------------------------------------------------------------------|---------|
| <b>Title and abstract</b>    | 1       | (a) Indicate the study's design with a commonly used term in the title or the abstract (Section: Abstract, Design section)                                                                                               | 4       |
|                              |         | (b) Provide in the abstract an informative and balanced summary of what was done and what was found (Section: Abstract, Results section)                                                                                 | 5       |
| <b>Introduction</b>          |         |                                                                                                                                                                                                                          |         |
| Background/rationale         | 2       | Explain the scientific background and rationale for the investigation being reported (Section: Introduction, all paragraphs)                                                                                             | 6       |
| Objectives                   | 3       | State specific objectives, including any prespecified hypotheses (Section: Introduction, last paragraph)                                                                                                                 | 6       |
| <b>Methods</b>               |         |                                                                                                                                                                                                                          |         |
| Study design                 | 4       | Present key elements of study design early in the paper (Section: Methods 1 <sup>st</sup> paragraph (Published))                                                                                                         | 7       |
| Setting                      | 5       | Describe the setting, locations, and relevant dates, including periods of recruitment, exposure, follow-up, and data collection (Section: Methods, Identification of included trial protocols; Supplementary Figure 1)   | 7       |
| Participants                 | 6       | (a) Give the eligibility criteria, and the sources and methods of selection of participants (Section: Methods, Identification of included trial protocols)                                                               | 7       |
| Variables                    | 7       | Clearly define all outcomes, exposures, predictors, potential confounders, and effect modifiers. Give diagnostic criteria, if applicable (Section: Methods, Data Analysis, paragraphs 1 and 2)                           | 8       |
| Data sources/<br>measurement | 8*      | For each variable of interest, give sources of data and details of methods of assessment (measurement). Describe comparability of assessment methods if there is more than one group (Section: Methods, Data extraction) | 7       |
| Bias                         | 9       | Describe any efforts to address potential sources of bias (Section: Methods, Data extraction)                                                                                                                            | 7       |
| Study size                   | 10      | Explain how the study size was arrived at (Section: Methods 1 <sup>st</sup> paragraph (Published))                                                                                                                       | 7       |
| Quantitative variables       | 11      | Explain how quantitative variables were handled in the analyses. If applicable, describe which groupings were chosen and why (Section: Methods, Data Analysis, paragraph 1)                                              | 8       |
| Statistical methods          | 12      | (a) Describe all statistical methods, including those used to control for confounding (Section: Methods, Data Analysis, paragraph 2)                                                                                     | 8       |
|                              |         | (b) Describe any methods used to examine subgroups and interactions (Section: Methods, Data Analysis, paragraph 1)                                                                                                       | 8       |

1  
2  
3  
4  
5  
6  
7  
8  
9  
10  
11  
12  
13  
14  
15  
16  
17  
18  
19  
20  
21  
22  
23  
24  
25  
26  
27  
28  
29  
30  
31  
32  
33  
34  
35  
36  
37  
38  
39  
40  
41  
42  
43  
44  
45  
46  
47  
48  
49  
50  
51  
52  
53  
54  
55  
56  
57  
58  
59  
60

|                          |     |                                                                                                                                                                                                                                                                                                                                                                                                                                                                                                                                                                    |            |
|--------------------------|-----|--------------------------------------------------------------------------------------------------------------------------------------------------------------------------------------------------------------------------------------------------------------------------------------------------------------------------------------------------------------------------------------------------------------------------------------------------------------------------------------------------------------------------------------------------------------------|------------|
|                          |     | (c) Explain how missing data were addressed (na)                                                                                                                                                                                                                                                                                                                                                                                                                                                                                                                   |            |
|                          |     | (d) If applicable, describe analytical methods taking account of sampling strategy (na)                                                                                                                                                                                                                                                                                                                                                                                                                                                                            |            |
|                          |     | (e) Describe any sensitivity analyses (Section: Methods, Data Analysis, paragraph 1)                                                                                                                                                                                                                                                                                                                                                                                                                                                                               | 8          |
| <b>Results</b>           |     |                                                                                                                                                                                                                                                                                                                                                                                                                                                                                                                                                                    |            |
| Participants             | 13* | (a) Report numbers of individuals at each stage of study—eg numbers potentially eligible, examined for eligibility, confirmed eligible, included in the study, completing follow-up, and analysed (Supplementary Figure 1)<br>(b) Give reasons for non-participation at each stage (na)<br>(c) Consider use of a flow diagram (Supplementary Figure 1)                                                                                                                                                                                                             |            |
| Descriptive data         | 14* | (a) Give characteristics of study participants (eg demographic, clinical, social) and information on exposures and potential confounders (Section: Results, Characteristics of included trial protocols, paragraph 1 and 2. Table 1)<br>(b) Indicate number of participants with missing data for each variable of interest (na)                                                                                                                                                                                                                                   | 9          |
| Outcome data             | 15* | Report numbers of outcome events or summary measures (Section: Results, Adherence to SPIRIT in protocols from 2012 and 2016. Table 2, Figure 1)                                                                                                                                                                                                                                                                                                                                                                                                                    | 9,10       |
| Main results             | 16  | (a) Give unadjusted estimates and, if applicable, confounder-adjusted estimates and their precision (eg, 95% confidence interval). Make clear which confounders were adjusted for and why they were included (Section: Results, Multivariable regression analysis. Figure 2, Supplementary Table 7)<br>(b) Report category boundaries when continuous variables were categorized (Section: Methods, Data Analysis, paragraph 2. Figure 2)<br>(c) If relevant, consider translating estimates of relative risk into absolute risk for a meaningful time period (na) | 10,11<br>8 |
| Other analyses           | 17  | Report other analyses done—eg analyses of subgroups and interactions, and sensitivity analyses (Section: Results, Multivariable regression analysis. Supplementary Table 7)                                                                                                                                                                                                                                                                                                                                                                                        | 10,11      |
| <b>Discussion</b>        |     |                                                                                                                                                                                                                                                                                                                                                                                                                                                                                                                                                                    |            |
| Key results              | 18  | Summarise key results with reference to study objectives (Section: Discussion, Main findings and interpretation)                                                                                                                                                                                                                                                                                                                                                                                                                                                   | 11,12      |
| Limitations              | 19  | Discuss limitations of the study, taking into account sources of potential bias or imprecision. Discuss both direction and magnitude of any potential bias (Section: Discussion, Strengths and limitations, all paragraphs)                                                                                                                                                                                                                                                                                                                                        | 12,<br>13  |
| Interpretation           | 20  | Give a cautious overall interpretation of results considering objectives, limitations, multiplicity of analyses, results from similar studies, and other relevant evidence (Section: Discussion, Comparison with other studies, Implications, all paragraphs)                                                                                                                                                                                                                                                                                                      | 13,<br>14  |
| Generalisability         | 21  | Discuss the generalisability (external validity) of the study results (Section: Discussion, Strengths and limitations, paragraphs 1 and 2)                                                                                                                                                                                                                                                                                                                                                                                                                         | 12,<br>13  |
| <b>Other information</b> |     |                                                                                                                                                                                                                                                                                                                                                                                                                                                                                                                                                                    |            |

|         |    |                                                                                                                                                                                                |    |
|---------|----|------------------------------------------------------------------------------------------------------------------------------------------------------------------------------------------------|----|
| Funding | 22 | Give the source of funding and the role of the funders for the present study and, if applicable, for the original study on which the present article is based (Section: Declarations, Funding) | 16 |
|---------|----|------------------------------------------------------------------------------------------------------------------------------------------------------------------------------------------------|----|

\*Give information separately for exposed and unexposed groups.

**Note:** An Explanation and Elaboration article discusses each checklist item and gives methodological background and published examples of transparent reporting. The STROBE checklist is best used in conjunction with this article (freely available on the Web sites of PLoS Medicine at <http://www.plosmedicine.org/>, Annals of Internal Medicine at <http://www.annals.org/>, and Epidemiology at <http://www.epidem.com/>). Information on the STROBE Initiative is available at [www.strobe-statement.org](http://www.strobe-statement.org).

For peer review only



# BMJ Open

## Reporting quality of clinical trial protocols: a repeated cross sectional study about the Adherence to SPIrit Recommendations in Switzerland, Canada, and Germany (ASPIRE-SCAGE)

|                               |                                                                                                                                                                                                                                                                                                                                                                                                                                                                                                                                                                                                                                                                                                                                                                                                                                                                                                                                                                                                                                                                                                                                                                                                                                                                                                                                                                                                                                                                                                                                                                                                                                                                                                                                                                                                                                                                                                                                                                                                                                                                                                                                                                                                                                                                                                                                                                                                         |
|-------------------------------|---------------------------------------------------------------------------------------------------------------------------------------------------------------------------------------------------------------------------------------------------------------------------------------------------------------------------------------------------------------------------------------------------------------------------------------------------------------------------------------------------------------------------------------------------------------------------------------------------------------------------------------------------------------------------------------------------------------------------------------------------------------------------------------------------------------------------------------------------------------------------------------------------------------------------------------------------------------------------------------------------------------------------------------------------------------------------------------------------------------------------------------------------------------------------------------------------------------------------------------------------------------------------------------------------------------------------------------------------------------------------------------------------------------------------------------------------------------------------------------------------------------------------------------------------------------------------------------------------------------------------------------------------------------------------------------------------------------------------------------------------------------------------------------------------------------------------------------------------------------------------------------------------------------------------------------------------------------------------------------------------------------------------------------------------------------------------------------------------------------------------------------------------------------------------------------------------------------------------------------------------------------------------------------------------------------------------------------------------------------------------------------------------------|
| Journal:                      | <i>BMJ Open</i>                                                                                                                                                                                                                                                                                                                                                                                                                                                                                                                                                                                                                                                                                                                                                                                                                                                                                                                                                                                                                                                                                                                                                                                                                                                                                                                                                                                                                                                                                                                                                                                                                                                                                                                                                                                                                                                                                                                                                                                                                                                                                                                                                                                                                                                                                                                                                                                         |
| Manuscript ID                 | bmjopen-2021-053417.R1                                                                                                                                                                                                                                                                                                                                                                                                                                                                                                                                                                                                                                                                                                                                                                                                                                                                                                                                                                                                                                                                                                                                                                                                                                                                                                                                                                                                                                                                                                                                                                                                                                                                                                                                                                                                                                                                                                                                                                                                                                                                                                                                                                                                                                                                                                                                                                                  |
| Article Type:                 | Original research                                                                                                                                                                                                                                                                                                                                                                                                                                                                                                                                                                                                                                                                                                                                                                                                                                                                                                                                                                                                                                                                                                                                                                                                                                                                                                                                                                                                                                                                                                                                                                                                                                                                                                                                                                                                                                                                                                                                                                                                                                                                                                                                                                                                                                                                                                                                                                                       |
| Date Submitted by the Author: | 15-Feb-2022                                                                                                                                                                                                                                                                                                                                                                                                                                                                                                                                                                                                                                                                                                                                                                                                                                                                                                                                                                                                                                                                                                                                                                                                                                                                                                                                                                                                                                                                                                                                                                                                                                                                                                                                                                                                                                                                                                                                                                                                                                                                                                                                                                                                                                                                                                                                                                                             |
| Complete List of Authors:     | <p>Gryaznov, Dmitry; University Hospital Basel, Basel Institute for Clinical Epidemiology and Biostatistics ; University of Basel, von Niederhäusern, Belinda ; University Hospital Basel and University of Basel, Department of Clinical Research; Roche Pharma AG</p> <p>Speich, Benjamin; University of Oxford Nuffield Department of Orthopaedics Rheumatology and Musculoskeletal Sciences; University Hospital Basel, Basel Institute for Clinical Epidemiology and Biostatistics</p> <p>Kasenda, Benjamin; University Hospital Basel, Department of Medical Oncology; University Hospital Basel, Basel Institute for Clinical Epidemiology and Biostatistics</p> <p>Ojeda-Ruiz, Elena; University Hospital Basel and University of Basel, Department of Clinical Research, Basel Institute for Clinical Epidemiology and Biostatistics; Osakidetza Basque Health Service, Araba University Hospital, Preventive Medicine Department, Bioaraba Health Research Institute</p> <p>Blümle, Anette ; University of Freiburg, Institute for Evidence in Medicine; Cochrane Germany</p> <p>Schandelmaier, Stefan; University Hospital Basel and University of Basel, Department of Clinical Research, Basel Institute for Clinical Epidemiology and Biostatistics; McMaster University, Department of Health Research Methods, Evidence, and Impact</p> <p>Mertz, Dominik; McMaster University, Department of Health Research Methods, Evidence, and Impact</p> <p>Odutayo, Ayodele; University of Oxford, Nuffield Department of Orthopaedics, Rheumatology and Musculoskeletal Sciences</p> <p>Tomonaga, Yuki; Epidemiology, Biostatistic und Prevention Institute, University of Zurich, Zurich, Switzerland</p> <p>Amstutz, Alain; Schweizerisches Tropen- und Public Health-Institut, Clinical Research Unit; Universitätsspital Basel, Division of Infectious Diseases and Hospital Epidemiology</p> <p>Pauli-Magnus, Christiane ; University Hospital Basel and University of Basel, Department of Clinical Research</p> <p>Gloy, Viktoria; University Hospital Basel, Department of Clinical Research, Basel Institute for Clinical Epidemiology and Biostatistics, University Hospital Basel</p> <p>Lohner, Szimonetta ; Cochrane Hungary, Clinical Centre of the University of Pécs, Medical School, University of Pécs</p> <p>Bischoff, Karin ; University of Freiburg; Cochrane Germany</p> |

|                                 |                                                                                                                                                                                                                                                                                                                                                                                                                                                                                                                                                                                                                                                                                                                                                                                                                                                                                                                                                                                                                                                                                                                                                                                                                                                                                                                                                                                                                                                                                                                                                                                                                                                                                                                                                                                                                                                                                                                                                                                                                                                                                                                                                                                                                                                                                                                                                                                                                                                                                                                                                                                                                                                                                                                                                                                                                                                                                                                                                                                                                                                      |
|---------------------------------|------------------------------------------------------------------------------------------------------------------------------------------------------------------------------------------------------------------------------------------------------------------------------------------------------------------------------------------------------------------------------------------------------------------------------------------------------------------------------------------------------------------------------------------------------------------------------------------------------------------------------------------------------------------------------------------------------------------------------------------------------------------------------------------------------------------------------------------------------------------------------------------------------------------------------------------------------------------------------------------------------------------------------------------------------------------------------------------------------------------------------------------------------------------------------------------------------------------------------------------------------------------------------------------------------------------------------------------------------------------------------------------------------------------------------------------------------------------------------------------------------------------------------------------------------------------------------------------------------------------------------------------------------------------------------------------------------------------------------------------------------------------------------------------------------------------------------------------------------------------------------------------------------------------------------------------------------------------------------------------------------------------------------------------------------------------------------------------------------------------------------------------------------------------------------------------------------------------------------------------------------------------------------------------------------------------------------------------------------------------------------------------------------------------------------------------------------------------------------------------------------------------------------------------------------------------------------------------------------------------------------------------------------------------------------------------------------------------------------------------------------------------------------------------------------------------------------------------------------------------------------------------------------------------------------------------------------------------------------------------------------------------------------------------------------|
|                                 | <p>Wollmann, Katharina ; Institute for Evidence in Medicine, Medical Center – University of Freiburg, Faculty of Medicine, University of Freiburg; Cochrane Germany, Cochrane Germany Foundation</p> <p>Rehner, Laura ; University of Freiburg; University Medicine Greifswald, Department of Epidemiology and Community Health, Institute for Community Medicine</p> <p>Meerpohl, Joerg; Medical Center-University of Freiburg, Institute for Evidence in Medicine (for Cochrane Germany Foundation); Cochrane Germany Foundation</p> <p>Nordmann, Alain; University of Basel, Department of Clinical Research, Basel Institute for Clinical Epidemiology and Biostatistics, University Hospital Basel</p> <p>Klatte, Katharina ; Department of Clinical Research, Clinical Trial Unit, University Hospital Basel and University of Basel</p> <p>Ghosh, Nilabh ; University of Basel, Department of Neurosurgery</p> <p>Taji Heravi, Ala ; Department of Clinical Research, Basel Institute for Clinical Epidemiology and Biostatistics, University Hospital Basel and University of Basel</p> <p>Wong, Jaqueline ; Department of Health Research Methods, Evidence, and Impact, McMaster University</p> <p>Chow, Ngai ; McMaster University, Department of Health Research Methods, Evidence, and Impact; Canadian Memorial Chiropractic College, Centre for Disability Prevention and Rehabilitation</p> <p>Hong, Patrick; University of Ottawa Faculty of Medicine</p> <p>McCord, Kimberly; Basel Institute for Clinical Epidemiology and Biostatistics, Department of Clinical Research, University Hospital Basel, University of Basel</p> <p>Sricharoenchai, Sirintip; University Hospital Basel, Department of Clinical Research, Basel Institute for Clinical Epidemiology and Biostatistics, University Hospital Basel</p> <p>Busse, Jason; McMaster University, Anesthesia; McMaster University, Clinical Epidemiology &amp; Biostatistics</p> <p>Agarwal, Arnav; McMaster University, Department of Health Research Methods, Evidence, and Impact</p> <p>Saccilotto, Ramon; Department of Clinical Research, Basel Institute for Clinical Epidemiology and Biostatistics, University Hospital Basel and University of Basel</p> <p>Schwenkglenks, Matthias; University of Basel, Institute of Pharmaceutical Medicine (ECPM); University of Zurich, Epidemiology, Biostatistics and Prevention Institute (EBPI)</p> <p>Moffa, Giusi ; University of Basel, Basel Institute for Clinical Epidemiology and Biostatistics, Department of Clinical Research; University of Basel, Department of Mathematics and Computer Science</p> <p>Hemkens, Lars; University Hospital Basel, Basel Institute for Clinical Epidemiology and Biostatistics</p> <p>Hopewell, Sally; University of Oxford, Nuffield Department of Orthopaedics, Rheumatology and Musculoskeletal Sciences</p> <p>Von Elm , Erik; University of Lausanne,</p> <p>Briel, Matthias; University Hospital Basel, Basel Institute for Clinical Epidemiology and Biostatistics</p> |
| <b>Primary Subject Heading</b>: | Epidemiology                                                                                                                                                                                                                                                                                                                                                                                                                                                                                                                                                                                                                                                                                                                                                                                                                                                                                                                                                                                                                                                                                                                                                                                                                                                                                                                                                                                                                                                                                                                                                                                                                                                                                                                                                                                                                                                                                                                                                                                                                                                                                                                                                                                                                                                                                                                                                                                                                                                                                                                                                                                                                                                                                                                                                                                                                                                                                                                                                                                                                                         |
| Secondary Subject Heading:      | Epidemiology, Research methods                                                                                                                                                                                                                                                                                                                                                                                                                                                                                                                                                                                                                                                                                                                                                                                                                                                                                                                                                                                                                                                                                                                                                                                                                                                                                                                                                                                                                                                                                                                                                                                                                                                                                                                                                                                                                                                                                                                                                                                                                                                                                                                                                                                                                                                                                                                                                                                                                                                                                                                                                                                                                                                                                                                                                                                                                                                                                                                                                                                                                       |
| Keywords:                       | EPIDEMIOLOGY, Clinical trials < THERAPEUTICS, Protocols & guidelines < HEALTH SERVICES ADMINISTRATION & MANAGEMENT                                                                                                                                                                                                                                                                                                                                                                                                                                                                                                                                                                                                                                                                                                                                                                                                                                                                                                                                                                                                                                                                                                                                                                                                                                                                                                                                                                                                                                                                                                                                                                                                                                                                                                                                                                                                                                                                                                                                                                                                                                                                                                                                                                                                                                                                                                                                                                                                                                                                                                                                                                                                                                                                                                                                                                                                                                                                                                                                   |
|                                 |                                                                                                                                                                                                                                                                                                                                                                                                                                                                                                                                                                                                                                                                                                                                                                                                                                                                                                                                                                                                                                                                                                                                                                                                                                                                                                                                                                                                                                                                                                                                                                                                                                                                                                                                                                                                                                                                                                                                                                                                                                                                                                                                                                                                                                                                                                                                                                                                                                                                                                                                                                                                                                                                                                                                                                                                                                                                                                                                                                                                                                                      |

SCHOLARONE™  
Manuscripts

1  
2  
3  
4  
5  
6  
7  
8  
9  
10  
11  
12  
13  
14  
15  
16  
17  
18  
19  
20  
21  
22  
23  
24  
25  
26  
27  
28  
29  
30  
31  
32  
33  
34  
35  
36  
37  
38  
39  
40  
41  
42  
43  
44  
45  
46  
47  
48  
49  
50  
51  
52  
53  
54  
55  
56  
57  
58  
59  
60



I, the Submitting Author has the right to grant and does grant on behalf of all authors of the Work (as defined in the below author licence), an exclusive licence and/or a non-exclusive licence for contributions from authors who are: i) UK Crown employees; ii) where BMJ has agreed a CC-BY licence shall apply, and/or iii) in accordance with the terms applicable for US Federal Government officers or employees acting as part of their official duties; on a worldwide, perpetual, irrevocable, royalty-free basis to BMJ Publishing Group Ltd ("BMJ") its licensees and where the relevant Journal is co-owned by BMJ to the co-owners of the Journal, to publish the Work in this journal and any other BMJ products and to exploit all rights, as set out in our [licence](#).

The Submitting Author accepts and understands that any supply made under these terms is made by BMJ to the Submitting Author unless you are acting as an employee on behalf of your employer or a postgraduate student of an affiliated institution which is paying any applicable article publishing charge ("APC") for Open Access articles. Where the Submitting Author wishes to make the Work available on an Open Access basis (and intends to pay the relevant APC), the terms of reuse of such Open Access shall be governed by a Creative Commons licence – details of these licences and which [Creative Commons](#) licence will apply to this Work are set out in our licence referred to above.

Other than as permitted in any relevant BMJ Author's Self Archiving Policies, I confirm this Work has not been accepted for publication elsewhere, is not being considered for publication elsewhere and does not duplicate material already published. I confirm all authors consent to publication of this Work and authorise the granting of this licence.

# Reporting quality of clinical trial protocols: a repeated cross sectional study about the Adherence to SPIrit Recommendations in Switzerland, CANada, and GERmany (ASPIRE-SCAGE)

Version 6.0 January 15 , 2021

Dmitry Gryaznov<sup>1</sup> MD, MSc; Belinda von Niederhäusern<sup>4,15</sup> PhD; Benjamin Speich<sup>1,3</sup> PhD; Benjamin Kasenda<sup>1,5,6</sup> MD, PhD; Elena Ojeda-Ruiz<sup>1,7</sup> MD; Anette Blümle<sup>8,9</sup> PhD; Stefan Schandelmaier<sup>1,10</sup> MD, PhD; Dominik Mertz<sup>10</sup> MD; Ayodele Odutayo<sup>2,3</sup> MD, PhD; Yuki Tomonaga<sup>11</sup> PhD; Alain Amstutz<sup>1,13,14</sup> MD; Christiane Pauli-Magnus<sup>4</sup> MD, Viktoria Gloy<sup>1</sup> PhD; Szimonetta Lohner<sup>21</sup> MD, PhD; Karin Bischoff<sup>8,9</sup> MSc; Katharina Wollmann<sup>8,9</sup> MSc; Laura Rehner<sup>8,19</sup> MSc; Joerg J Meerpohl<sup>8,9</sup> MD; Alain Nordmann<sup>1</sup> MD, MSc; Katharina Klatte<sup>4</sup> MSc; Nilabh Ghosh<sup>22</sup> MSc; Ala Taji Heravi<sup>1,13</sup> MSc; Jacqueline Wong<sup>10</sup> PhD; Ngai Chow<sup>10</sup> PhD; Patrick Jiho Hong<sup>10,20</sup> PhD; Kimberly McCord<sup>1</sup> PhD; Sirintip Sricharoenchai<sup>1</sup> MD, MSc; Jason W. Busse<sup>10,18</sup> PhD; Arnav Agarwal<sup>10</sup> MD; Ramon Saccilotto<sup>1</sup> MD, MSc; Matthias Schwenkglens<sup>11,12</sup> PhD; Giusi Moffa<sup>1,16</sup> PhD; Lars G. Hemkens<sup>1</sup> MD; Sally Hopewell<sup>3</sup> PhD; Erik von Elm<sup>17</sup> MD, MSc; Matthias Briel<sup>1,10</sup> MD, PhD.

\* Corresponding author

<sup>1</sup> Department of Clinical Research, Basel Institute for Clinical Epidemiology and Biostatistics, University Hospital Basel and University of Basel, Basel, Switzerland

(Emails: DG, [dmitry.gryaznov@usb.ch](mailto:dmitry.gryaznov@usb.ch); BS, [benjamin.speich@ndorms.ox.ac.uk](mailto:benjamin.speich@ndorms.ox.ac.uk); BK, [benjamin.kasenda@usb.ch](mailto:benjamin.kasenda@usb.ch); StS, [stefan.schandelmaier@usb.ch](mailto:stefan.schandelmaier@usb.ch); AA, [alain.amstutz@unibas.ch](mailto:alain.amstutz@unibas.ch); VG, [viktoria.gloy@usb.ch](mailto:viktoria.gloy@usb.ch); AN, [alain.nordmann@usb.ch](mailto:alain.nordmann@usb.ch); NG, [nilabh.ghosh@unibas.ch](mailto:nilabh.ghosh@unibas.ch); ATH, [ala.tajiheravi@usb.ch](mailto:ala.tajiheravi@usb.ch); KMC, [kima.mccord@gmail.com](mailto:kima.mccord@gmail.com); SS, [sirintipsri@gmail.com](mailto:sirintipsri@gmail.com); GM, [giusi.moffa@unibas.ch](mailto:giusi.moffa@unibas.ch); RS, [ramon.saccilotto@usb.ch](mailto:ramon.saccilotto@usb.ch); LGH, [lars.hemkens@usb.ch](mailto:lars.hemkens@usb.ch); MB, [matthias.briel@usb.ch](mailto:matthias.briel@usb.ch))

<sup>2</sup> Applied Health Research Centre, Li Ka Shing Knowledge Institute of St Michael's Hospital, Toronto, Canada (Emails: AO, [ayodele.odutayo@mail.utoronto.ca](mailto:ayodele.odutayo@mail.utoronto.ca))

<sup>3</sup> Oxford Clinical Trials Research Unit and Centre for Statistics in Medicine, Nuffield Department of Orthopaedics, Rheumatology and Musculoskeletal Sciences, University of Oxford, Oxford, United Kingdom (Emails: AO, [ayodele.odutayo@mail.utoronto.ca](mailto:ayodele.odutayo@mail.utoronto.ca); BS, [benjamin.speich@ndorms.ox.ac.uk](mailto:benjamin.speich@ndorms.ox.ac.uk); SH, [sally.hopewell@csm.ox.ac.uk](mailto:sally.hopewell@csm.ox.ac.uk))

<sup>4</sup> Department of Clinical Research, Clinical Trial Unit, University Hospital Basel and University of Basel, Basel, Switzerland (Emails: BvN, [bvniederhaeusern@gmail.com](mailto:bvniederhaeusern@gmail.com); CPM, [christiane.pauli-magnus@usb.ch](mailto:christiane.pauli-magnus@usb.ch); KK, [katharina.klatte@usb.ch](mailto:katharina.klatte@usb.ch))

<sup>5</sup> Department of Medical Oncology, University Hospital Basel, Basel, Switzerland (Email: BK, [Benjamin.kasenda@usb.ch](mailto:Benjamin.kasenda@usb.ch))

<sup>6</sup> iOMEDICO AG, Research & Development, Freiburg, Germany (Email: BK, [Benjamin.kasenda@usb.ch](mailto:Benjamin.kasenda@usb.ch))

<sup>7</sup> Bioaraba Health Research Institute, Health Prevention, Promotion and Care Area; Osakidetza Basque Health Service, Araba University Hospital, Preventive Medicine Department, Vitoria-Gasteiz, Spain (Email: EOR, [e.ojedaerre@gmail.com](mailto:e.ojedaerre@gmail.com))

<sup>8</sup> Institute for Evidence in Medicine, Medical Center – University of Freiburg, Faculty of Medicine, University of Freiburg, Freiburg, Germany (Emails: AM, [bluemle@ifem.uni-freiburg.de](mailto:bluemle@ifem.uni-freiburg.de); KB, [bischoff@ifem.uni-freiburg.de](mailto:bischoff@ifem.uni-freiburg.de); KW, [wollmann@cochrane.de](mailto:wollmann@cochrane.de); LR, [laura.rehner@uni-greifswald.de](mailto:laura.rehner@uni-greifswald.de); JJM, [meerpohl@ifem.uni-freiburg.de](mailto:meerpohl@ifem.uni-freiburg.de))

<sup>9</sup> Cochrane Germany, Cochrane Germany Foundation, Freiburg, Germany (Emails: AM, [blueMLE@ifem.uni-freiburg.de](mailto:blueMLE@ifem.uni-freiburg.de) ; KB, [bischoff@ifem.uni-freiburg.de](mailto:bischoff@ifem.uni-freiburg.de) ; KW [wollmann@cochrane.de](mailto:wollmann@cochrane.de) ; SIL, [lohner.szimonetta@pte.hu](mailto:lohner.szimonetta@pte.hu) ; JJM, [meerpohl@cochrane.de](mailto:meerpohl@cochrane.de))

<sup>10</sup> Department of Health Research Methods, Evidence, and Impact, McMaster University, Hamilton, Canada (Emails: StS, [Stefan.schandelmaier@usb.ch](mailto:Stefan.schandelmaier@usb.ch); DM, [mertzd@mcmaster.ca](mailto:mertzd@mcmaster.ca); JW, [wongj37@mcmaster.ca](mailto:wongj37@mcmaster.ca); NC, [nchow@cmcc.ca](mailto:nchow@cmcc.ca); PJHH, [jhong030@uottawa.ca](mailto:jhong030@uottawa.ca); JB, [bussejw@mcmaster.ca](mailto:bussejw@mcmaster.ca); ArA, [arnav.agarwal@mail.utoronto.ca](mailto:arnav.agarwal@mail.utoronto.ca); MB, [Matthias.briel@usb.ch](mailto:Matthias.briel@usb.ch) )

<sup>11</sup> Epidemiology, Biostatistics and Prevention Institute, University of Zurich, Zurich, Switzerland (Emails: YT, [yuki.tomonaga@uzh.ch](mailto:yuki.tomonaga@uzh.ch) ; MS, [matthias.schwenkglens@uzh.ch](mailto:matthias.schwenkglens@uzh.ch))

<sup>12</sup> Institute of Pharmaceutical Medicine (ECPM), University of Basel, Basel, Switzerland (Email: MS, [m.schwenkglens@unibas.ch](mailto:m.schwenkglens@unibas.ch))

<sup>13</sup> Swiss Tropical and Public Health Institute, University of Basel, Basel, Switzerland (Email: AA, [alain.amstutz@unibas.ch](mailto:alain.amstutz@unibas.ch))

<sup>14</sup> Department of Infectious Diseases and Hospital Epidemiology, University Hospital Basel, Basel, Switzerland (Email: AA, [alain.amstutz@unibas.ch](mailto:alain.amstutz@unibas.ch))

<sup>15</sup> Roche Pharma AG, Grenzach-Wyhlen, Germany (Email: BVN, [bvniederhaeusern@gmail.com](mailto:bvniederhaeusern@gmail.com))

<sup>16</sup> Department of Mathematics and Computer Science, University of Basel, Basel, Switzerland (Email: GM, [giusi.moffa@unibas.ch](mailto:giusi.moffa@unibas.ch))

<sup>17</sup> Cochrane Switzerland, Centre for Primary Care and Public Health (Unisanté), University of Lausanne, Lausanne, Switzerland (Email: EvE, [Erik.VonElm@unisante.ch](mailto:Erik.VonElm@unisante.ch))

<sup>18</sup> Department of Anesthesia, McMaster University, Hamilton, Canada (Emails: JWB, [bussejw@mcmaster.ca](mailto:bussejw@mcmaster.ca))

<sup>19</sup> Department of Epidemiology and Community Health, Institute for Community Medicine, University Medicine Greifswald, Greifswald, Germany (Email: LR, [laura.rehner@uni-greifswald.de](mailto:laura.rehner@uni-greifswald.de))

<sup>20</sup> Department of Anesthesiology and Pain Medicine, University of Toronto, Toronto, Canada (Emails: PJHH, [jhong030@uottawa.ca](mailto:jhong030@uottawa.ca))

<sup>21</sup> Cochrane Hungary, Clinical Centre of the University of Pécs, Medical School, University of Pécs, Pécs, Hungary (Emails : SIL, [lohner.szimonetta@pte.hu](mailto:lohner.szimonetta@pte.hu))

<sup>22</sup> Department of Neurosurgery and Department of Biomedicine, University Hospital Basel, University of Basel, Basel, Switzerland (Email: [nilabh.ghosh@unibas.ch](mailto:nilabh.ghosh@unibas.ch))

#### Corresponding author:

Prof. Matthias Briel MD PhD MSc

Department of Clinical Research, Basel Institute for Clinical Epidemiology and Biostatistics,  
University Hospital Basel, Spitalstrasse 12, 4031 Basel, Switzerland

Phone: +41-(0)61 328 5092

1  
2  
3 Fax: +41-(0)61 265 3109

4  
5 Email: [matthias.briel@usb.ch](mailto:matthias.briel@usb.ch)  
6  
7  
8  
9

10 Word count abstract: 290

11  
12 Word count main text: 3284

13  
14 Number of tables: 2

15  
16 Number of figures: 2

17  
18 Number of references: 26  
19  
20  
21  
22  
23  
24  
25  
26  
27  
28  
29  
30  
31  
32  
33  
34  
35  
36  
37  
38  
39  
40  
41  
42  
43  
44  
45  
46  
47  
48  
49  
50  
51  
52  
53  
54  
55  
56  
57  
58  
59  
60

For peer review only

## ABSTRACT

### Objectives

Comprehensive protocols are key for the planning and conduct of randomized clinical trials (RCTs). Evidence of low reporting quality of RCT protocols led to the publication of the Standard Protocol Items: Recommendations for Interventional Trials (SPIRIT) checklist in 2013. We aimed to examine the quality of reporting of RCT protocols from three countries before and after the publication of the SPIRIT checklist.

### Design

Repeated cross sectional study.

### Setting

Swiss, German, and Canadian research ethics committees.

### Participants

RCT protocols approved by research ethics committees in 2012 (n=257) and 2016 (n=292).

### Primary and secondary outcome measures

The primary outcomes were the proportion of reported SPIRIT items per protocol and the proportion of trial protocols reporting individual SPIRIT items. We compared these outcomes in protocols approved in 2012 and 2016, and built regression models to explore factors associated with adherence to SPIRIT. For each protocol, we also extracted information on general trial characteristics and assessed whether individual SPIRIT items were reported

### Results

The median proportion of reported SPIRIT items among RCT protocols showed a non-significant increase from 72% (interquartile range [IQR], 63%-79%) in 2012 to 77% (IQR, 68%-82%) in 2016. However, in a pre-planned subgroup analysis, we detected a significant improvement in investigator-sponsored protocols: the median proportion increased from 64% (IQR, 55%-72%) in 2012 to 76% (IQR, 64%-83%) in 2016, while for industry-sponsored protocols median adherence was 77% (IQR 72%-80%) for both years. The following trial characteristics were independently associated with lower adherence to SPIRIT: single-centre



1  
2  
3 trial, no support from a clinical trials unit or contract research organization, and investigator-  
4  
5 sponsorship.

## 6 7 **Conclusions**

8  
9 In 2012, industry-sponsored RCT protocols were reported more comprehensively than  
10  
11 investigator-sponsored protocols. After publication of the SPIRIT checklist, investigator-  
12  
13 sponsored protocols improved to the level of industry-sponsored protocols, which did not  
14  
15 improve.  
16

## 17 18 19 20 21 **Strengths and limitations of the study:**

- 22  
23  
24 • We had full access to randomised clinical trial protocols from all research ethics  
25 committees in Switzerland and a convenience sample of one ethics committee in  
26 Germany and one in Canada approved in 2012 and 2016.
- 27  
28 • The sample of trial protocols from Switzerland (n=397) was much larger than the  
29 sample from Germany (n=75) or Canada (n=77).
- 30  
31 • The results from multivariable beta regression and logistic regression models were  
32 robust in sensitivity analyses using methods outlined *a priori* in a previously published  
33 protocol.
- 34  
35 • All analyses were observational and any causal effect of the published SPIRIT  
36 checklist cannot be inferred.
- 37  
38 • Included trial protocols came all from three high-income countries limiting the  
39 generalisability of the results.  
40  
41  
42  
43  
44  
45  
46  
47  
48  
49

50  
51 **Key words:** Randomised clinical trials, trial protocol, reporting quality, reporting guideline  
52 adherence, meta-research  
53  
54  
55  
56  
57  
58  
59  
60

1  
2  
3  
4  
5  
6  
7  
8  
9  
10  
11  
12  
13  
14  
15  
16  
17  
18  
19  
20  
21  
22  
23  
24  
25  
26  
27  
28  
29  
30  
31  
32  
33  
34  
35  
36  
37  
38  
39  
40  
41  
42  
43  
44  
45  
46  
47  
48  
49  
50  
51  
52  
53  
54  
55  
56  
57  
58  
59  
60

For peer review only

## INTRODUCTION

Randomised clinical trials (RCTs) are directed by their protocol, which documents the rationale, design, and planned reporting of a trial.<sup>1</sup> Funding agencies, research ethics committees (RECs), regulatory agencies, medical journals, systematic reviewers and other groups rely on protocols to appraise the quality of a proposed trial.<sup>2</sup> With incomplete protocols reviewers typically cannot distinguish between the use of inappropriate methodology and the non-reporting of appropriate methodology. In addition, if details about the application of the trial intervention or situations with un-blinding of trial participants are lacking, the resulting uncertainty with treating clinicians may compromise the safety of trial participants. Empirical evidence from meta-research suggested numerous limitations in the reporting of RCT protocols including insufficient descriptions of treatment allocation methods, primary outcomes, sample size calculations, data analysis, and the roles of sponsors in trial design or access to data.<sup>3-9</sup> About half of protocols approved by French RECs, for instance, were estimated to have subsequent amendments to address deficiencies,<sup>10</sup> and a third of amendments submitted to RECs for industry-sponsored trial protocols could have been avoided by preparing more comprehensive protocols.<sup>11 12</sup>

In response, a minimum set of items to be addressed in trial protocols was developed by the Standard Protocol Items: Recommendations for Interventional Trials (SPIRIT) Initiative, and published in January 2013.<sup>13 14</sup> Subsequently, a number of journals publishing trial protocols, funding agencies, and RECs endorsed the use of SPIRIT or related recommendations (e.g., [www.swissethics.ch](http://www.swissethics.ch)).<sup>15</sup> Researchers have applied the SPIRIT checklist to assess the quality of trial protocols with respect to patient reported outcomes,<sup>16</sup> statistical analyses,<sup>17</sup> and cluster-randomised trials with stepped wedge design.<sup>18</sup> However, there is no large-scale empirical study that has longitudinally evaluated the impact of the SPIRIT recommendations on the quality of reporting among RCT protocols.

The Adherence to SPIrit REcommendations (ASPIRE) study group is an international collaboration of researchers with a mandate to (i) evaluate the completeness of RCT

1  
2  
3 protocols before and after publication of the SPIRIT statement, (ii) determine trial  
4 characteristics associated with non-adherence to SPIRIT checklist items, and (iii) investigate  
5 whether the comprehensiveness of RCT protocols varies across countries.<sup>19</sup> In the present  
6 paper we report the results from our investigation of RCT protocols from Switzerland,  
7 Canada, and Germany (ASPIRE-SCAGE).  
8  
9  
10  
11  
12  
13  
14

## 15 **METHODS**

16 The methods used to conduct the present study have previously been published.<sup>19</sup>  
17  
18  
19  
20

### 21 **Identification of included trial protocols**

22  
23 We included trial protocols approved by RECs in 2012 or 2016 that assigned patients or  
24 groups of patients at random to one or more interventions to evaluate their effect on health  
25 outcomes. We excluded RCTs enrolling healthy volunteers, economic evaluations, animal  
26 studies, studies based on tissue samples, observational studies, studies involving only  
27 qualitative methods, and studies with a quasi-random method of allocation. The participating  
28 RECs in Switzerland (Basel, Bern, Geneva, Lausanne, St. Gallen, Thurgau, Ticino, Zurich),  
29 Germany (Freiburg) and Canada (Hamilton) approved this study or explicitly stated that no  
30 ethical approval was required. Details of the identification of included RCT protocols are  
31 presented in **Supplementary Figure 1**. The eligibility of RCT protocols was assessed  
32 independently and in duplicate. Any disagreements were resolved by discussion and  
33 consensus.  
34  
35  
36  
37  
38  
39  
40  
41  
42  
43  
44  
45  
46

### 47 **Data extraction**

48  
49 We used a web-based, password protected data extraction tool (<http://squake.ro.ch>) for data  
50 collection and storage.<sup>19 20</sup> Researchers trained in trial methodology completed a calibration  
51 process to improve reliability, and then extracted relevant data from RCT protocols  
52 independently and in duplicate, including whether individual SPIRIT items were reported.<sup>19</sup>  
53 Disagreements were resolved by discussion. Due to limited resources 15% of included  
54 protocols were extracted by a single researcher (having extracted at least 100 RCT protocols  
55  
56  
57  
58  
59  
60

1  
2  
3 in duplicate). All researchers extracting data from RCT protocols signed confidentiality  
4 agreements and the final database contained only coded data. Our data extraction forms are  
5 provided as **Supplementary Table 1**.  
6  
7  
8  
9

## 10 **Data Analysis**

11  
12 The outcomes of interest were the proportion of SPIRIT checklist items that were reported  
13 among our cohorts of study protocols, and the proportion of RCT protocols addressing each  
14 SPIRIT checklist item. Our primary analysis was based on a rating approach that allowed for  
15 partial credit of individually met sub-items or components of major SPIRIT items, because it  
16 keeps the hierarchical structure of the SPIRIT checklist and it independently considers all  
17 components and sub-items of all individual SPIRIT items.<sup>19</sup> Other rating approaches that  
18 consider major SPIRIT items only or equally consider items and sub-items, were used in  
19 sensitivity analyses. We provided descriptive statistics as frequencies and proportions for  
20 binary data and median (interquartile range, IQR) for continuous data.  
21  
22  
23  
24  
25  
26  
27  
28  
29  
30

31  
32 To investigate whether the reporting quality of RCT protocols (as defined by the proportion of  
33 reported SPIRIT checklist items) has increased from 2012 to 2016, we conducted  
34 multivariable beta regression analysis<sup>21</sup> with the proportion of SPIRIT items adhered to per  
35 protocol as dependent variable and the following predefined independent variables: (i)  
36 approval year (2012 *versus* 2016), (ii) investigator sponsorship *versus* industry sponsorship,  
37 (iii) planned sample size (in increments of 1000), (iv) single centre *versus* multicentre RCTs,  
38 and (v) reported methodological support from a CRO or CTU *versus* no reported support. We  
39 included interaction terms in our model to investigate potential interactions of year of  
40 approval (2012 or 2016) with either sponsorship of protocols or reported methodological  
41 support. We performed a likelihood ratio test to check if the interaction terms improved the  
42 goodness of fit of the models. To examine in a sensitivity analysis whether the  
43 comprehensiveness of RCT protocols varied across countries we stratified the median  
44 proportion of addressed SPIRIT items per protocol by country (Switzerland, Canada,  
45 Germany), by year of approval (2012 *versus* 2016), and by sponsorship (investigator *versus*  
46  
47  
48  
49  
50  
51  
52  
53  
54  
55  
56  
57  
58  
59  
60

1  
2  
3 industry), and added a country variable to the regression model. In further sensitivity  
4 analyses, we used hierarchical logistic regression (response is a binary variable indicating  
5 adherence to each SPIRIT item with clustering by protocol; i.e. independent variables were  
6 included in the model as fixed effects and the protocol as a random effect) instead of beta  
7 regression.<sup>19</sup> Beta regression allowed us to directly model the proportion of SPIRIT items  
8 adhered to per protocol<sup>21</sup>, while hierarchical logistic regression allowed us to capture the  
9 variability within protocols. For all types of regression analyses we reported coefficients or  
10 odds ratios (ORs) accompanied by 95% confidence intervals (CIs). We used the statistical  
11 software R version 3.6.1 for all data analysis. All statistical tests were performed using a  
12 significance level of  $p=0.05$ .  
13  
14  
15  
16  
17  
18  
19  
20  
21  
22  
23

### 24 **Patient and public involvement**

25 No patients were involved in the study.  
26  
27  
28  
29

## 30 **RESULTS**

### 31 **Characteristics of included trial protocols**

32 We included 549 RCT protocols in our study; 257 from 2012 and 292 from 2016 (**Table 1**).  
33 The majority of which were individually randomised, multicentre, parallel-group, superiority  
34 trials in oncology or cardiovascular medicine, and approved by a Swiss REC. Seventy-seven  
35 RCT protocols were from Canada, and 75 from Germany. About half of the protocols were  
36 investigator-sponsored and half were industry-sponsored. In 2016 there were more  
37 investigator-sponsored protocols (162/292, 55.5%) included than in 2012 (119/257, 46.3%).  
38 In 2016 the median planned sample size was lower (199; IQR, 100-490) than in 2012 (300;  
39 IQR, 100-720). Otherwise, trial characteristics were similar between cohorts. Protocols of  
40 industry-sponsored RCTs had, on average, a larger sample size, were predominantly  
41 multinational, and more frequently placebo-controlled than those of investigator-sponsored  
42 RCTs (**Table 1**).  
43  
44  
45  
46  
47  
48  
49  
50  
51  
52  
53  
54  
55  
56  
57  
58  
59  
60

**Table 1:** Characteristics of included randomised trial protocols

| Characteristics                                 | 2012             |                      |                | 2016             |                      |                | Overall        |
|-------------------------------------------------|------------------|----------------------|----------------|------------------|----------------------|----------------|----------------|
|                                                 | Sponsorship      |                      | Total (n=257)  | Sponsorship      |                      | Total (N=292)  | Total (N=549)  |
|                                                 | Industry (N=138) | Investigator (N=119) |                | Industry (N=130) | Investigator (N=162) |                |                |
| <b>Planned target sample size, median (IQR)</b> | 450 (184.5, 800) | 150 (63, 516)        | 300 (100, 720) | 306.5 (150,621)  | 141 (70, 300)        | 199 (100, 490) | 220 (100, 597) |
| <b>Planned centres</b>                          |                  |                      |                |                  |                      |                |                |
| Single centre, No. (%)                          | 2 (1.4%)         | 45 (37.8%)           | 47 (18.3%)     | 4 (3.1%)         | 73 (45.1%)           | 77 (26.4%)     | 124 (22.6%)    |
| Multicentre, national, No. (%)                  | 10 (7.2%)        | 30 (25.2%)           | 40 (15.6%)     | 6 (4.6%)         | 41 (25.3%)           | 47 (16.1%)     | 87 (15.8%)     |
| Multicentre, multinational, No. (%)             | 126 (91.3%)      | 44 (37.0%)           | 170 (66.1%)    | 120 (92.3%)      | 48 (29.6%)           | 168 (57.5%)    | 338 (61.6%)    |
| <b>Unit of randomisation</b>                    |                  |                      |                |                  |                      |                |                |
| Individuals                                     | 137 (99.3%)      | 113 (95.0%)          | 250 (97.3%)    | 127 (97.7%)      | 158 (97.5%)          | 285 (97.6%)    | 535 (97.4%)    |
| Clusters                                        | 0 (0.0%)         | 4 (3.4%)             | 4 (1.6%)       | 1 (0.8%)         | 3 (1.9%)             | 4 (1.4%)       | 8 (1.5%)       |
| Body parts                                      | 1 (0.7%)         | 2 (1.7%)             | 3 (1.2%)       | 2 (1.5%)         | 1 (0.6%)             | 3 (1.0%)       | 6 (1.1%)       |
| <b>Study design</b>                             |                  |                      |                |                  |                      |                |                |
| Parallel                                        | 135 (97.8%)      | 104 (87.4%)          | 239 (93.0%)    | 127 (97.7%)      | 147 (90.7%)          | 274 (93.8%)    | 513 (93.4%)    |
| Crossover                                       | 2 (1.4%)         | 9 (7.6%)             | 11 (4.3%)      | 2 (1.5%)         | 10 (6.2%)            | 12 (4.1%)      | 23 (4.2%)      |
| Factorial                                       | 1 (0.7%)         | 6 (5.0%)             | 7 (2.7%)       | 1 (0.8%)         | 5 (3.1%)             | 6 (2.1%)       | 13 (2.4%)      |
| <b>Study purpose</b>                            |                  |                      |                |                  |                      |                |                |
| Superiority                                     | 110 (79.7%)      | 93 (78.2%)           | 203 (79.0%)    | 107 (82.3%)      | 132 (81.5%)          | 239 (81.8%)    | 442 (80.5%)    |
| Non-inferiority                                 | 23 (16.7%)       | 19 (16.0%)           | 42 (16.3%)     | 20 (15.4%)       | 24 (14.8%)           | 44 (15.1%)     | 86 (15.7%)     |
| Unclear                                         | 5 (3.6%)         | 7 (5.9%)             | 12 (4.7%)      | 3 (2.3%)         | 6 (3.7%)             | 9 (3.1%)       | 21 (3.8%)      |
| <b>Placebo used</b>                             | 77 (55.8%)       | 30 (25.2%)           | 107 (41.6%)    | 78 (60.0%)       | 41 (25.3%)           | 119 (40.8%)    | 226 (41.2%)    |
| <b>CTU or CRO support</b>                       | 93 (67.4%)       | 56 (47.1%)           | 149 (58.0%)    | 79 (60.8%)       | 83 (51.2%)           | 162 (55.5%)    | 311 (56.6%)    |
| <b>Country</b>                                  |                  |                      |                |                  |                      |                |                |
| Switzerland                                     | 91 (66.0%)       | 89 (74.8%)           | 180 (70.0%)    | 86 (66.2%)       | 131 (80.9%)          | 217 (74.3%)    | 397 (72.3%)    |
| Canada                                          | 21 (15.2%)       | 19 (16.0%)           | 40 (15.6%)     | 17 (13.1%)       | 20 (12.3%)           | 37 (12.7%)     | 77 (14.0%)     |

1  
2  
3  
4  
5  
6  
7  
8  
9  
10  
11  
12  
13  
14  
15  
16  
17  
18  
19  
20  
21  
22  
23  
24  
25  
26  
27  
28  
29  
30  
31  
32  
33  
34  
35  
36  
37  
38  
39  
40  
41  
42  
43  
44  
45  
46

|         |            |           |            |            |           |            |            |
|---------|------------|-----------|------------|------------|-----------|------------|------------|
| Germany | 26 (18.8%) | 11 (9.2%) | 37 (14.4%) | 27 (20.8%) | 11 (6.8%) | 38 (13.0%) | 75 (13.7%) |
|---------|------------|-----------|------------|------------|-----------|------------|------------|

Abbreviations: CRO, contract research organization; CTU, clinical trials unit; IQR, interquartile range.

For peer review only



### Adherence to SPIRIT in protocols from 2012 and 2016

Overall, the median proportion of reported SPIRIT items increased from 72% (IQR, 63%-79%) in 2012 to 77% (IQR, 68%-82%) in 2016 (**Table 2, Figure 1**).

**Table 2:** Adherence to SPIRIT items in RCT protocols

| Characteristic                                                    | 2012             |                      |                       | 2016              |                      |                       |
|-------------------------------------------------------------------|------------------|----------------------|-----------------------|-------------------|----------------------|-----------------------|
|                                                                   | Sponsorship      |                      | Total 2012<br>(n=257) | Sponsorship       |                      | Total 2016<br>(n=292) |
|                                                                   | Industry (n=138) | Investigator (n=119) |                       | Industry (n=130)  | Investigator (n=162) |                       |
| median (IQR)                                                      | median (IQR)     | median (IQR)         | median (IQR)          | median (IQR)      | median (IQR)         |                       |
| Absolute number of SPIRIT items reported per protocol (out of 33) | 25.5 (23.6-26.5) | 21.3 (18.3, 23.7)    | 23.7 (20.7, 26.2)     | 25.3 (23.7%-26.9) | 25.0 (21.3-27.3)     | 25.3 (22.5-27.1)      |
| <b>Proportion of SPIRIT items reported per protocol</b>           | 77% (72%-80%)    | 64% (55%-72%)        | 72% (63%-79%)         | 77% (72%-82%)     | 76% (64%-83%)        | 77% (68%-82%)         |

Abbreviations: IQR, interquartile range

1  
2  
3 Stratifying by sponsorship, we found that the comprehensiveness increased only in  
4 investigator-sponsored RCT protocols (adherence stratified by other study characteristics  
5 can be found in **Supplementary Table 2**). The median proportion of reported SPIRIT items  
6 in investigator-sponsored protocols increased from 64% (IQR, 55%-72%) in 2012 to 76%  
7 (IQR, 64%-83%) in 2016, while it remained unchanged at 77% for both years among  
8 industry-sponsored protocols (77%, IQR 72%-80% in 2012, and 77%, IQR 72%-82% in  
9 2016). This pattern was consistent across countries (**Supplementary Table 3**). Sensitivity  
10 analyses using different approaches to calculate the proportion of reported SPIRIT items  
11 provided similar results (**Supplementary Table 4**).

12  
13  
14  
15  
16  
17  
18  
19  
20  
21  
22  
23 Regarding individual SPIRIT items, we found that the improvement in investigator-sponsored  
24 RCT protocols was due to an improvement in a broad range of SPIRIT items  
25 (**Supplementary Table 5**); for 25 individual items the proportion of adherent protocols  
26 improved in investigator-sponsored RCTs by 10% or more (**Supplementary Table 6**). These  
27 25 items included descriptive (e.g. information on study registration, protocol version & date,  
28 name & contact details of sponsor) as well as methodological aspects (e.g. comparator  
29 choice explained, or allocation concealment mechanism). The largest improvements  
30 occurred with “trial registration” (SPIRIT item 2, +41.1%), “plans to disseminate trial results to  
31 key stakeholders/publication provided” (SPIRIT item 31a, +36.7%), “description of process  
32 for making amendments” (SPIRIT item 25, +34.4%), and “declaration of interests” (SPIRIT  
33 item 28, +31.6%). In industry-sponsored protocols, adherence to individual SPIRIT items  
34 remained practically stable from 2012 to 2016, i.e. items with low adherence in 2012  
35 remained low in 2016. SPIRIT items with particularly low adherence (< 30%) in both industry-  
36 and investigator-sponsored protocols were “names of protocol contributors/authors” (SPIRIT  
37 item 5a), “research question described and justified” (SPIRIT item 6a), “eligibility criteria for  
38 study centres” (SPIRIT item 10) in applicable RCTs, “location of participant recruitment” and  
39 “estimated recruitment rate” (SPIRIT item 15), “information about who will have access to the  
40 full dataset” (SPIRIT item 29), and “description of plans for granting access to full trial  
41 protocol” (SPIRIT item 31c), (**Supplementary Table 5**).

## Multivariable regression analysis

Using multivariable beta regression, we found that four characteristics were independently associated with greater reporting of SPIRIT items: multicentre RCTs (OR, 1.18; 95% CI, 1.05-1.33;  $p=0.006$ ), RCTs with reported methodological support from CTUs or CROs (OR, 1.44; 95% CI, 1.31-1.57;  $p<0.001$ ), industry-sponsored RCTs (OR, 1.20; 95% CI, 1.09-1.33;  $p<0.001$ ), and RCTs approved in 2016 (OR, 1.33; 95% CI, 1.22-1.45;  $p<0.001$ )

(**Supplementary Table 7, Figure 2**).

Adding the interaction term of year of approval and sponsorship to the model, improved the model fit (likelihood ratio test,  $\text{Chisq}=30.01$ ,  $p<0.01$ ) and provided evidence for a differential improvement in the adherence to SPIRIT over time (2012 vs 2016) for industry-sponsored and investigator-sponsored protocols suggesting that there was an improvement in investigator-sponsored protocols but not in industry-sponsored protocols (interaction  $p<0.001$ ). We did not find evidence for an interaction between year of approval and CTU/CRO support (interaction  $p=0.79$ ), i.e. protocols with or without reported support from CTUs or CROs improved to a similar extent from 2012 to 2016. Limiting our multivariable regression to investigator-sponsored protocols in an exploratory analysis, we found a notable interaction suggesting a more pronounced improvement in Swiss protocols compared with protocols from Canada or Germany (interaction  $p=0.032$ ; **Supplementary Table 8**). Sensitivity analyses using hierarchical logistic regression instead of beta regression confirmed all results.

## DISCUSSION

### Main findings and interpretation

This study of 549 RCT protocols approved by RECs in Switzerland, Canada, and Germany before (2012) and after (2016) the publication of the SPIRIT recommendations suggested a small overall improvement in reporting comprehensiveness. This change was driven by an increase in the median proportion of reported SPIRIT items in investigator-sponsored RCTs

1  
2  
3 from 64% in 2012 to 76% in 2016. Protocols of industry-sponsored RCTs remained, on  
4 average, unchanged (median of 77% SPIRIT items reported in both years). The reporting of  
5 investigator-sponsored protocols improved for the majority of individual SPIRIT items, and  
6 was independent of the planned sample size, reported support from a CTU or CRO, and  
7 centre status (single- vs multicentre) of RCTs. Single centre status, no reported support from  
8 a CTU or CRO, investigator sponsorship, and approval in 2012 were independently  
9 associated with lower adherence to the SPIRIT checklist. These results were similar across  
10 countries, but the improvement in investigator-sponsored RCT protocols appeared more  
11 pronounced among Swiss protocols compared with protocols approved in Canada or  
12 Germany. SPIRIT items with particularly low adherence in investigator- and industry  
13 sponsored protocols concerned the names of protocol contributors/authors, the justification  
14 of the research question, details about the planned participant recruitment, information about  
15 who will have access to the full dataset, and plans for granting access to the full trial protocol.  
16  
17 Our findings suggest an international improvement in the comprehensiveness of investigator-  
18 sponsored RCT protocols probably due to a combination of reasons including the publication  
19 of the SPIRIT checklist and its implementation by research institutions, funding agencies,  
20 and medical journals; the ongoing discussion about the importance of protocol publication,  
21 thoughtful planning of RCTs, and minimising reporting biases in the scientific community; and  
22 efforts to teach RCT methodology to clinician scientists in under- and postgraduate courses.  
23  
24 The more pronounced improvement of Swiss investigator-sponsored protocols could be  
25 related to a SPIRIT-based protocol template and guidance provided by swissethics<sup>22</sup> that  
26 were particularly welcomed by academic researchers or other changes in the context of the  
27 new Swiss legislation on human research from 2014.  
28  
29  
30  
31  
32  
33  
34  
35  
36  
37  
38  
39  
40  
41  
42  
43  
44  
45  
46  
47  
48  
49  
50  
51  
52

### 53 **Strengths and limitations**

54 Strengths of our study include full access to RCT protocols and associated documents from  
55 RECs in three countries. We used standardized methods and procedures for data extraction  
56 and protocol assessment at all RECs and involved only trained methodologists in this  
57  
58  
59  
60

1  
2  
3 process. This included use of piloted extraction forms with detailed written instructions as  
4 well as calibration exercises with all data extractors. More than 95% of included protocols  
5 approved in 2012 and over 80% of protocols approved in 2016 were extracted independently  
6 and in duplicate. To minimise chance associations, we considered only a limited number of  
7 variables in our statistical models.<sup>23</sup> Our results proved robust in sensitivity analyses applying  
8 alternative assumptions and statistical approaches. The fact that all Swiss RECs participated  
9 in this study strengthens the representativeness of our data for Switzerland and the  
10 additional inclusion of a German and a Canadian REC allowed for an international  
11 comparison to some extent.  
12  
13  
14  
15  
16  
17  
18  
19  
20  
21

22 Our study has several limitations. First, we used a convenience sample of two RECs outside  
23 of Switzerland (Freiburg in Germany, Hamilton in Canada) but we cannot be certain if they  
24 are representative of other RECs in these or other countries. Second, we used RCT  
25 protocols that had already been approved by RECs, therefore SPIRIT items such as  
26 “research ethics approval” and “consent forms provided” were always fulfilled and could not  
27 discriminate more comprehensive from less comprehensive protocols. Third, although we  
28 had adequate statistical power to detect even interactions within the subgroup of  
29 investigator-sponsored protocols, the number of included protocols approved outside of  
30 Switzerland was relatively small (28%; 152/549), limiting the precision of estimates for  
31 German and Canadian protocols. Fourth, 15% of included protocols were not evaluated in  
32 duplicate which could have increased the risk of bias in our study. However, these protocols  
33 were from different RECs in Switzerland and they were handled by one of the two most  
34 experienced data extractors only, so we feel that a relevant increase in the risk of bias is  
35 unlikely. Fifth, we are not aware of the fact that any of the participating RECs explicitly  
36 endorsed SPIRIT guidance, however, in Switzerland a new protocol template provided by  
37 swissethics became available which was influenced by SPIRIT impacting the generalisability  
38 of our results. In addition, it remains unclear to what extent our findings can be extrapolated  
39 to trial protocols from middle- or low-income countries and to protocols from medical  
40 disciplines underrepresented in our sample (e.g. dentistry or geriatrics; **Supplementary**  
41  
42  
43  
44  
45  
46  
47  
48  
49  
50  
51  
52  
53  
54  
55  
56  
57  
58  
59  
60

1  
2  
3 **Table 9**). Finally, our findings are not proof of causality due to the observational nature of this  
4 study, however, it is plausible that the publication of the SPIRIT statement at least  
5 contributed to an increase in the comprehensiveness of investigator-sponsored protocols.  
6  
7 Investigations of a potential time trend with gradually increasing comprehensiveness of  
8 investigator-sponsored protocols by year tertiles did not suggest a continuous development,  
9 but rather a one-step-effect (**Supplementary Figure 2**).

### 16 **Comparison with other studies**

17  
18 Few studies in the literature have used<sup>16</sup> or planned to use<sup>17 18 24</sup> the SPIRIT checklist as a  
19 tool to assess the comprehensiveness of trial protocols. One study investigated 75 RCT  
20 protocols from the UK National Institute for Health Research (NIHR) Health Technology  
21 Assessment (HTA) programme on the reporting of patient-reported outcomes and the  
22 association with general protocol completeness according to SPIRIT.<sup>16</sup> They found that these  
23 investigator-sponsored UK RCT protocols from 2012 and 2013 reported, on average, 63% of  
24 SPIRIT checklist items, which is very similar to our findings for investigator-sponsored RCT  
25 protocols from 2012. Apart from the ongoing study using protocols from UK RECs (ASPIRE-  
26 UK<sup>19</sup>), we are not aware of any other study evaluating the comprehensiveness of RCT  
27 protocols before and after the publication of the SPIRIT statement in industry- and  
28 investigator-sponsored protocols.  
29  
30  
31  
32  
33  
34  
35  
36  
37  
38  
39  
40  
41

42 There are studies assessing the quality of RCT protocols using measures other than the  
43 SPIRIT checklist. An analysis of drug trial protocols submitted to three Dutch RECs in  
44 2010/11 focused on critical comments by RECs.<sup>25</sup> They found that applicants of investigator-  
45 sponsored trials received more critical comments on participant selection, methodology, and  
46 statistical analysis than applicants of industry-sponsored trials, resonating with our findings of  
47 less comprehensive investigator-sponsored protocols compared with industry protocols in  
48 2012. Similarly, studies by Getz et al. used the proportion of protocols with substantial  
49 amendments as a measure of RCT protocol quality in the industry setting showing that more  
50 comprehensive protocols could have prevented amendments.<sup>11 12</sup> Finally, a study of 596  
51  
52  
53  
54  
55  
56  
57  
58  
59  
60

1  
2  
3 published RCT protocols from 2001 to 2011 assessed protocol quality (high versus low)  
4 based on reporting of the allocation method, allocation concealment, and intention-to-treat  
5 analysis.<sup>26</sup> This study found a substantial improvement in some methodological aspects of  
6 protocols (e.g. allocation concealment), but acknowledged the overall low proportion of high  
7 quality protocols with 24% in 2001-2004, 31% in 2005-2008, and 37% in 2008-2011.  
8  
9  
10  
11  
12

### 13 **Implications**

14  
15  
16 Incomplete protocols may jeopardize the clinical research process at all stages with  
17 potentially harmful consequences for patients, decision-makers in health care, the scientific  
18 community, and society as a whole. Whether there is indeed an association between better  
19 reported or more comprehensive RCT protocols and better methodology, successful trial  
20 conduct, and/or publication of RCTs remains to be established. Based on the RCT sample of  
21 this study, we will examine the relationship between completeness of RCT protocols and  
22 risks for premature discontinuation or non-publication of RCTs as well as potential  
23 improvements between 2012 and 2016 in terms of fewer trial discontinuations and non-  
24 publications particularly for investigator-sponsored RCTs in subsequent investigations <sup>19</sup>.  
25  
26  
27  
28  
29  
30  
31  
32  
33  
34

35 Our results show improvement in the reporting quality of investigator-sponsored trial  
36 protocols such that they became consistent with industry protocols. About why industry  
37 protocols have not improved according to SPIRIT between 2012 and 2016, we can only  
38 speculate. It might be that routines and processes for writing trial protocols have been well  
39 established at companies earlier explaining our finding of consistently low adherence to  
40 specific SPIRIT items in 2012 and 2016 in industry-sponsored protocols. So, as long as  
41 regulators do not make specific protocol templates mandatory for all applicants, industry may  
42 not adapt routines and templates according to SPIRIT.  
43  
44  
45  
46  
47  
48  
49  
50  
51

52 Our finding of insufficient reporting of names of protocol contributors/authors, the justification  
53 of the research question, details about the planned participant recruitment, information about  
54 who will have access to the full dataset, and plans for granting access to the full trial protocol  
55 guides involved stakeholders with respect to further needs for protocol improvement. The  
56  
57  
58  
59  
60

1  
2  
3 identified items constitute important pieces of information to enable a valid assessment of the  
4 relevance, feasibility, and transparency of planned clinical trials.  
5  
6  
7  
8  
9

## 10 **Conclusions**

11  
12 This before-and-after study suggests that the comprehensiveness of investigator-sponsored  
13 RCT protocols from Switzerland, Canada, and Germany improved after publication of the  
14 SPIRIT checklist, achieving a similar reporting quality as industry-sponsored protocols.  
15  
16

17 Single centre status, no reported support from a CTU or CRO, investigator sponsorship, and  
18 approval in 2012 were independently associated with lower adherence to SPIRIT. Further  
19 means are needed to improve the reporting of RCT protocols particularly with respect to  
20 protocol authorship, justification of the research question, participant recruitment, access to  
21 the full dataset, and plans for granting access to the full trial protocol. Future research should  
22 clarify the relationship between protocol quality and success of subsequent trial conduct and  
23 publication.  
24  
25  
26  
27  
28  
29  
30  
31  
32  
33  
34  
35  
36

## 37 **DECLARATIONS**

38  
39 **Ethics approval and consent to participate:** All participating ethics committees are project  
40 partners.  
41  
42

43 **Consent for publication:** Not applicable.  
44

45 **Availability of data and material:** Data underlying this article will be shared on reasonable  
46 request to the corresponding author  
47  
48

49 **Data access, responsibility, and analysis:** DG had full access to all the data in the study  
50 and takes responsibility for the integrity of the data and the accuracy of the data analysis.  
51  
52

53 **Competing interests:** BvN is currently employed by Roche Pharma AG, Grenzach-Wyhlen,  
54 Germany. BK is currently employed by iOMEDICO AG, Freiburg, Germany. All other authors  
55 declare no financial relationships with any organization that might have an interest in the  
56  
57  
58  
59  
60



1  
2  
3 submitted work and no other relationships or activities that could appear to have influenced  
4  
5 the submitted work.  
6  
7

8 **Funding:** This work was supported by the Swiss Federal Office of Public Health. The funder  
9  
10 has no role in the study design, data collection and analysis, decision to publish, or  
11  
12 preparation of this manuscript. BS is supported by an Advanced Postdoc.Mobility grant from  
13  
14 the Swiss National Science Foundation (P300PB\_177933). SIL participates in this project  
15  
16 during her research stay at the Institute for Evidence in Medicine, University of Freiburg,  
17  
18 supported by the Alexander von Humboldt Foundation, Germany.  
19

20 **Authors' contributions:** AO, SH, EvE, BK, and MB conceived of the study. EvE and MB  
21  
22 acquired funding. RS developed the web-tool for data extractions. DG, BvN, BS, and MB  
23  
24 coordinated data extraction from protocols. DG, GM and MB developed the data analysis  
25  
26 plan and interpreted the data. DG performed the data analysis. MB and DG wrote the first  
27  
28 draft of the manuscript. DG, BvN, BS, BK, EOR, AB, StS, DM, YT, AA, CPM, VG, KB, Kku,  
29  
30 LR, SIL, JM, AN, KKI, NG, ATH, JW, NC, PJHH, KMC, SiS, JWB, ArA, MS, LH, SH, KW, EvE  
31  
32 and MB were involved in data collection and critically revised the manuscript. All authors  
33  
34 approved the final version before submission.  
35  
36

37 **Acknowledgments:** We are grateful to Prof. Doug Altman (University of Oxford) who was  
38  
39 instrumental in developing the initial concept of the Adherence to SPIrit REcommendations  
40  
41 (ASPIRE) study and who sadly died before it came to fruition. We thank all participating  
42  
43 Research Ethics Committees from Germany (Freiburg), Switzerland (Basel, Ticino, Bern,  
44  
45 Geneva, Lausanne, St. Gallen, Thurgau, Zurich), Canada (Hamilton), and the UK (National  
46  
47 Health Service Health Research Authority) for their support and cooperation.  
48  
49

50 **Authors' information (optional):** Not applicable  
51  
52  
53  
54  
55  
56  
57  
58  
59  
60

## References

1. World Medical Association. WMA Declaration of Helsinki - ethical principles for medical research involving human subjects 2013 [Available from: <https://www.wma.net/policies-post/wma-declaration-of-helsinki-ethical-principles-for-medical-research-involving-human-subjects/2020>].
2. Dwan K, Altman DG, Cresswell L, et al. Comparison of protocols and registry entries to published reports for randomised controlled trials. *Cochrane Database Syst Rev* 2011(1):MR000031.
3. Tetzlaff JM, Chan AW, Kitchen J, et al. Guidelines for randomized clinical trial protocol content: a systematic review. *Syst Rev* 2012;1:43.
4. Scharf O, Colevas AD. Adverse event reporting in publications compared with sponsor database for cancer clinical trials. *J Clin Oncol* 2006;24(24):3933-8.
5. Pildal J, Chan AW, Hrobjartsson A, et al. Comparison of descriptions of allocation concealment in trial protocols and the published reports: cohort study. *BMJ* 2005;330(7499):1049.
6. Hrobjartsson A, Pildal J, Chan AW, et al. Reporting on blinding in trial protocols and corresponding publications was often inadequate but rarely contradictory. *J Clin Epidemiol* 2009;62(9):967-73.
7. Chan A, Hróbjartsson A, Haahr MT, et al. Empirical evidence for selective reporting of outcomes in randomized trials: Comparison of protocols to published articles. *JAMA* 2004;291(20):2457-65.
8. Al-Marzouki S, Roberts I, Evans S, et al. Selective reporting in clinical trials: analysis of trial protocols accepted by The Lancet. *The Lancet* 2008;372(9634):201.
9. Smyth RM, Kirkham JJ, Jacoby A, et al. Frequency and reasons for outcome reporting bias in clinical trials: interviews with trialists. *BMJ* 2011;342:c7153.
10. Decullier E, Lhéritier V, Chapuis F. Fate of biomedical research protocols and publication bias in France: retrospective cohort study. *BMJ* 2005;331(7507):19.
11. Getz KA, Zuckerman R, Cropp AB, et al. Measuring the Incidence, Causes, and Repercussions of Protocol Amendments. *Drug Information Journal* 2011;45(3):265-75.
12. Getz KA, Stergiopoulos S, Short M, et al. The Impact of Protocol Amendments on Clinical Trial Performance and Cost. *Therapeutic Innovation & Regulatory Science* 2016;50(4):436-41.
13. Chan AW, Tetzlaff JM, Altman DG, et al. SPIRIT 2013 statement: defining standard protocol items for clinical trials. *Ann Intern Med* 2013;158(3):200-7.
14. Chan A-W, Tetzlaff JM, Gøtzsche PC, et al. SPIRIT 2013 explanation and elaboration: guidance for protocols of clinical trials. *BMJ* 2013;346:e7586.
15. The SPIRIT Group. SPIRIT Endorsement [Available from: <https://www.spirit-statement.org/about-spirit/spirit-endorsement/> accessed 15 August 2021].
16. Kyte D, Duffy H, Fletcher B, et al. Systematic Evaluation of the Patient-Reported Outcome (PRO) Content of Clinical Trial Protocols. *PLoS ONE* 2014;9(10):e110229.
17. Madden K, Arseneau E, Evaniew N, et al. Reporting of planned statistical methods in published surgical randomised trial protocols: a protocol for a methodological systematic review. *BMJ Open* 2016;6(6):e011188.
18. Thabane A, Dennis BB, Gajic-Veljanoski O, et al. Reporting quality of stepped wedge design randomized trials: a systematic review protocol. *Clin Epidemiol* 2016;8:261-6.
19. Gryaznov D, Odutayo A, von Niederhäusern B, et al. Rationale and design of repeated cross-sectional studies to evaluate the reporting quality of trial protocols: the Adherence to SPiRit REcommendations (ASPIRE) study and associated projects. *Trials* 2020;21(1):896.
20. Kasenda B, von Elm E, You J, et al. Prevalence, characteristics, and publication of discontinued randomized trials. *JAMA* 2014;311(10):1045-52.
21. Ferrari S, Cribari-Neto F. Beta Regression for Modelling Rates and Proportions. *Journal of Applied Statistics* 2004;31(7):799-815.
22. Swiss Association of Research Ethics Committees. Study protocols. Available at: <https://swissethics.ch/en/templates/studienprotokollvorlagen>. (Accessed on 20 Apr 2021)23. Babyak MA. What You See May Not Be What You Get: A Brief, Nontechnical Introduction to Overfitting in Regression-Type Models. *Psychosomatic Medicine* 2004;66(3):411-21.

- 1  
2  
3 24. Ahmed K, Kyte D, Keeley T, et al. Systematic evaluation of patient-reported outcome (PRO) protocol  
4 content and reporting in UK cancer clinical trials: the EPiC study protocol. *BMJ Open*  
5 2016;6(9):e012863.  
6  
7 25. van Lent M, Rongen GA, Out HJ. Shortcomings of protocols of drug trials in relation to sponsorship as  
8 identified by Research Ethics Committees: analysis of comments raised during ethical review. *BMC*  
9 *Medical Ethics* 2014;15(1):83.  
10  
11 26. van Rosmalen BV, Alldinger I, Cieslak KP, et al. Worldwide trends in volume and quality of published  
12 protocols of randomized controlled trials. *PloS one* 2017;12(3):e0173042-e42.  
13  
14  
15  
16  
17  
18  
19  
20  
21  
22  
23  
24  
25  
26  
27  
28  
29  
30  
31  
32  
33  
34  
35  
36  
37  
38  
39  
40  
41  
42  
43  
44  
45  
46  
47  
48  
49  
50  
51  
52  
53  
54  
55  
56  
57  
58  
59  
60

For peer review only

## Figure Legends

**Figure 1:** Proportion of reported SPIRIT items by year and trial sponsorship

**Figure 2:** Association between comprehensiveness of trial protocols and trial characteristics, accessed by multivariable beta regression

Abbreviations: CTU, Clinical Trials Unit; CRO, Contract Research Organization; CI, confidence interval. \* Interaction terms were added to the multivariable model one at a time.

For peer review only

1  
2  
3  
4  
5  
6  
7  
8  
9  
10  
11  
12  
13  
14  
15  
16  
17  
18  
19  
20  
21  
22  
23  
24  
25  
26  
27  
28  
29  
30  
31  
32  
33  
34  
35  
36  
37  
38  
39  
40  
41  
42  
43  
44  
45  
46  
47  
48  
49  
50  
51  
52  
53  
54  
55  
56  
57  
58  
59  
60

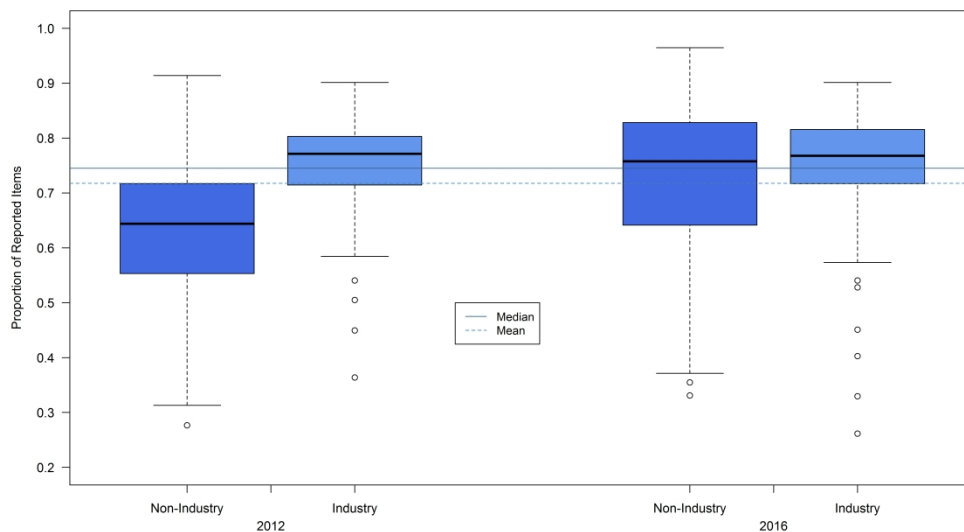

Figure 1: Proportion of reported SPIRIT items by year and study sponsorship

330x203mm (500 x 500 DPI)

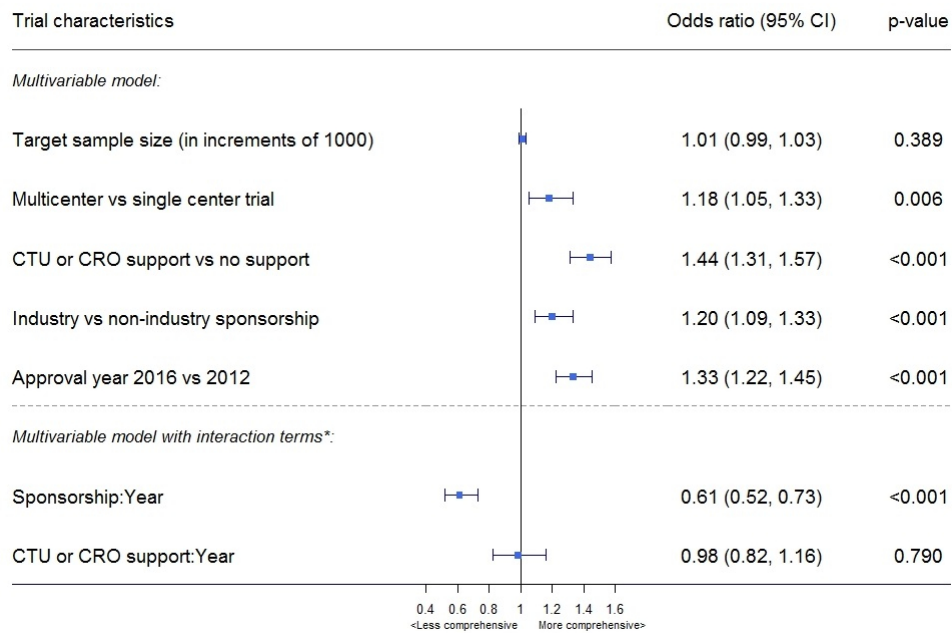

Figure 2: Association between comprehensiveness of trial protocols and trial characteristics, accessed by multivariable beta regression

Abbreviations: CTU, Clinical Trials Unit; CRO, Contract Research Organization; CI, confidence interval. \* Interaction terms were added to the multivariable model one at a time.

# Reporting quality of clinical trial protocols: a repeated cross sectional study about the Adherence to SPIrit Recommendations in Switzerland, CANada, and GERmany (ASPIRE-SCAGE)

## Supplementary material

1. **Supplementary Figure 1:** “Flow diagram for included randomised clinical trial protocols in ASPIRE with ethics approval in 2012 and 2016 from Switzerland, Germany, and Canada”
2. **Supplementary Figure 2:** Box-plots of proportions of reported SPIRIT items by year and tertile in investigator-sponsored protocols
3. **Supplementary Table 1:** Data Extraction Form
4. **Supplementary Table 2:** Adherence to SPIRIT items in RCT protocols by approval year and median target sample size, multicentre vs single centre trials, and with vs without CTU or CRO support
5. **Supplementary Table 3:** Adherence to SPIRIT items in RCT protocols by country and sponsorship
6. **Supplementary Table 4:** Sensitivity analyses of calculating the adherence to SPIRIT items for RCT protocols by sponsorship
7. **Supplementary Table 5:** Adherence to individual SPIRIT items by year and sponsorship
8. **Supplementary Table 6:** Adherence to SPIRIT items in Investigator-sponsored protocols that improved by 10% or more
9. **Supplementary Table 7:** Results from multivariable Beta and Logistic regressions for all approaches
10. **Supplementary Table 8:** Results from multivariable Beta regression, subset of Investigator-sponsored protocols
11. **Supplementary Table 9:** Medical disciplines of included RCTs

## Supplementary Figure 1

**Figure 1A:** Flow diagram for included randomized clinical trial protocols in ASPIRE with ethics approval in 2012

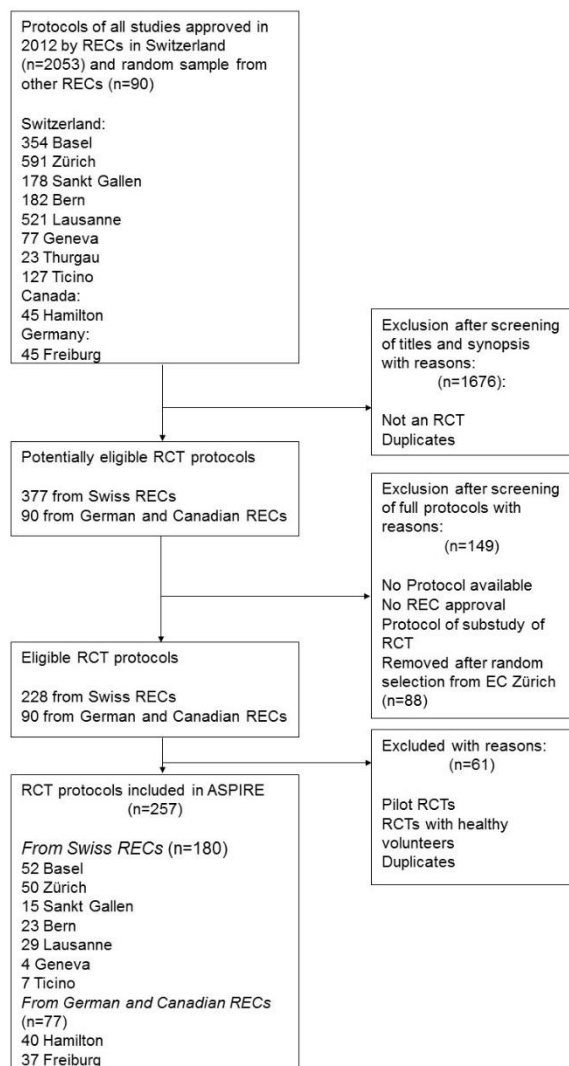

**Figure 1B:** Flow diagram for included randomized clinical trial protocols in ASPIRE with ethics approval in 2016

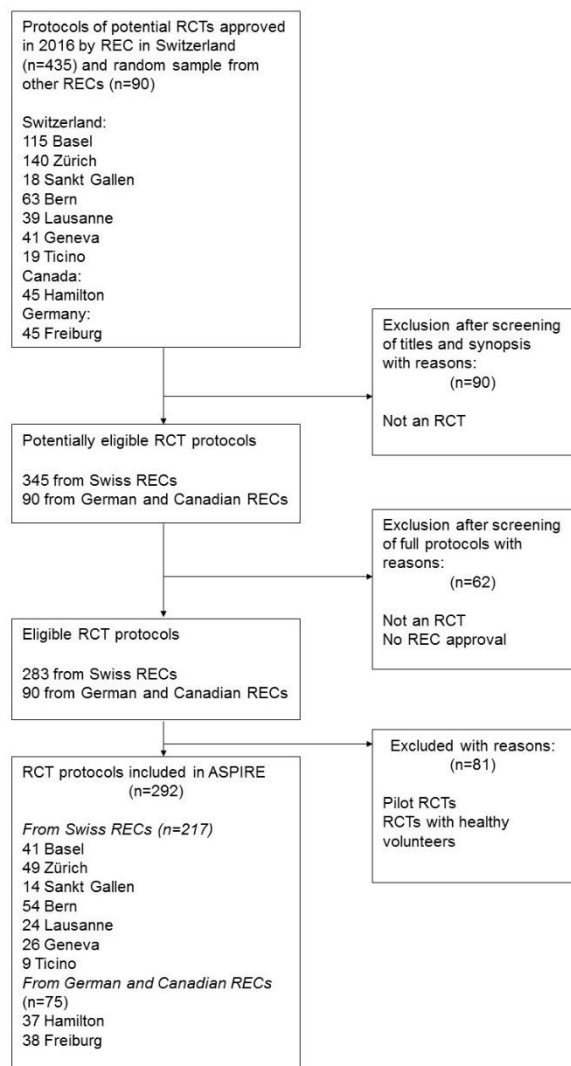

Abbreviations: REC: Research Ethic Committee; RCT: Randomised clinical trial

**Legend Supplementary eFigure 1:** Flow diagram for included randomised clinical trial protocols in ASPIRE with ethics approval in 2012 and 2016 from Switzerland, Germany, and Canada



Supplementary Figure 2

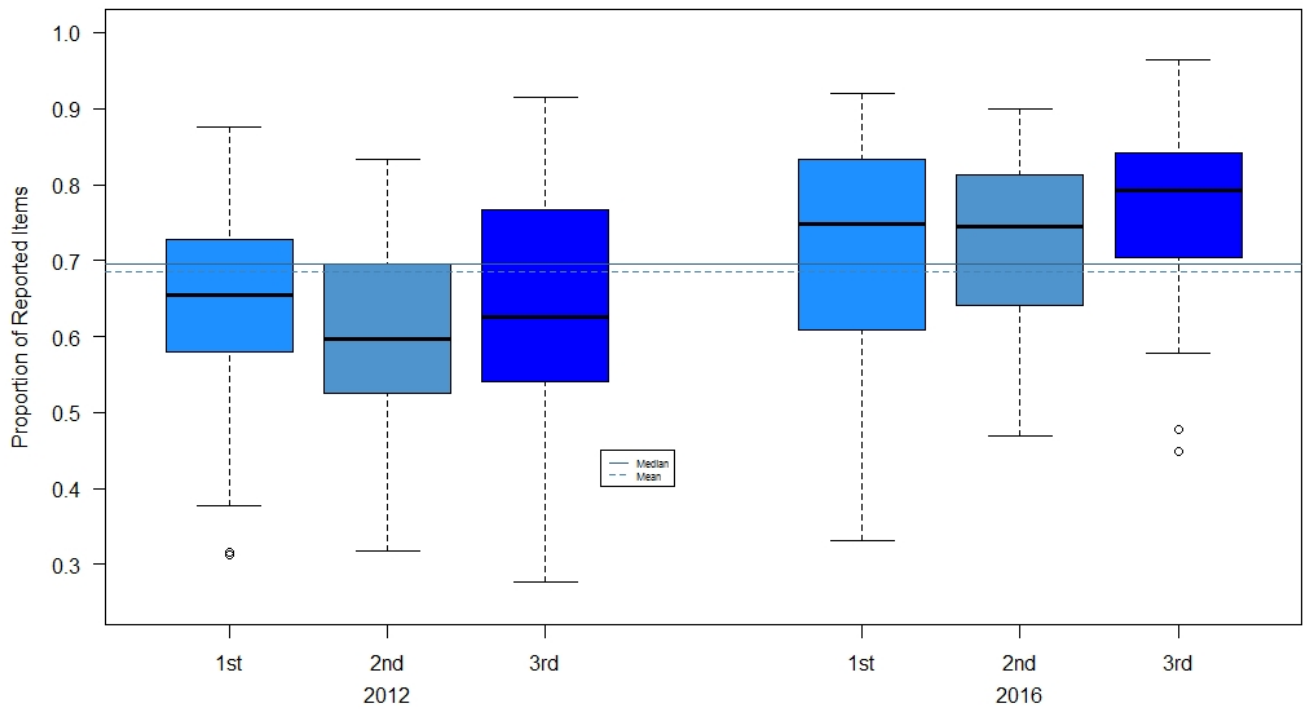

Legend Supplementary eFigure 2: Box-plots of proportions of reported SPIRIT items by year and tertile in investigator-sponsored protocols

## Supplementary Table 1

### Data Extraction Form

| Label                                                                                          | Options                                                  |
|------------------------------------------------------------------------------------------------|----------------------------------------------------------|
| 1. Country of Ethics Committee                                                                 |                                                          |
| 2. Name of Ethics Centre                                                                       |                                                          |
| 3. Local Ethics Identification Number                                                          |                                                          |
| 4. Sponsor name (title, first name, surname, company if applicable)                            |                                                          |
| 5. Sponsor email address                                                                       |                                                          |
| 6. Site/Location of overall study initiation (PI affiliation)                                  | Switzerland                                              |
|                                                                                                | Other                                                    |
|                                                                                                | Not reported                                             |
| If site initiation in Switzerland, please provide name and location of institution:            |                                                          |
| 7. Study Acronym                                                                               |                                                          |
| 8. Study Title (Exact Quote)                                                                   |                                                          |
| 9. Date of Ethics Application                                                                  |                                                          |
| 9a. Date of first RESPONSE by Ethics Committee (does not need to be the same as approval date) |                                                          |
| 9b. Response category (Switzerland specific, others select "not applicable")                   | A positiv                                                |
|                                                                                                | B positiv mit Bemerkung                                  |
|                                                                                                | C mit Auflage,<br>Nachbegutachtung<br>notwendig          |
|                                                                                                | C mit Auflage, schriftliche<br>Mitteilung ausreichend    |
|                                                                                                | D negativ                                                |
|                                                                                                | E Nicht-Eintreten                                        |
|                                                                                                | Not applicable as Ethics<br>Committee not in Switzerland |
| 10. Date of first APPROVAL by Ethics Committee                                                 |                                                          |
| 11. Clinical Area                                                                              | Medical                                                  |
|                                                                                                | Surgical                                                 |
|                                                                                                | Paediatrics                                              |
|                                                                                                | Other                                                    |
| If medical area, choose from list                                                              | Neurology                                                |
|                                                                                                | Cardiovascular                                           |
|                                                                                                | Respiratory                                              |
|                                                                                                | Gastro/intestinal                                        |
|                                                                                                | Nephrology                                               |
|                                                                                                | Rheumatology                                             |
|                                                                                                | Infectious Disease                                       |
|                                                                                                | Oncology                                                 |
|                                                                                                | Intensive Care                                           |
| Hematology                                                                                     |                                                          |

|    |                                            |                        |
|----|--------------------------------------------|------------------------|
| 1  |                                            | Endocrinology          |
| 2  |                                            | Dermatology            |
| 3  |                                            | Anaesthetics           |
| 4  |                                            | Psychiatry             |
| 5  |                                            | Other                  |
| 6  | If surgical area, choose from list         | General Surgery        |
| 7  |                                            | Obstetrics/Gynecology  |
| 8  |                                            | Neurosurgery           |
| 9  |                                            | Ophthalmology          |
| 10 |                                            | Ear-nose-throat (ENT)  |
| 11 |                                            | Cardiothoracic         |
| 12 |                                            | Urology                |
| 13 |                                            | Orthopedics            |
| 14 |                                            | Plastic Surgery        |
| 15 |                                            | Other                  |
| 16 | If pediatrics area, choose from list       | Neurology              |
| 17 |                                            | Cardiovascular         |
| 18 |                                            | Respiratory            |
| 19 |                                            | Gastro/intestinal      |
| 20 |                                            | Nephrology             |
| 21 |                                            | Rheumatology           |
| 22 |                                            | Infectious diseases    |
| 23 |                                            | Oncology               |
| 24 |                                            | Intensive care         |
| 25 |                                            | Hematology             |
| 26 |                                            | Endocrinology          |
| 27 |                                            | Dermatology            |
| 28 |                                            | Anaesthetics           |
| 29 |                                            | General surgery        |
| 30 |                                            | Neurosurgery           |
| 31 |                                            | Ophthalmology          |
| 32 |                                            | Ear-nose-throat (ENT)  |
| 33 |                                            | Cardiothoracic         |
| 34 |                                            | Urology                |
| 35 |                                            | Orthopedics            |
| 36 | Plastic Surgery                            |                        |
| 37 | Other                                      |                        |
| 38 | 12. Trial Registration Number              |                        |
| 39 | 13. Trial Registry Name                    | Clinicaltrials.gov     |
| 40 |                                            | ISRCTN                 |
| 41 |                                            | EudraCT                |
| 42 |                                            | ANZCTR                 |
| 43 |                                            | Not reported           |
| 44 |                                            | Other (please specify) |
| 45 | 14. Swiss Human Research Act Risk Category | A                      |

|                                                                                                                                                |                                                                                                               |
|------------------------------------------------------------------------------------------------------------------------------------------------|---------------------------------------------------------------------------------------------------------------|
|                                                                                                                                                | B                                                                                                             |
|                                                                                                                                                | C                                                                                                             |
|                                                                                                                                                | Not applicable                                                                                                |
|                                                                                                                                                | Not reported                                                                                                  |
| 15. Is trial labelled as pilot or feasibility trial?                                                                                           | Yes                                                                                                           |
|                                                                                                                                                | No                                                                                                            |
| 16. Is it a dose finding trial?                                                                                                                | Yes                                                                                                           |
|                                                                                                                                                | No                                                                                                            |
| 17. Hypothesis (check all that apply)                                                                                                          | Superiority                                                                                                   |
|                                                                                                                                                | Non-inferiority / Equivalence                                                                                 |
|                                                                                                                                                | Not labelled in this regard / unclear                                                                         |
| 18. Please copy the primary outcome(s) from the protocol                                                                                       |                                                                                                               |
| 19. Are any outcomes specifically labelled as "adverse events", "adverse effects", "side effects", or "tolerability"?                          | Yes                                                                                                           |
|                                                                                                                                                | No                                                                                                            |
| If yes, adverse events (or synonyms thereof) are...                                                                                            | not further specified (e.g. the term adverse events is just mentioned under outcome section)                  |
|                                                                                                                                                | specifically defined (e.g. specific types of adverse events such as rash, itching, nausea etc. are mentioned) |
| 20. Is a patient-reported outcome specified (an outcome that comprises information reported by a patient or a caregiver (parent or guardian))? | Yes                                                                                                           |
|                                                                                                                                                | No                                                                                                            |
| If yes: the specified patient-reported outcome captures the following information (check all that apply):                                      | Symptoms (pain, headaches, sleeplessness, etc.)                                                               |
|                                                                                                                                                | Physical functioning                                                                                          |
|                                                                                                                                                | Mental/emotional functioning                                                                                  |
|                                                                                                                                                | Social functioning                                                                                            |
|                                                                                                                                                | Disease-specific outcome measure (eg. Asthma QoL questionnaire, Beck Depression Inventory)                    |
|                                                                                                                                                | Multidimensional health-related quality of life (HRQL; eg. SF-36)                                             |
|                                                                                                                                                | Overall sense of well-being in one question (holistic HRQL; eg. captured with a VAS)                          |
|                                                                                                                                                | Satisfaction with treatment                                                                                   |

|                                                                                         |                                                                                 |
|-----------------------------------------------------------------------------------------|---------------------------------------------------------------------------------|
|                                                                                         | Utility (an individual's preferences/values for certain health states/outcomes) |
|                                                                                         | Other (please specify)                                                          |
| If yes: patient-reported outcome + measurement instrument                               |                                                                                 |
| If yes, patient-reported outcome used for sample size calculation?                      | Yes                                                                             |
|                                                                                         | No                                                                              |
| If yes, minimal important difference (MID) mentioned?                                   | Yes                                                                             |
|                                                                                         | No                                                                              |
| If yes, reference for MID? (please enter full citation or if not reported, enter "NR")  |                                                                                 |
| 20a. Is routinely collected data used in the study?                                     | Yes                                                                             |
|                                                                                         | No                                                                              |
| 20b. If yes, routinely collected data is used:                                          | For patient identification and/or recruitment?                                  |
|                                                                                         | As part of the randomized intervention?                                         |
|                                                                                         | For any of the planned outcomes?                                                |
|                                                                                         | Other                                                                           |
| 21. Any planned collection of costs or cost-effectiveness analysis mentioned?           | Yes                                                                             |
|                                                                                         | No                                                                              |
| 22. The setting for the majority of recruited patients is (check all that apply)        | Community                                                                       |
|                                                                                         | Outpatient clinic                                                               |
|                                                                                         | Emergency department                                                            |
|                                                                                         | In-patients hospital care                                                       |
|                                                                                         | Intensive care unit                                                             |
|                                                                                         | Unclear                                                                         |
| 23. The age-group of patient population is (check all that apply)                       | Adults (>=16 years)                                                             |
|                                                                                         | Only elderly (>=60)                                                             |
|                                                                                         | Pediatric (<18)                                                                 |
| 24. Please specify the study population                                                 |                                                                                 |
| 25. Estimated sample size/number of participants                                        |                                                                                 |
| 26. Number of overall study centres                                                     |                                                                                 |
| 27. If multicentre, national or multinational                                           | National                                                                        |
|                                                                                         | International                                                                   |
|                                                                                         | Not applicable                                                                  |
| 28. Number of study centres recruiting in Switzerland (or Canada/Germany if applicable) |                                                                                 |
| 29. Trial Design (check all that apply)                                                 | Parallel                                                                        |
|                                                                                         | Crossover                                                                       |
|                                                                                         | Cluster                                                                         |
|                                                                                         | Factorial                                                                       |
|                                                                                         | Split Body                                                                      |
|                                                                                         | Other                                                                           |

|                                                                                                                                        |                                                    |
|----------------------------------------------------------------------------------------------------------------------------------------|----------------------------------------------------|
|                                                                                                                                        | Not applicable                                     |
| 30. Number of trial arms                                                                                                               |                                                    |
| 31. Presence of logistic/ methodological support/experience? (check all that apply)                                                    | Clinical trial unit (CTU)                          |
|                                                                                                                                        | Contract Research Organization (CRO)               |
|                                                                                                                                        | Evidence for ample expertise of the PI/Institution |
|                                                                                                                                        | Not reported                                       |
|                                                                                                                                        | Other                                              |
| 32. Please specify the intervention(s)                                                                                                 |                                                    |
| 33. Intervention category/ies                                                                                                          | Drug                                               |
|                                                                                                                                        | Surgery / Invasive Procedure                       |
|                                                                                                                                        | Device                                             |
|                                                                                                                                        | Vaccine                                            |
|                                                                                                                                        | Radiation                                          |
|                                                                                                                                        | Rehabilitation                                     |
|                                                                                                                                        | Behavioural / Lifestyle / Education / Counselling  |
|                                                                                                                                        | Dietary Supplement                                 |
| Other                                                                                                                                  |                                                    |
| 34. Please specify the control(s)                                                                                                      |                                                    |
| 35. Type of control(s)                                                                                                                 | No treatment / Standard care                       |
|                                                                                                                                        | Active (drug/other treatment)                      |
|                                                                                                                                        | Placebo / Sham                                     |
| 36. Name of funder(s)                                                                                                                  |                                                    |
| 37. Initiation/Sponsorship                                                                                                             | Definitely industry initiated                      |
|                                                                                                                                        | Probably industry initiated                        |
|                                                                                                                                        | Probably investigator initiated                    |
|                                                                                                                                        | Definitely investigator initiated                  |
| 38. Title: Basic study design, patient population, and intervention provided in study title (if applicable trial acronym)? (reporting) | Yes                                                |
|                                                                                                                                        | No                                                 |
| 39. Trial Registration: Registry name and trial identifier provided? (reporting)                                                       | Yes                                                |
|                                                                                                                                        | No                                                 |
| 40. Protocol: Version Number and date provided? (reporting)                                                                            | Yes                                                |
|                                                                                                                                        | No                                                 |
| 41. Funding: Sources of financial and non-financial support declared? (reporting)                                                      | Yes                                                |
|                                                                                                                                        | No                                                 |
| 42. Roles and Responsibilities: Names of protocol contributors/ authors provided? (reporting)                                          | Yes                                                |
|                                                                                                                                        | No                                                 |
|                                                                                                                                        | Yes                                                |

|                                                                                                                                                                                                                          |                |
|--------------------------------------------------------------------------------------------------------------------------------------------------------------------------------------------------------------------------|----------------|
| 43. Roles and Responsibilities: Name and contact details of sponsor provided? (reporting)                                                                                                                                | No             |
| 44. Roles and Responsibilities: Role of sponsor and funder in trial described? (reporting)                                                                                                                               | Yes            |
|                                                                                                                                                                                                                          | No             |
| 45. Roles and Responsibilities: Steering Committee General Membership and Role described? (reporting)                                                                                                                    | Yes            |
|                                                                                                                                                                                                                          | No             |
|                                                                                                                                                                                                                          | Not applicable |
| 46. Background and rationale: Is research question described and justified? (as a minimum, we expect a systematic search, see info) (reporting)                                                                          | Yes            |
|                                                                                                                                                                                                                          | No             |
| 46a. Systematic review on PICO explicitly mentioned in background/introduction?                                                                                                                                          | Yes            |
|                                                                                                                                                                                                                          | No             |
| 47. Background and rationale: Comparator choice explained? (reporting)                                                                                                                                                   | Yes            |
|                                                                                                                                                                                                                          | No             |
| 48. Objectives: Specific objectives described for each comparison (if multiple)? (reporting)                                                                                                                             | Yes            |
|                                                                                                                                                                                                                          | No             |
| 49. Trial design: Trial design described? (trial type (eg, parallel group, crossover, factorial, single group), allocation ratio, and framework (eg, superiority, equivalence, noninferiority, exploratory)) (reporting) | Yes            |
|                                                                                                                                                                                                                          | No             |
| 50. Study Setting: Are countries where data will be collected listed? (reporting)                                                                                                                                        | Yes            |
|                                                                                                                                                                                                                          | No             |
| 51. Eligibility criteria: Inclusion and exclusion criteria for trial participants described? (reporting)                                                                                                                 | Yes            |
|                                                                                                                                                                                                                          | No             |
| 52. Eligibility criteria: Inclusion and exclusion criteria for study centres and individuals who will perform the intervention described? (reporting)                                                                    | Yes            |
|                                                                                                                                                                                                                          | No             |
|                                                                                                                                                                                                                          | Not applicable |
| 53. Intervention(drug): Generic Name, Dose and Schedule of intervention described? (reporting)                                                                                                                           | Yes            |
|                                                                                                                                                                                                                          | No             |
|                                                                                                                                                                                                                          | Not applicable |
| 54. Intervention(non-drug): Setting of intervention administration described? (reporting)                                                                                                                                | Yes            |
|                                                                                                                                                                                                                          | No             |
|                                                                                                                                                                                                                          | Not applicable |
| 55. Intervention(non-drug): Individuals administering interventions (e.g. expertise) mentioned? (reporting)                                                                                                              | Yes            |
|                                                                                                                                                                                                                          | No             |
|                                                                                                                                                                                                                          | Not applicable |
| 56. Interventions - Modifications: Standard criteria for modifications of interventions described? (reporting)                                                                                                           | Yes            |
|                                                                                                                                                                                                                          | No             |
|                                                                                                                                                                                                                          | Not applicable |
| 57. Interventions - Adherence: Are strategies to improve adherence or any procedures for monitoring adherence described? (reporting)                                                                                     | Yes            |
|                                                                                                                                                                                                                          | No             |
|                                                                                                                                                                                                                          | Not applicable |
| 58. Interventions - Concomitant care: Permitted care and interventions during trial described? (reporting)                                                                                                               | Yes            |
|                                                                                                                                                                                                                          | No             |
| 59. Primary Outcome: Specific measurement variable described? (reporting)                                                                                                                                                | Yes            |
|                                                                                                                                                                                                                          | No             |
|                                                                                                                                                                                                                          | Not applicable |
|                                                                                                                                                                                                                          | Yes            |

|    |                                                                                                            |                |
|----|------------------------------------------------------------------------------------------------------------|----------------|
| 1  |                                                                                                            |                |
| 2  |                                                                                                            |                |
| 3  |                                                                                                            |                |
| 4  | 60. Primary Outcome: Analysis metric (e.g. change from baseline) described? (reporting)                    | No             |
| 5  |                                                                                                            | Not applicable |
| 6  | 61. Primary Outcomes: Is time point of measurement mentioned? (reporting)                                  | Yes            |
| 7  |                                                                                                            | No             |
| 8  |                                                                                                            | Not applicable |
| 9  |                                                                                                            |                |
| 10 | 62. Participant timeline: Timing of visit for participants described (e.g. schematic diagram)? (reporting) | Yes            |
| 11 |                                                                                                            | No             |
| 12 | 63. Sample size: Estimated number total or per group mentioned? (reporting)                                | Yes            |
| 13 |                                                                                                            | No             |
| 14 |                                                                                                            |                |
| 15 | 64. Sample size: Outcome used for samples size calculation described? (reporting)                          | Yes            |
| 16 |                                                                                                            | No             |
| 17 |                                                                                                            | Not applicable |
| 18 |                                                                                                            |                |
| 19 | 65. Sample size: Assumed values for outcome in each study group provided? (reporting)                      | Yes            |
| 20 |                                                                                                            | No             |
| 21 |                                                                                                            | Not applicable |
| 22 |                                                                                                            |                |
| 23 | 66. Sample size: Rationale or reference for assumed outcome values provided? (reporting)                   | Yes            |
| 24 |                                                                                                            | No             |
| 25 |                                                                                                            | Not applicable |
| 26 |                                                                                                            |                |
| 27 | 67. Sample size: Type of statistical test provided? (reporting)                                            | Yes            |
| 28 |                                                                                                            | No             |
| 29 |                                                                                                            | Not applicable |
| 30 |                                                                                                            |                |
| 31 | 68. Sample size: Alpha value provided? (reporting)                                                         | Yes            |
| 32 |                                                                                                            | No             |
| 33 |                                                                                                            | Not applicable |
| 34 |                                                                                                            |                |
| 35 | 69. Sample size: Statistical Power provided? (reporting)                                                   | Yes            |
| 36 |                                                                                                            | No             |
| 37 |                                                                                                            | Not applicable |
| 38 |                                                                                                            |                |
| 39 | 70. Sample size: Adjustment for missing data, if relevant, described? (reporting)                          | Yes            |
| 40 |                                                                                                            | No             |
| 41 |                                                                                                            | Not applicable |
| 42 |                                                                                                            |                |
| 43 | 71. Sample size: Rationale for intended sample size if not derived statistically provided? (reporting)     | Yes            |
| 44 |                                                                                                            | No             |
| 45 |                                                                                                            | Not applicable |
| 46 |                                                                                                            |                |
| 47 | 72. Recruitment: Location of participant recruitment described? (reporting)                                | Yes            |
| 48 |                                                                                                            | No             |
| 49 | 73. Recruitment: Person(s) who will recruit participants described? (reporting)                            | Yes            |
| 50 |                                                                                                            | No             |
| 51 | 74. Recruitment: Expected recruitment rate provided? (reporting)                                           | Yes            |
| 52 |                                                                                                            | No             |
| 53 | 75. Recruitment: Estimated number or rate of eligible patients                                             |                |
| 54 | 76. Recruitment: Estimated duration of the patient recruitment                                             |                |
| 55 |                                                                                                            |                |
| 56 | 77. Recruitment: Monitoring of recruitment during trial mentioned? (reporting)                             | Yes            |
| 57 |                                                                                                            | No             |
| 58 |                                                                                                            |                |
| 59 | 78. Recruitment: Financial and non-financial incentives for participants described? (reporting)            | Yes            |
| 60 |                                                                                                            | No             |



|                                                                                                                                          |                |
|------------------------------------------------------------------------------------------------------------------------------------------|----------------|
|                                                                                                                                          | Not applicable |
| 79. Recruitment: Financial and non-financial incentives for investigators described? (reporting)                                         | Yes            |
|                                                                                                                                          | No             |
| 80. Allocation: Method for generation of random sequence described? ( e.g. computer-generated random numbers) (reporting)                | Yes            |
|                                                                                                                                          | No             |
|                                                                                                                                          | Not applicable |
| 81. Allocation: Ratio provided? (e.g. 1:1, 2:1) (reporting)                                                                              | Yes            |
|                                                                                                                                          | No             |
|                                                                                                                                          | Not applicable |
| 82. Allocation: Type of randomization described? (e.g. "simple", block, matched pair, etc.) (reporting)                                  | Yes            |
|                                                                                                                                          | No             |
|                                                                                                                                          | Not applicable |
| 83. Allocation: Non-random allocation-method described? (reporting)                                                                      | Yes            |
|                                                                                                                                          | No             |
|                                                                                                                                          | Not applicable |
| 84. Allocation: Rationale for non-random allocation provided? (reporting)                                                                | Yes            |
|                                                                                                                                          | No             |
|                                                                                                                                          | Not applicable |
| 85. Allocation: Allocation concealment mechanism described? (reporting)                                                                  | Yes            |
|                                                                                                                                          | No             |
|                                                                                                                                          | Not applicable |
| 86. Allocation: Person who will enroll/assign participants described? (reporting)                                                        | Yes            |
|                                                                                                                                          | No             |
|                                                                                                                                          | Not applicable |
| 87. Blinding: Status of participants described? (reporting)                                                                              | Yes            |
|                                                                                                                                          | No             |
| 88. Blinding: Status of care providers described? (reporting)                                                                            | Yes            |
|                                                                                                                                          | No             |
| 89. Blinding: Status of outcome assessors described? (reporting)                                                                         | Yes            |
|                                                                                                                                          | No             |
| 90. Blinding: Conditions when unblinding is permissible mentioned? (reporting)                                                           | Yes            |
|                                                                                                                                          | No             |
|                                                                                                                                          | Not applicable |
| 91. Data Collection: Personnel who will collect data specified? (reporting)                                                              | Yes            |
|                                                                                                                                          | No             |
| 92. Data collection: Strategies to promote participant retention and complete follow-up described? (reporting)                           | Yes            |
|                                                                                                                                          | No             |
| 93. Data Management: Data entry and coding processes described? (reporting)                                                              | Yes            |
|                                                                                                                                          | No             |
| 94. Statistical Methods: Main analysis for primary outcome including analysis methods for statistical comparisons described? (reporting) | Yes            |
|                                                                                                                                          | No             |
| 95. Statistical Methods: Handling of missing data defined? (reporting)                                                                   | Yes            |
|                                                                                                                                          | No             |
|                                                                                                                                          | Not applicable |
|                                                                                                                                          | Yes            |

|    |                                                                                                                                                                          |                           |
|----|--------------------------------------------------------------------------------------------------------------------------------------------------------------------------|---------------------------|
| 1  |                                                                                                                                                                          |                           |
| 2  |                                                                                                                                                                          |                           |
| 3  | 96. Statistical Methods: Effect measure for primary analysis clearly specified? (e.g. risk ratio, odds ratio etc.) (reporting)                                           | No                        |
| 4  |                                                                                                                                                                          |                           |
| 5  | 97. Statistical Methods: Significance level specified? (e.g. alpha of 5% or p<0.05) (reporting)                                                                          | Yes                       |
| 6  |                                                                                                                                                                          | No                        |
| 7  |                                                                                                                                                                          |                           |
| 8  | 98. Statistical Methods: Use of confidence intervals mentioned? (e.g. "results will be accompanied by a confidence interval") (reporting)                                | Yes                       |
| 9  |                                                                                                                                                                          | No                        |
| 10 | 99. Statistical Methods: Definition of subgroup categories provided? (reporting)                                                                                         | Yes                       |
| 11 |                                                                                                                                                                          | No                        |
| 12 |                                                                                                                                                                          | Not applicable            |
| 13 |                                                                                                                                                                          |                           |
| 14 | 100. Any subgroup analysis mentioned (this question triggers a set of questions for a subproject independent of SPIRIT)?                                                 | Yes                       |
| 15 |                                                                                                                                                                          | No                        |
| 16 | If yes, is it explicitly mentioned that subgroup analyses are exploratory?                                                                                               | Yes                       |
| 17 |                                                                                                                                                                          | No                        |
| 18 |                                                                                                                                                                          |                           |
| 19 | If yes, is a clear hypothesis for a subgroup effect pre-specified?                                                                                                       | Yes                       |
| 20 |                                                                                                                                                                          | No                        |
| 21 |                                                                                                                                                                          |                           |
| 22 | If yes, is a clear hypothesis with a direction of subgroup effect pre-specified?                                                                                         | Yes                       |
| 23 |                                                                                                                                                                          | No                        |
| 24 |                                                                                                                                                                          |                           |
| 25 | If yes, use of interaction test for subgroup analysis mentioned?                                                                                                         | Yes                       |
| 26 |                                                                                                                                                                          | No                        |
| 27 | If yes, please list planned subgroup variables                                                                                                                           |                           |
| 28 | If yes, please list planned outcomes for subgroup analyses                                                                                                               |                           |
| 29 |                                                                                                                                                                          |                           |
| 30 | If yes, please specify number of subgroup analyses planned (=SG variables x outcomes)                                                                                    |                           |
| 31 |                                                                                                                                                                          |                           |
| 32 | If yes, subgroup analysis considered in sample size calculation?                                                                                                         | Yes                       |
| 33 |                                                                                                                                                                          | No                        |
| 34 |                                                                                                                                                                          |                           |
| 35 | 101. Statistical Methods: Does the protocol define which participants will be included in the main analysis in terms of protocol adherence and missing data? (reporting) | Yes                       |
| 36 |                                                                                                                                                                          | No                        |
| 37 |                                                                                                                                                                          |                           |
| 38 | 102. Data Monitoring Committee: Is a data monitoring committee planned for this study?                                                                                   | Yes                       |
| 39 |                                                                                                                                                                          | No                        |
| 40 |                                                                                                                                                                          |                           |
| 41 | 103. Data Monitoring Committee: Is it explicitly reported whether a DMC is planned or why it is not planned? (reporting)                                                 | Yes                       |
| 42 |                                                                                                                                                                          | No                        |
| 43 |                                                                                                                                                                          |                           |
| 44 | 104. Data Monitoring: Planned number of interim analyses                                                                                                                 |                           |
| 45 | 105. Data Monitoring: Purpose of interim analyses (check all that apply)                                                                                                 | Benefit                   |
| 46 |                                                                                                                                                                          | Harm                      |
| 47 |                                                                                                                                                                          | Futility                  |
| 48 |                                                                                                                                                                          | Sample size recalculation |
| 49 |                                                                                                                                                                          | No reason provided        |
| 50 |                                                                                                                                                                          | Not applicable            |
| 51 |                                                                                                                                                                          | Other                     |
| 52 |                                                                                                                                                                          |                           |
| 53 | 106. Data Monitoring: Reported who has ultimate authority to stop the trial? (reporting)                                                                                 | Yes                       |
| 54 |                                                                                                                                                                          | No                        |
| 55 |                                                                                                                                                                          |                           |
| 56 | 107. Data Monitoring: Does the sponsor retain the right to stop the trial?                                                                                               | Yes                       |
| 57 |                                                                                                                                                                          | No                        |
| 58 |                                                                                                                                                                          | Not reported              |
| 59 |                                                                                                                                                                          |                           |
| 60 | If yes, explicitly at any time for any reason?                                                                                                                           | Yes                       |
|    |                                                                                                                                                                          | No                        |

|                                                                                                                                                                                                  |                                                                                                                                                                                                                                                                                                                                                                                                               |
|--------------------------------------------------------------------------------------------------------------------------------------------------------------------------------------------------|---------------------------------------------------------------------------------------------------------------------------------------------------------------------------------------------------------------------------------------------------------------------------------------------------------------------------------------------------------------------------------------------------------------|
| 108. Harms: Plans for collecting, assessing, reporting, managing anticipated/unanticipated adverse events provided? (reporting)                                                                  | Yes                                                                                                                                                                                                                                                                                                                                                                                                           |
|                                                                                                                                                                                                  | No                                                                                                                                                                                                                                                                                                                                                                                                            |
| 109. Auditing: Procedures of audits and/or external monitoring described (e.g. clinical trial unit/CROs)? (reporting)                                                                            | Yes                                                                                                                                                                                                                                                                                                                                                                                                           |
|                                                                                                                                                                                                  | No                                                                                                                                                                                                                                                                                                                                                                                                            |
|                                                                                                                                                                                                  | Not applicable                                                                                                                                                                                                                                                                                                                                                                                                |
| 110. Research Ethics Approval: Where approval has been obtained, or plans for seeking approval, provided? (should always be yes in this study) (reporting)                                       | Yes                                                                                                                                                                                                                                                                                                                                                                                                           |
|                                                                                                                                                                                                  | No                                                                                                                                                                                                                                                                                                                                                                                                            |
| 111. Protocol Amendments: Process for making amendments described? (reporting)                                                                                                                   | Yes                                                                                                                                                                                                                                                                                                                                                                                                           |
|                                                                                                                                                                                                  | No                                                                                                                                                                                                                                                                                                                                                                                                            |
| 112. Consent or Assent: Informed Consent process described? (reporting)                                                                                                                          | Yes                                                                                                                                                                                                                                                                                                                                                                                                           |
|                                                                                                                                                                                                  | No                                                                                                                                                                                                                                                                                                                                                                                                            |
| 113. Consent or Assent – Ancillary Studies: Process to obtain additional consent for collection and use of data and biological specimens described? (reporting)                                  | Yes                                                                                                                                                                                                                                                                                                                                                                                                           |
|                                                                                                                                                                                                  | No                                                                                                                                                                                                                                                                                                                                                                                                            |
|                                                                                                                                                                                                  | Not applicable                                                                                                                                                                                                                                                                                                                                                                                                |
| 114. Confidentiality: Described how data will be collected, kept secure, and maintained during the trial? (reporting)                                                                            | Yes                                                                                                                                                                                                                                                                                                                                                                                                           |
|                                                                                                                                                                                                  | No                                                                                                                                                                                                                                                                                                                                                                                                            |
| 115. Declaration of Interests: Financial and other competing interests clearly stated? (reporting)                                                                                               | Yes                                                                                                                                                                                                                                                                                                                                                                                                           |
|                                                                                                                                                                                                  | No                                                                                                                                                                                                                                                                                                                                                                                                            |
| 116. Access to data: Is it clearly mentioned who will have access to full dataset after trial completion? (reporting)                                                                            | Yes                                                                                                                                                                                                                                                                                                                                                                                                           |
|                                                                                                                                                                                                  | No                                                                                                                                                                                                                                                                                                                                                                                                            |
| 117. Ancillary and post-trial care: Any plans to provide or pay for ancillary care during the trial provided? (reporting)                                                                        | Yes                                                                                                                                                                                                                                                                                                                                                                                                           |
|                                                                                                                                                                                                  | No                                                                                                                                                                                                                                                                                                                                                                                                            |
| 118. Dissemination Policy: Plans to disseminate trial results to key stakeholders/publication provided? (reporting)                                                                              | Yes                                                                                                                                                                                                                                                                                                                                                                                                           |
|                                                                                                                                                                                                  | No                                                                                                                                                                                                                                                                                                                                                                                                            |
| 119. Dissemination Policy: Does the protocol mention any rules/regulations between the investigators and the sponsor with respect to the rights of publication of the trial results? (reporting) | Yes                                                                                                                                                                                                                                                                                                                                                                                                           |
|                                                                                                                                                                                                  | No                                                                                                                                                                                                                                                                                                                                                                                                            |
|                                                                                                                                                                                                  | Not applicable                                                                                                                                                                                                                                                                                                                                                                                                |
| If yes, please copy the corresponding statement from the protocol                                                                                                                                |                                                                                                                                                                                                                                                                                                                                                                                                               |
| If yes, which statement suits best?                                                                                                                                                              | <p>Only the sponsor retains the right to analyze and publish the data (no cooperation with investigators at all)</p> <p>The sponsor retains the right to approve any manuscript/abstract before publication (sponsor retains explicitly the right to reject submission for publication)</p> <p>The sponsor retains at least the right to review and comment on any manuscript/abstract before publication</p> |

|    |                                                                             |                                 |
|----|-----------------------------------------------------------------------------|---------------------------------|
| 1  |                                                                             |                                 |
| 2  |                                                                             |                                 |
| 3  |                                                                             |                                 |
| 4  |                                                                             |                                 |
| 5  |                                                                             | Free publication rights for the |
| 6  |                                                                             | investigators, no constraints   |
| 7  |                                                                             | at all by the sponsor (sponsor  |
| 8  |                                                                             | has explicitly NOT the right to |
| 9  |                                                                             | reject the submission for       |
| 10 |                                                                             | publication)                    |
| 11 |                                                                             |                                 |
| 12 |                                                                             | Protocol refers to a separate   |
| 13 |                                                                             | publication agreement           |
| 14 |                                                                             | between sponsor and             |
| 15 |                                                                             | investigator                    |
| 16 |                                                                             |                                 |
| 17 |                                                                             | Other (Please enter             |
| 18 |                                                                             | description for other)          |
| 19 | 120. Dissemination Policy: Authorship eligibility criteria described?       | Yes                             |
| 20 |                                                                             | No                              |
| 21 | 121. Dissemination Policy: Plans for granting access to full trial protocol | Yes                             |
| 22 | provided? (reporting)                                                       | No                              |
| 23 |                                                                             |                                 |
| 24 | 122. Informed Consent Materials: Model consent and/or assent forms provided | Yes                             |
| 25 | (e.g in Appendix)? (reporting)                                              | No                              |
| 26 |                                                                             |                                 |
| 27 | 123. Biological Specimens: Details of specimen collection provided?         | Yes                             |
| 28 | (reporting)                                                                 | No                              |
| 29 |                                                                             | Not applicable                  |
| 30 | 124. Any comments?                                                          |                                 |
| 31 |                                                                             |                                 |
| 32 |                                                                             |                                 |
| 33 |                                                                             |                                 |
| 34 |                                                                             |                                 |
| 35 |                                                                             |                                 |
| 36 |                                                                             |                                 |
| 37 |                                                                             |                                 |
| 38 |                                                                             |                                 |
| 39 |                                                                             |                                 |
| 40 |                                                                             |                                 |
| 41 |                                                                             |                                 |
| 42 |                                                                             |                                 |
| 43 |                                                                             |                                 |
| 44 |                                                                             |                                 |
| 45 |                                                                             |                                 |
| 46 |                                                                             |                                 |
| 47 |                                                                             |                                 |
| 48 |                                                                             |                                 |
| 49 |                                                                             |                                 |
| 50 |                                                                             |                                 |
| 51 |                                                                             |                                 |
| 52 |                                                                             |                                 |
| 53 |                                                                             |                                 |
| 54 |                                                                             |                                 |
| 55 |                                                                             |                                 |
| 56 |                                                                             |                                 |
| 57 |                                                                             |                                 |
| 58 |                                                                             |                                 |
| 59 |                                                                             |                                 |
| 60 |                                                                             |                                 |

**Supplementary Table 2: Adherence to SPIRIT items in RCT protocols by approval year and median target sample size, multicentre vs single centre trials, and with vs without CTU or CRO support.**

| Characteristic                          | 2012                          |              |                            |              | 2016                          |              |                            |              |
|-----------------------------------------|-------------------------------|--------------|----------------------------|--------------|-------------------------------|--------------|----------------------------|--------------|
|                                         | median (IQR)                  | mean (SD)    | median (IQR)               | mean (SD)    | median (IQR)                  | mean (SD)    | median (IQR)               | mean (SD)    |
|                                         | Sample size <= 220 (n=117)    |              | Sample size > 220 (n=140)  |              | Sample size <= 220 (n=158)    |              | Sample size > 220 (n=134)  |              |
| Frequency of items per protocol         | 21.75 (18.25, 24.79)          | 21.13 (4.85) | 24.92 (22.81, 26.42)       | 24.33 (2.98) | 25.04 (22.17, 27.06)          | 23.98 (4.38) | 25.33 (23.06, 27.06)       | 24.88 (3.21) |
| <b>Proportion of items per protocol</b> | 0.66 (0.55, 0.75)             | 0.64 (0.15)  | 0.76 (0.69, 0.80)          | 0.74 (0.09)  | 0.76 (0.67, 0.82)             | 0.73 (0.13)  | 0.77 (0.70, 0.82)          | 0.75 (0.10)  |
|                                         | Single centre trial (n=47)    |              | Multicentre trial (n=210)  |              | Single centre trial (n=77)    |              | Multicentre trial (n=215)  |              |
| Frequency of items per protocol         | 18.79 (16.00, 22.67)          | 19.04 (5.03) | 24.42 (21.75, 26.25)       | 23.73 (3.53) | 24.67 (20.00, 27.17)          | 23.09 (5.08) | 25.25 (23.29, 27.04)       | 24.87 (3.28) |
| <b>Proportion of items per protocol</b> | 0.57 (0.48, 0.69)             | 0.58 (0.15)  | 0.74 (0.66, 0.80)          | 0.72 (0.11)  | 0.75 (0.61, 0.82)             | 0.70 (0.15)  | 0.77 (0.71, 0.82)          | 0.75 (0.10)  |
|                                         | No CTU or CRO support (n=108) |              | CTU or CRO support (n=149) |              | No CTU or CRO support (n=130) |              | CTU or CRO support (n=162) |              |
| Frequency of items per protocol         | 21.71 (18.31, 24.19)          | 20.92 (4.71) | 24.92 (22.58, 26.42)       | 24.29 (3.22) | 24.08 (20.21, 26.25)          | 22.92 (4.33) | 26.12 (23.92, 27.65)       | 25.59 (3.05) |
| <b>Proportion of items per protocol</b> | 0.66 (0.55, 0.73)             | 0.63 (0.14)  | 0.76 (0.68, 0.80)          | 0.74 (0.10)  | 0.73 (0.61, 0.80)             | 0.69 (0.13)  | 0.79 (0.72, 0.84)          | 0.78 (0.09)  |

Abbreviations: SPIRIT, Standard Protocol Items: Recommendations for Interventional Trials; RCT, randomised clinical trial; CTU, clinical trials unit; CRO, contract research organization; IQR, interquartile range; SD, standard deviation

**Supplementary Table 3: Adherence to SPIRIT items in RCT protocols by country and sponsorship**

| Characteristic                   | 2012                 |              |                      |              |                      |              | 2016                 |              |                      |              |                      |              |
|----------------------------------|----------------------|--------------|----------------------|--------------|----------------------|--------------|----------------------|--------------|----------------------|--------------|----------------------|--------------|
|                                  | Sponsorship          |              |                      |              | Total 2012 (n=257)   |              | Sponsorship          |              |                      |              | Total 2016 (n=292)   |              |
|                                  | Industry (n=138)     |              | Investigator (n=119) |              |                      |              | Industry (n=130)     |              | Investigator (n=162) |              |                      |              |
|                                  | median (IQR)         | mean (SD)    |                      |              |
| <b>Switzerland</b>               | Industry (n=91)      |              | Investigator (n=89)  |              | Total 2012 (n=180)   |              | Industry (n=86)      |              | Investigator (n=131) |              | Total 2016 (n=217)   |              |
| Frequency of items per protocol  | 26.08 (24.71, 27.08) | 25.52 (2.71) | 21.42 (18.33, 24.25) | 20.99 (4.61) | 24.49 (21.15, 26.44) | 23.28 (4.39) | 25.98 (24.35, 27.08) | 25.25 (3.05) | 26.08 (22.50, 27.67) | 24.81 (4.02) | 26.04 (23.50, 27.33) | 24.98 (3.67) |
| Proportion of items per protocol | 0.79 (0.75, 0.82)    | 0.77 (0.08)  | 0.65 (0.56, 0.74)    | 0.64 (0.14)  | 0.74 (0.64, 0.80)    | 0.71 (0.13)  | 0.79 (0.74, 0.82)    | 0.77 (0.09)  | 0.79 (0.68, 0.84)    | 0.75 (0.12)  | 0.79 (0.71, 0.83)    | 0.76 (0.11)  |
| <b>Germany</b>                   | Industry (n=26)      |              | Investigator (n=11)  |              | Total 2012 (n=37)    |              | Industry (n=27)      |              | Investigator (n=11)  |              | Total 2016 (n=38)    |              |
| Frequency of items per protocol  | 24.58 (22.96, 25.75) | 24.36 (1.88) | 19.50 (17.17, 23.54) | 19.28 (5.14) | 24.17 (21.92, 25.08) | 22.85 (3.92) | 23.92 (22.38, 25.25) | 22.74 (4.21) | 22.42 (19.38, 24.63) | 22.07 (3.76) | 23.58 (21.09, 25.21) | 22.55 (4.04) |
| Proportion of items per protocol | 0.75 (0.70, 0.78)    | 0.74 (0.06)  | 0.59 (0.52, 0.71)    | 0.58 (0.16)  | 0.73 (0.66, 0.76)    | 0.69 (0.12)  | 0.73 (0.68, 0.77)    | 0.69 (0.13)  | 0.68 (0.59, 0.75)    | 0.67 (0.11)  | 0.72 (0.64, 0.76)    | 0.68 (0.12)  |
| <b>Canada</b>                    | Industry (n=21)      |              | Investigator (n=19)  |              | Total 2012 (n=40)    |              | Industry (n=17)      |              | Investigator (n=20)  |              | Total 2016 (n=37)    |              |
| Frequency of items per protocol  | 22.83 (21.42, 24.42) | 22.56 (2.70) | 19.42 (18.17, 22.29) | 19.48 (3.45) | 21.75 (19.22, 23.15) | 21.10 (3.41) | 25.92 (23.67, 27.08) | 25.37 (1.93) | 20.04 (17.98, 23.65) | 20.71 (4.45) | 23.67 (20.00, 26.00) | 22.85 (4.20) |
| Proportion of items per protocol | 0.69 (0.65, 0.74)    | 0.68 (0.08)  | 0.59 (0.55, 0.68)    | 0.59 (0.10)  | 0.66 (0.58, 0.70)    | 0.64 (0.10)  | 0.79 (0.72, 0.82)    | 0.77 (0.06)  | 0.61 (0.55, 0.72)    | 0.63 (0.14)  | 0.72 (0.61, 0.79)    | 0.69 (0.13)  |

1  
2  
3  
4  
5  
6  
7  
8  
9  
10  
11  
12  
13  
14  
15  
16  
17  
18  
19  
20  
21  
22  
23  
24  
25  
26  
27  
28  
29  
30  
31  
32  
33  
34  
35  
36  
37  
38  
39  
40  
41  
42  
43  
44  
45  
46

Abbreviations: SPIRIT, Standard Protocol Items: Recommendations for Interventional Trials; RCT, randomised clinical trial; IQR, interquartile range; SD, standard deviation

For peer review only

**Supplementary Table 4: Sensitivity analyses of calculating the adherence to SPIRIT items for RCT protocols by sponsorship**

| Characteristic                                                | 2012                       |              |                                |              |                      |              | 2016                       |              |                                |              |                      |              |
|---------------------------------------------------------------|----------------------------|--------------|--------------------------------|--------------|----------------------|--------------|----------------------------|--------------|--------------------------------|--------------|----------------------|--------------|
|                                                               | Industry-sponsored (n=138) |              | Investigator-sponsored (n=119) |              | Total 2012 (n=257)   |              | Industry-sponsored (n=130) |              | Investigator-sponsored (n=162) |              | Total 2016 (n=292)   |              |
|                                                               | median (IQR)               | mean (SD)    | median (IQR)                   | mean (SD)    | median (IQR)         | mean (SD)    | median (IQR)               | mean (SD)    | median (IQR)                   | mean (SD)    | median (IQR)         | mean (SD)    |
| <b>Major Item approach (simple) NA=0</b>                      |                            |              |                                |              |                      |              |                            |              |                                |              |                      |              |
| Frequency of items per protocol                               | 18.00 (17.00, 20.00)       | 18.04 (2.99) | 13.00 (11.00, 16.00)           | 13.48 (4.27) | 17.00 (13.00, 19.00) | 15.93 (4.29) | 18.00 (16.00, 20.00)       | 18.12 (3.44) | 17.00 (14.00, 19.00)           | 16.40 (4.08) | 18.00 (15.00, 20.00) | 17.16 (3.89) |
| Proportion of items per protocol                              | 0.56 (0.52, 0.61)          | 0.55 (0.09)  | 0.42 (0.33, 0.50)              | 0.41 (0.13)  | 0.52 (0.41, 0.58)    | 0.49 (0.13)  | 0.56 (0.50, 0.62)          | 0.56 (0.10)  | 0.53 (0.42, 0.59)              | 0.51 (0.12)  | 0.55 (0.47, 0.61)    | 0.53 (0.12)  |
| <b>Major Item approach (simple) NA=1</b>                      |                            |              |                                |              |                      |              |                            |              |                                |              |                      |              |
| Frequency of items per protocol                               | 22.00 (20.00, 23.00)       | 21.14 (3.20) | 16.00 (14.00, 19.00)           | 16.39 (4.76) | 20.00 (16.00, 22.00) | 18.95 (4.64) | 22.00 (20.00, 24.00)       | 21.25 (3.68) | 21.00 (17.00, 24.00)           | 20.19 (4.73) | 21.00 (18.00, 24.00) | 20.66 (4.32) |
| Proportion of items per protocol                              | 0.67 (0.61, 0.70)          | 0.64 (0.10)  | 0.48 (0.42, 0.58)              | 0.50 (0.14)  | 0.61 (0.48, 0.67)    | 0.57 (0.14)  | 0.67 (0.61, 0.73)          | 0.64 (0.11)  | 0.64 (0.52, 0.73)              | 0.61 (0.14)  | 0.64 (0.55, 0.73)    | 0.63 (0.13)  |
| <b>Major item approach (allowing for partial credit) NA=0</b> |                            |              |                                |              |                      |              |                            |              |                                |              |                      |              |
| Frequency of items per protocol                               | 24.75 (22.75, 26.17)       | 24.22 (2.86) | 19.47 (16.59, 22.27)           | 19.19 (4.91) | 22.87 (19.29, 25.42) | 21.88 (4.68) | 24.50 (22.40, 26.21)       | 23.89 (3.64) | 23.92 (19.85, 25.83)           | 22.72 (4.44) | 24.25 (21.25, 26.08) | 23.24 (4.14) |



|                                                               |                      |              |                      |              |                      |              |                      |              |                      |              |                      |              |
|---------------------------------------------------------------|----------------------|--------------|----------------------|--------------|----------------------|--------------|----------------------|--------------|----------------------|--------------|----------------------|--------------|
| Proportion of items per protocol                              | 0.76 (0.70, 0.80)    | 0.74 (0.08)  | 0.60 (0.51, 0.69)    | 0.59 (0.15)  | 0.71 (0.60, 0.78)    | 0.67 (0.14)  | 0.76 (0.69, 0.80)    | 0.73 (0.11)  | 0.74 (0.60, 0.80)    | 0.70 (0.14)  | 0.74 (0.66, 0.80)    | 0.72 (0.13)  |
| <b>Major item approach (allowing for partial credit) NA=1</b> |                      |              |                      |              |                      |              |                      |              |                      |              |                      |              |
| Frequency of items per protocol                               | 25.46 (23.58, 26.50) | 24.85 (2.77) | 21.25 (18.25, 23.67) | 20.59 (4.52) | 23.67 (20.67, 26.17) | 22.88 (4.25) | 25.33 (23.67, 26.91) | 24.75 (3.35) | 25.00 (21.24, 27.31) | 24.12 (4.29) | 25.25 (22.50, 27.08) | 24.40 (3.90) |
| Proportion of items per protocol                              | 0.77 (0.71, 0.80)    | 0.75 (0.08)  | 0.64 (0.55, 0.72)    | 0.62 (0.14)  | 0.72 (0.63, 0.79)    | 0.69 (0.13)  | 0.77 (0.72, 0.82)    | 0.75 (0.10)  | 0.76 (0.64, 0.83)    | 0.73 (0.13)  | 0.77 (0.68, 0.82)    | 0.74 (0.12)  |
| <b>All item approach NA=0</b>                                 |                      |              |                      |              |                      |              |                      |              |                      |              |                      |              |
| Frequency of items per protocol                               | 43.00 (40.25, 46.00) | 42.38 (5.26) | 35.00 (30.00, 40.00) | 34.57 (8.33) | 41.00 (35.00, 44.00) | 38.76 (7.87) | 42.00 (40.00, 45.75) | 41.65 (6.46) | 41.00 (35.00, 45.00) | 39.69 (7.91) | 42.00 (37.75, 45.00) | 40.57 (7.35) |
| Proportion of items per protocol                              | 0.73 (0.69, 0.78)    | 0.73 (0.08)  | 0.62 (0.53, 0.70)    | 0.60 (0.14)  | 0.70 (0.61, 0.76)    | 0.67 (0.13)  | 0.73 (0.68, 0.78)    | 0.71 (0.11)  | 0.73 (0.62, 0.79)    | 0.70 (0.13)  | 0.73 (0.65, 0.78)    | 0.71 (0.12)  |
| <b>All item approach NA=1</b>                                 |                      |              |                      |              |                      |              |                      |              |                      |              |                      |              |
| Frequency of items per protocol                               | 49.00 (46.00, 51.75) | 48.27 (4.71) | 43.00 (37.00, 46.00) | 41.42 (7.80) | 46.00 (42.00, 50.00) | 45.10 (7.18) | 48.50 (45.00, 51.00) | 47.45 (5.94) | 49.00 (42.25, 52.00) | 46.95 (7.42) | 49.00 (44.00, 52.00) | 47.17 (6.80) |
| Proportion of items per protocol                              | 0.77 (0.72, 0.81)    | 0.75 (0.07)  | 0.67 (0.58, 0.72)    | 0.65 (0.12)  | 0.72 (0.66, 0.78)    | 0.70 (0.11)  | 0.76 (0.70, 0.80)    | 0.74 (0.09)  | 0.77 (0.66, 0.81)    | 0.73 (0.12)  | 0.77 (0.69, 0.81)    | 0.74 (0.11)  |

Abbreviations: IQR, interquartile range; NA, not applicable (SPIRIT items with rating "not applicable"); SD, standard deviation

**Supplementary Table 5: Adherence to individual SPIRIT items by year and sponsorship**

| Variable                                                                     | Spirit Item Number | 2012                         |                                  |                    | 2016                         |                                  |                    |
|------------------------------------------------------------------------------|--------------------|------------------------------|----------------------------------|--------------------|------------------------------|----------------------------------|--------------------|
|                                                                              |                    | Industry sponsorship (n=138) | Investigator sponsorship (n=119) | Total 2012 (n=257) | Industry sponsorship (n=130) | Investigator sponsorship (n=162) | Total 2016 (n=292) |
| Basic study design in Title                                                  | 1                  | 116 (84.1%)                  | 47 (39.5%)                       | 163 (63.4%)        | 108 (83.1%)                  | 57 (35.2%)                       | 165 (56.5%)        |
| Trial registration                                                           | 2                  | 109 (79.0%)                  | 43 (36.1%)                       | 152 (59.1%)        | 111 (85.4%)                  | 125 (77.2%)                      | 236 (80.8%)        |
| Protocol version, number and date                                            | 3                  | 131 (94.9%)                  | 100 (84.0%)                      | 231 (89.9%)        | 127 (97.7%)                  | 155 (95.7%)                      | 282 (96.6%)        |
| Funding sources                                                              | 4                  | 123 (89.1%)                  | 70 (58.8%)                       | 193 (75.1%)        | 122 (93.8%)                  | 120 (74.1%)                      | 242 (82.9%)        |
| Names of protocol contributors/ authors                                      | 5a                 | 30 (21.7%)                   | 36 (30.3%)                       | 66 (25.7%)         | 20 (15.4%)                   | 30 (18.5%)                       | 50 (17.1%)         |
| Name and contact details of sponsor                                          | 5b                 | 110 (79.7%)                  | 82 (68.9%)                       | 192 (74.7%)        | 91 (70.0%)                   | 136 (84.0%)                      | 227 (77.7%)        |
| Role of sponsor and funder in trial                                          | 5c                 | 112 (81.2%)                  | 39 (32.8%)                       | 151 (58.8%)        | 70 (53.8%)                   | 43 (26.5%)                       | 113 (38.7%)        |
| Steering Committee General Membership and Role                               | 5d                 | 125 (90.6%)                  | 107 (89.9)                       | 232 (90.3%)        | 113 (86.9%)                  | 156 (96.3%)                      | 269 (92.1%)        |
| Of which Not Applicable                                                      |                    | 94 (75.2%)                   | 72 (67.3%)                       | 164 (71.6%)        | 90 (79.6%)                   | 109 (69.9%)                      | 199 (74.0%)        |
| Research question described and justified                                    | 6a                 | 25 (18.1%)                   | 31 (26.1%)                       | 56 (21.8%)         | 22 (16.9%)                   | 54 (33.3%)                       | 76 (26.0%)         |
| Comparator choice explained                                                  | 6b                 | 108 (78.3%)                  | 88 (73.9%)                       | 196 (76.3%)        | 105 (80.8%)                  | 137 (84.6%)                      | 242 (82.9%)        |
| Specific objectives described                                                | 7                  | 133 (96.4%)                  | 107 (89.9%)                      | 240 (93.4%)        | 125 (96.2%)                  | 149 (92.0%)                      | 274 (93.8%)        |
| Trial design described                                                       | 8                  | 127 (92.0%)                  | 80 (67.2%)                       | 207 (80.5%)        | 115 (88.5%)                  | 132 (81.5%)                      | 247 (84.6%)        |
| Countries where data will be collected listed                                | 9                  | 71 (51.4%)                   | 94 (79.0%)                       | 165 (64.2%)        | 19 (14.6%)                   | 144 (88.9%)                      | 163 (55.8%)        |
| Eligibility criteria for trial participants                                  | 10                 | 138 (100.0%)                 | 116 (97.5%)                      | 254 (98.8%)        | 130 (100.0%)                 | 162 (100.0%)                     | 292 (100.0%)       |
| Eligibility criteria for study centres and who will perform the intervention | 10                 | 15 (10.9%)                   | 58 (48.7%)                       | 73 (28.4%)         | 12 (9.2%)                    | 98 (60.5%)                       | 110 (37.7%)        |

|                                                        |     |              |             |             |             |             |             |
|--------------------------------------------------------|-----|--------------|-------------|-------------|-------------|-------------|-------------|
| Of which Not Applicable                                |     | 1 (6.7%)     | 39 (67.2%)  | 40 (54.8%)  | 2 (16.7%)   | 68 (69.4%)  | 70 (63.6%)  |
| Individuals administering interventions (non-drug)     | 10  | 131 (94.9%)  | 93 (78.2%)  | 224 (87.2%) | 120 (92.3%) | 131 (80.9%) | 251 (86.0%) |
| Of which Not Applicable                                |     | 119 (90.8%)  | 49 (52.7%)  | 168 (75.0%) | 106 (88.3%) | 65 (49.6%)  | 171 (68.1%) |
| Generic Name, Dose and Schedule of intervention        | 11a | 135 (97.8%)  | 118 (99.2%) | 253 (98.4%) | 130 (100%)  | 161 (99.4%) | 291 (99.7%) |
| Of which Not Applicable                                |     | 16 (11.9%)   | 63 (53.4%)  | 79 (31.2%)  | 19 (14.6%)  | 95 (59.0%)  | 114 (39.2%) |
| Setting of intervention administration                 | 11a | 129 (93.5%)  | 103 (86.6%) | 232 (90.3%) | 118 (90.8%) | 147 (90.7%) | 265 (90.8%) |
| Of which Not Applicable                                |     | 118 (91.5%)  | 49 (47.6%)  | 167 (72.0%) | 106 (89.8%) | 62 (42.2%)  | 168 (63.4%) |
| Criteria for modifications of interventions            | 11b | 114 (82.6%)  | 85 (71.4%)  | 199 (77.4%) | 111 (85.4%) | 128 (79.0%) | 239 (81.8%) |
| Of which Not Applicable                                |     | 13 (11.4%)   | 32 (37.7%)  | 45 (22.6%)  | 10 (9.0%)   | 35 (27.3%)  | 45 (18.8%)  |
| Strategies to improve or monitoring of adherence       | 11c | 123 (89.1%)  | 95 (79.8%)  | 218 (84.8%) | 107 (82.3%) | 144 (88.9%) | 251 (86.0%) |
| Of which Not Applicable                                |     | 44 (35.8%)   | 66 (69.5%)  | 110 (50.5%) | 33 (30.8%)  | 78 (54.2%)  | 111 (44.2%) |
| Permitted concomitant care                             | 11d | 130 (94.2%)  | 61 (51.3%)  | 191 (74.3%) | 124 (95.4%) | 112 (69.1%) | 236 (80.8%) |
| Primary Outcome: Specific measurement variable         | 12  | 138 (100%)   | 113 (95.0%) | 251 (97.7%) | 129 (99.2%) | 153 (94.4%) | 282 (96.6%) |
| Of which Not Applicable                                |     | 1 (0.7%)     | 0 (0%)      | 1 (0.4%)    | 0 (0%)      | 0 (0%)      | 0 (0%)      |
| Primary Outcome: Analysis metric                       | 12  | 132 (95.7%)  | 101 (84.9%) | 233 (90.7%) | 124 (95.4%) | 140 (86.4%) | 264 (90.4%) |
| Of which Not Applicable                                |     | 3 (2.3%)     | 0 (0%)      | 3 (1.3%)    | 1 (0.8%)    | 0 (0%)      | 1 (0.4%)    |
| Primary Outcomes: time point of measurement            | 12  | 132 (95.7%)  | 105 (88.2%) | 237 (92.2%) | 124 (95.4%) | 149 (92.0%) | 273 (93.5%) |
| Of which Not Applicable                                |     | 40 (30.3%)   | 20 (19.1%)  | 60 (25.3%)  | 26 (21.0%)  | 20 (13.4%)  | 46 (16.9%)  |
| Participant timeline                                   | 13  | 136 (98.6%)  | 113 (95.0%) | 249 (96.9%) | 130 (100%)  | 154 (95.1%) | 284 (97.3%) |
| Sample size: Estimated number                          | 14  | 138 (100.0%) | 116 (97.5%) | 254 (98.8%) | 128 (98.5%) | 161 (99.4%) | 289 (99.0%) |
| Sample size: Outcome used for samples size calculation | 14  | 135 (97.8%)  | 107 (89.9%) | 242 (94.2%) | 127 (97.7%) | 148 (91.4%) | 275 (94.2%) |
| Of which Not Applicable                                |     | 7 (5.2%)     | 3 (2.8%)    | 10 (4.1%)   | 4 (3.2%)    | 7 (4.7%)    | 11 (4.0%)   |

|                                                                       |     |             |             |             |             |             |             |
|-----------------------------------------------------------------------|-----|-------------|-------------|-------------|-------------|-------------|-------------|
| Sample size:<br>Assumed values for outcome                            | 14  | 122 (88.4%) | 89 (74.8%)  | 211 (82.1%) | 111 (85.4%) | 116 (71.6%) | 227 (77.7%) |
| Of which Not Applicable                                               |     | 6 (4.9%)    | 5 (5.6%)    | 11 (5.2%)   | 4 (3.6%)    | 7 (6.0%)    | 11 (4.9%)   |
| Sample size:<br>Alpha value                                           | 14  | 131 (94.9%) | 106 (89.1%) | 237 (92.2%) | 126 (96.9%) | 150 (92.6%) | 276 (94.5%) |
| Of which Not Applicable                                               |     | 7 (5.3%)    | 3 (2.8%)    | 10 (4.2%)   | 4 (3.2%)    | 7 (4.7%)    | 11 (4.0%)   |
| Sample size:<br>Statistical Power                                     | 14  | 134 (97.1%) | 111 (93.3%) | 245 (95.3%) | 128 (98.5%) | 153 (94.4%) | 281 (96.2%) |
| Of which Not Applicable                                               |     | 7 (5.2%)    | 3 (2.7%)    | 10 (4.1%)   | 4 (3.1%)    | 7 (4.6%)    | 11 (3.9%)   |
| Sample size:<br>Rationale sample size if not derived<br>statistically | 14  | 137 (99.3%) | 110 (92.4%) | 247 (96.1%) | 127 (97.7%) | 158 (97.5%) | 285 (97.6%) |
| Of which Not Applicable                                               |     | 130 (94.9%) | 110 (100%)  | 240 (97.2%) | 123 (96.9%) | 155 98.1%   | 278 (97.5%) |
| Location of<br>participant recruitment                                | 15  | 24 (17.4%)  | 78 (65.5%)  | 102 (39.7%) | 17 (13.1%)  | 112 (69.1%) | 129 (44.2%) |
| Person(s) who<br>will recruit participants                            | 15  | 40 (29.0%)  | 52 (43.7%)  | 92 (35.8%)  | 33 (25.4%)  | 91 (56.2%)  | 124 (42.5%) |
| Expected recruitment rate                                             | 15  | 37 (26.8%)  | 52 (43.7%)  | 89 (34.6%)  | 13 (10.0%)  | 39 (24.1%)  | 52 (17.8%)  |
| Method for generation<br>of random sequence                           | 16a | 89 (64.5%)  | 63 (52.9%)  | 152 (59.1%) | 68 (52.3%)  | 109 (67.3%) | 177 (60.6%) |
| Allocation concealment<br>mechanism                                   | 16b | 126 (91.3%) | 80 (67.2%)  | 206 (80.2%) | 113 (86.9%) | 130 (80.2%) | 243 (83.2%) |
| Of which Not Applicable                                               |     | 8 (6.4%)    | 3 (3.8%)    | 11 (5.3%)   | 1 (0.9%)    | 3 (2.3%)    | 4 (1.7%)    |
| Person who will<br>enroll/assign participants                         | 16c | 59 (42.8%)  | 44 (37.0%)  | 103 (40.1%) | 50 (38.5%)  | 79 (48.8%)  | 129 (44.2%) |
| Of which Not Applicable                                               |     | 0 (0%)      | 2 (4.6%)    | 2 (1.9%)    | 1 (2%)      | 1 (1.3%)    | 2 (1.6%)    |
| Blinding status<br>of participants                                    | 17a | 133 (96.4%) | 97 (81.5%)  | 230 (89.5%) | 128 (98.5%) | 148 (91.4%) | 276 (94.5%) |
| Blinding status<br>of care providers                                  | 17a | 134 (97.1%) | 97 (81.5%)  | 231 (89.9%) | 127 (97.7%) | 148 (91.4%) | 275 (94.2%) |
| Blinding status<br>of outcome assessors                               | 17a | 103 (74.6%) | 71 (59.7%)  | 174 (67.7%) | 94 (72.3%)  | 105 (64.8%) | 199 (68.2%) |
| Conditions when<br>unblinding is permissible                          | 17b | 127 (92.0%) | 92 (77.3%)  | 219 (85.2%) | 120 (82.3%) | 142 (87.7%) | 262 (89.7%) |
| Of which Not Applicable                                               |     | 34 (26.8%)  | 66 (71.7%)  | 100 (45.7%) | 36 (30%)    | 91 (64.1%)  | 127 (48.5%) |

|                                                                                              |     |             |             |             |             |             |             |
|----------------------------------------------------------------------------------------------|-----|-------------|-------------|-------------|-------------|-------------|-------------|
| Personnel who will collect data                                                              | 18a | 58 (42.0%)  | 52 (43.7%)  | 110 (42.8%) | 61 (46.9%)  | 96 (59.3%)  | 157 (53.8%) |
| Strategies to promote participant retention and complete follow-up                           | 18b | 84 (60.9%)  | 34 (28.6%)  | 118 (45.9%) | 80 (61.5%)  | 64 (39.5%)  | 144 (49.3%) |
| Data entry and coding                                                                        | 19  | 106 (76.8%) | 64 (53.8%)  | 170 (66.1%) | 102 (78.5%) | 117 (72.2%) | 219 (75.0%) |
| Main analysis for primary outcome                                                            | 20a | 131 (94.9%) | 96 (80.7%)  | 227 (88.3%) | 121 (93.1%) | 132 (81.5%) | 253 (86.6%) |
| Definition of subgroup categories                                                            | 20b | 117 (84.8%) | 98 (82.4%)  | 215 (83.7%) | 108 (83.1%) | 148 (91.4%) | 256 (87.7%) |
| Of which Not Applicable                                                                      |     | 60 (51.3%)  | 79 (80.6%)  | 139 (64.7%) | 63 (58.3%)  | 116 (78.4%) | 179 (69.9%) |
| Definition of analysis population                                                            | 20c | 125 (90.6%) | 49 (41.2%)  | 174 (67.7%) | 120 (92.3%) | 96 (59.3%)  | 216 (74.0%) |
| DMC is planned or why it is not planned                                                      | 21a | 102 (73.9%) | 49 (41.2%)  | 151 (58.8%) | 97 (74.6%)  | 72 (44.4%)  | 169 (57.9%) |
| Who has authority to stop the trial                                                          | 21b | 111 (80.4%) | 73 (61.3%)  | 184 (71.6%) | 111 (85.4%) | 112 (69.1%) | 223 (76.4%) |
| Anticipated/unanticipated adverse events collection                                          | 22  | 136 (98.6%) | 91 (76.5%)  | 227 (88.3%) | 127 (97.7%) | 138 (85.2%) | 265 (90.8%) |
| Audits/external monitoring described                                                         | 23  | 106 (76.8%) | 49 (41.2%)  | 155 (60.3%) | 109 (83.8%) | 112 (69.1%) | 221 (75.7%) |
| Of which Not Applicable                                                                      |     | 0 (0%)      | 3 (6.1%)    | 3 (1.9%)    | 3 (2.8%)    | 15 (13.4%)  | 18 (8.2%)   |
| Research ethics approval                                                                     | 24  | 138 (100%)  | 118 (100%)  | 256 (100%)  | 130 (100%)  | 162 (100%)  | 292 (100%)  |
| Process for making amendments described                                                      | 25  | 106 (76.8%) | 48 (40.3%)  | 154 (59.9%) | 103 (79.2%) | 121 (74.7%) | 224 (76.7%) |
| Informed Consent process described                                                           | 26a | 119 (86.2%) | 77 (64.7%)  | 196 (76.3%) | 110 (84.6%) | 139 (85.8%) | 249 (85.3%) |
| Process to obtain additional consent for collection and use of data and biological specimens | 26b | 123 (89.1%) | 103 (86.6%) | 226 (87.9%) | 111 (85.4%) | 151 (93.2%) | 262 (89.7%) |
| Of which Not Applicable                                                                      |     | 70 (56.9%)  | 87 (84.5%)  | 157 (69.5%) | 65 (58.6%)  | 126 (83.4%) | 191 (72.9%) |
| Confidentiality of data                                                                      | 27  | 125 (90.6%) | 88 (73.9%)  | 213 (82.9%) | 114 (87.7%) | 144 (88.9%) | 258 (88.4%) |
| Declaration of Interests                                                                     | 28  | 54 (39.1%)  | 27 (22.7%)  | 81 (31.5%)  | 94 (72.3%)  | 88 (54.3%)  | 182 (62.3%) |
| Who will have access to full dataset                                                         | 29  | 29 (21.0%)  | 23 (19.3%)  | 52 (20.2%)  | 37 (28.5%)  | 56 (34.6%)  | 93 (31.8%)  |

|                                                                             |     |             |             |             |             |             |             |
|-----------------------------------------------------------------------------|-----|-------------|-------------|-------------|-------------|-------------|-------------|
| Ancillary and post-trial care                                               | 30  | 61 (44.2%)  | 39 (32.8%)  | 100 (38.9%) | 50 (38.5%)  | 44 (27.2%)  | 94 (32.2%)  |
| Plans to disseminate trial results to key stakeholders/publication provided | 31a | 72 (52.2%)  | 51 (42.9%)  | 123 (47.9%) | 77 (59.2%)  | 129 (79.6%) | 206 (70.5%) |
| Authorship eligibility criteria                                             | 31b | 50 (36.2%)  | 30 (25.2%)  | 80 (31.1%)  | 41 (31.5%)  | 57 (35.2%)  | 98 (33.6%)  |
| Plans for granting access to full trial protocol                            | 31c | 7 (5.1%)    | 2 (1.7%)    | 9 (3.5%)    | 4 (3.1%)    | 13 (8.0%)   | 17 (5.8%)   |
| Consent forms provided                                                      | 32  | 133 (96.4%) | 118 (99.2%) | 251 (97.7%) | 125 (96.2%) | 157 (96.9%) | 282 (96.6%) |
| Details of specimen collection                                              | 33  | 126 (91.3%) | 99 (83.2)   | 225 (87.5%) | 120 (92.3%) | 152 (93.8%) | 272 (93.2%) |
| Of which Not Applicable                                                     |     | 35 (27.8%)  | 61 (61.6%)  | 96 (42.7%)  | 53 (44.2%)  | 109 (71.7%) | 162 (59.6%) |

**Supplementary Table 6: Adherence to SPIRIT items in Investigator-sponsored protocols that improved by 10% or more**

|                                                                              |                    | 2012        | 2016        |
|------------------------------------------------------------------------------|--------------------|-------------|-------------|
| Variable                                                                     | Spirit Item Number | Yes         | Yes         |
| Trial registration                                                           | 2                  | 43 (36.1%)  | 125 (77.2%) |
| Protocol version, number and date                                            | 3                  | 100 (84.0%) | 155 (95.7%) |
| Funding sources                                                              | 4                  | 70 (58.8%)  | 120 (74.1%) |
| Name and contact details of sponsor                                          | 5b                 | 82 (68.9%)  | 136 (84.0%) |
| Comparator choice explained                                                  | 6b                 | 88 (73.9%)  | 137 (84.6%) |
| Trial design described                                                       | 8                  | 80 (67.2%)  | 132 (81.5%) |
| Eligibility criteria for study centres and who will perform the intervention | 10                 | 58 (48.7%)  | 98 (60.5%)  |
| Of which Not Applicable                                                      |                    | 39 (67.2%)  | 68 (69.4%)  |
| Permitted concomitant care                                                   | 11d                | 61 (51.3%)  | 112 (69.1%) |
| Person(s) who will recruit participants                                      | 15                 | 52 (43.7%)  | 91 (56.2%)  |
| Method for generation of random sequence                                     | 16a                | 63 (52.9%)  | 109 (67.3%) |
| Allocation concealment mechanism                                             | 16b                | 80 (67.2%)  | 130 (80.3%) |
| Of which Not Applicable                                                      |                    | 3 (3.8%)    | 3 (2.3%)    |
| Person who will enroll/assign participants                                   | 16c                | 44 (37.0%)  | 79 (48.8%)  |
| Of which Not Applicable                                                      |                    | 2 (1.4%)    | 1 (1.3%)    |
| Personnel who will collect data                                              | 18a                | 52 (43.7%)  | 96 (59.3%)  |
| Strategies to promote participant retention and complete follow-up           | 18b                | 34 (28.6%)  | 64 (39.5%)  |
| Data entry and coding                                                        | 19                 | 64 (53.8%)  | 117 (72.2%) |
| Definition of analysis population                                            | 20c                | 49 (41.2%)  | 96 (59.3%)  |
| Audits/external monitoring described                                         | 23                 | 49 (41.2%)  | 112 (69.1%) |
| Of which Not Applicable                                                      |                    | 3 (6.1%)    | 15 (13.4%)  |
| Process for making amendments described                                      | 25                 | 48 (40.3%)  | 121 (74.7%) |
| Informed Consent process described                                           | 26a                | 77 (64.7%)  | 139 (85.8%) |
| Confidentiality of data                                                      | 27                 | 88 (73.9%)  | 144 (88.9%) |
| Declaration of Interests                                                     | 28                 | 27 (22.7%)  | 88 (54.3%)  |
| Who will have access to full dataset                                         | 29                 | 23 (19.3%)  | 56 (34.6%)  |
| Plans to disseminate trial results to key stakeholders/publication provided  | 31a                | 51 (42.9%)  | 129 (79.6%) |

|                                 |            |            |             |
|---------------------------------|------------|------------|-------------|
| Authorship eligibility criteria | 31b        | 30 (25.2%) | 57 (35.2%)  |
| Details of specimen collection  | 33         | 99 (83.2%) | 152 (93.8)  |
| Of which Not Applicable         | 61 (61.6%) |            | 109 (71.7%) |

For peer review only



**Supplementary Table 7: Results from multivariable Beta and Logistic regressions for all approaches**

| Approach                          | Independent Variable             | Beta Regression              |            |            | Likelihood ratio |       | Logistic regression with Protocol as random effect |             |             | Likelihood ratio |       |
|-----------------------------------|----------------------------------|------------------------------|------------|------------|------------------|-------|----------------------------------------------------|-------------|-------------|------------------|-------|
|                                   |                                  | Odds Ratio                   | CI         | p value    | Chisq            | p     | Odds Ratio                                         | CI          | p value     | Chisq            | p     |
| Major Item approach (simple) NA=0 | Sample size in 1000 increments   | 1.01                         | 0.99- 1.03 | 0.235      | -                | -     | 1.00                                               | 0.98 – 1.02 | 0.747       | -                | -     |
|                                   | Multicentre study                | 1.29                         | 1.17- 1.43 | <.001      | -                | -     | 1.21                                               | 1.08 – 1.36 | 0.001       | -                | -     |
|                                   | CTU or CRO support               | 1.35                         | 1.25- 1.45 | <.001      | -                | -     | 1.42                                               | 1.29 – 1.56 | <.001       | -                | -     |
|                                   | Industry sponsorship             | 1.23                         | 1.14- 1.34 | <.001      | -                | -     | 1.36                                               | 1.23 – 1.51 | <.001       | -                | -     |
|                                   | Year 2016                        | 1.25                         | 1.16- 1.35 | <.001      | -                | -     | 1.26                                               | 1.15 – 1.38 | <.001       | -                | -     |
|                                   | Interaction term                 | Sponsorship:Year interaction | 0.71       | 0.61- 0.81 | <.001            | 22.24 | <.001                                              | 0.69        | 0.58 – 0.83 | <.001            | 16.21 |
|                                   | CTU/CRO support:Year interaction | 0.91                         | 0.78- 1.05 | 0.190      | 1.72             | 0.190 | 0.87                                               | 0.73 – 1.04 | 0.118       | 2.43             | 0.119 |
| Major Item approach (simple) NA=1 | Sample size in 1000 increments   | 1.01                         | 0.99- 1.03 | 0.233      | -                | -     | 0.99                                               | 0.97 – 1.02 | 0.654       | -                | -     |
|                                   | Multicentre study                | 1.22                         | 1.08- 1.37 | 0.001      | -                | -     | 1.16                                               | 1.02 – 1.31 | 0.022       | -                | -     |
|                                   | CTU or CRO support               | 1.42                         | 1.30- 1.55 | <.001      | -                | -     | 1.46                                               | 1.32 – 1.60 | <.001       | -                | -     |
|                                   | Industry sponsorship             | 1.23                         | 1.11- 1.35 | <.001      | -                | -     | 1.34                                               | 1.21 – 1.50 | <.001       | -                | -     |
|                                   | Year 2016                        | 1.32                         | 1.21- 1.43 | <.001      | -                | -     | 1.34                                               | 1.22 – 1.48 | <.001       | -                | -     |
|                                   | Interaction term                 | Sponsorship:Year interaction | 0.64       | 0.55- 0.76 | <.001            | 26.27 | <.001                                              | 0.67        | 0.55 – 0.81 | <.001            | 17.32 |
|                                   | CTU/CRO support:Year interaction | 0.99                         | 0.83- 1.17 | 0.881      | 0.02             | 0.881 | 0.90                                               | 0.75 – 1.09 | 0.292       | 1.10             | 0.294 |

|                                                        |                                  |      |            |       |       |       |      |             |       |       |       |
|--------------------------------------------------------|----------------------------------|------|------------|-------|-------|-------|------|-------------|-------|-------|-------|
| Major item approach (allowing for partial credit) NA=0 | Sample size in 1000 increments   | 1.01 | 0.99- 1.03 | 0.290 | -     | -     | -    | -           | -     | -     | -     |
| Interaction term                                       | Multicentre study                | 1.22 | 1.08- 1.38 | 0.001 | -     | -     | -    | -           | -     | -     | -     |
|                                                        | CTU or CRO support               | 1.43 | 1.31- 1.57 | <.001 | -     | -     | -    | -           | -     | -     | -     |
|                                                        | Industry sponsorship             | 1.25 | 1.13- 1.38 | <.001 | -     | -     | -    | -           | -     | -     | -     |
|                                                        | Year 2016                        | 1.33 | 1.21- 1.46 | <.001 | -     | -     | -    | -           | -     | -     | -     |
|                                                        | Sponsorship:Year interaction     | 0.60 | 0.50- 0.71 | <.001 | 31.48 | <.001 | -    | -           | -     | -     | -     |
|                                                        | CTU/CRO support:Year interaction | 0.94 | 0.79- 1.13 | 0.515 | 0.42  | 0.515 | -    | -           | -     | -     | -     |
| Major item approach (allowing for partial credit) NA=1 | Sample size in 1000 increments   | 1.01 | 0.99- 1.03 | 0.389 | -     | -     | -    | -           | -     | -     | -     |
| Interaction term                                       | Multicentre study                | 1.18 | 1.05- 1.33 | 0.006 | -     | -     | -    | -           | -     | -     | -     |
|                                                        | CTU or CRO support               | 1.44 | 1.31- 1.57 | <.001 | -     | -     | -    | -           | -     | -     | -     |
|                                                        | Industry sponsorship             | 1.20 | 1.09- 1.33 | <.001 | -     | -     | -    | -           | -     | -     | -     |
|                                                        | Year 2016                        | 1.33 | 1.22- 1.45 | <.001 | -     | -     | -    | -           | -     | -     | -     |
|                                                        | Sponsorship:Year interaction     | 0.61 | 0.52- 0.73 | <.001 | 30.01 | <.001 | -    | -           | -     | -     | -     |
|                                                        | CTU/CRO support:Year interaction | 0.98 | 0.82- 1.16 | 0.790 | 0.07  | 0.790 | -    | -           | -     | -     | -     |
| All item approach NA=0                                 | Sample size in 1000 increments   | 1.02 | 1.00- 1.04 | 0.095 | -     | -     | 1.02 | 1.00 – 1.04 | 0.027 | -     | -     |
| Interaction term                                       | Multicentre study                | 1.27 | 1.14- 1.43 | <.001 | -     | -     | 1.37 | 1.24 – 1.52 | <.001 | -     | -     |
|                                                        | CTU or CRO support               | 1.39 | 1.28- 1.52 | <.001 | -     | -     | 1.33 | 1.23 – 1.44 | <.001 | -     | -     |
|                                                        | Industry sponsorship             | 1.14 | 1.03- 1.25 | 0.010 | -     | -     | 1.15 | 1.05 – 1.25 | 0.001 | -     | -     |
|                                                        | Year 2016                        | 1.25 | 1.15- 1.36 | <.001 | -     | -     | 1.20 | 1.11 – 1.29 | <.001 | -     | -     |
|                                                        | Sponsorship:Year interaction     | 0.63 | 0.53- 0.74 | <.001 | 29.29 | <.001 | 0.69 | 0.59 – 0.80 | <.001 | 24.20 | <.001 |

|                        |                                  |      |            |       |       |       |      |            |       |       |       |
|------------------------|----------------------------------|------|------------|-------|-------|-------|------|------------|-------|-------|-------|
|                        | CTU/CRO support:Year interaction | 1.02 | 0.86- 1.21 | 0.841 | 0.04  | 0.842 | 0.97 | 0.83 – 1.1 | 0.643 | 0.22  | 0.643 |
|                        |                                  |      |            |       |       |       |      | 2          |       |       |       |
| All item approach NA=1 | Sample size in 1000 increments   | 1.02 | 1.00- 1.04 | 0.131 | -     | -     | 1.02 | 1.00 – 1.0 | 0.118 | -     | -     |
|                        |                                  |      |            |       |       |       |      | 4          |       |       |       |
|                        | Multicentre study                | 1.18 | 1.06- 1.31 | 0.003 | -     | -     | 1.20 | 1.07 – 1.3 | 0.002 | -     | -     |
|                        |                                  |      |            |       |       |       |      | 5          |       |       |       |
|                        | CTU or CRO support               | 1.36 | 1.26- 1.48 | <.001 | -     | -     | 1.39 | 1.27 – 1.5 | <.001 | -     | -     |
|                        |                                  |      |            |       |       |       |      | 1          |       |       |       |
|                        | Industry sponsorship             | 1.13 | 1.03- 1.23 | 0.010 | -     | -     | 1.14 | 1.04 – 1.2 | 0.006 | -     | -     |
|                        |                                  |      |            |       |       |       |      | 5          |       |       |       |
|                        | Year 2016                        | 1.23 | 1.14- 1.34 | <.001 | -     | -     | 1.23 | 1.14 – 1.3 | <.001 | -     | -     |
|                        |                                  |      |            |       |       |       |      | 4          |       |       |       |
| Interaction term       | Sponsorship:Year interaction     | 0.64 | 0.55- 0.75 | <.001 | 31.18 | <.001 | 0.63 | 0.54 – 0.7 | <.001 | 30.67 | <.001 |
|                        |                                  |      |            |       |       |       |      | 4          |       |       | 1     |
|                        | CTU/CRO support:Year interaction | 1.05 | 0.90- 1.23 | 0.564 | 0.33  | 0.564 | 1.05 | 0.89 – 1.2 | 0.594 | 0.28  | 0.594 |
|                        |                                  |      |            |       |       |       |      | 4          |       |       |       |

Abbreviations: CI, confidence interval

**Supplementary Table 8: Results from multivariable Beta regression, subset of Investigator-sponsored protocols**

| Approach                                                     | Independent Variable | Beta Regression      |            |            | Likelihood ratio |       |       |
|--------------------------------------------------------------|----------------------|----------------------|------------|------------|------------------|-------|-------|
|                                                              |                      | Odds Ratio           | CI         | p value    | Chisq            | p     |       |
| Major item approach<br>(allowing for partial credit)<br>NA=0 | Sample size/1000     | 1.01                 | 0.95- 1.07 | 0.803      | -                | -     |       |
|                                                              | Multicentre          | 1.21                 | 1.05- 1.40 | 0.008      | -                | -     |       |
|                                                              | CTU or CRO support   | 1.55                 | 1.35- 1.77 | <.001      | -                | -     |       |
|                                                              | Year                 | 1.61                 | 1.42- 1.84 | <.001      | -                | -     |       |
|                                                              | Swiss cohort         | 1.48                 | 1.27- 1.74 | <.001      | -                | -     |       |
|                                                              | Interaction term     | CTU/CRO support:Year | 1.02       | 0.79- 1.33 | 0.869            | 0.03  | 0.869 |
|                                                              | Swiss trials:Year    | 1.39                 | 1.03- 1.88 | 0.034      | 4.42             | 0.036 |       |
| Major item approach<br>(allowing for partial credit)<br>NA=1 | Sample size/1000     | 1.00                 | 0.95- 1.06 | 0.891      | -                | -     |       |
|                                                              | Multicentre          | 1.19                 | 1.03- 1.37 | 0.016      | -                | -     |       |
|                                                              | CTU or CRO support   | 1.53                 | 1.34- 1.75 | <.001      | -                | -     |       |
|                                                              | Year                 | 1.60                 | 1.41- 1.82 | <.001      | -                | -     |       |
|                                                              | Swiss cohort         | 1.46                 | 1.25- 1.70 | <.001      | -                | -     |       |
|                                                              | Interaction term     | CTU/CRO support:Year | 1.08       | 0.83- 1.39 | 0.568            | 0.33  | 0.568 |
|                                                              | Swiss trials:Year    | 1.39                 | 1.03- 1.87 | 0.031      | 4.57             | 0.032 |       |

Abbreviations: CI, confidence interval

**Supplementary Table 9: Medical disciplines of included RCTs**

| Medical disciplines      | 2012             |                      |               | 2016                     |                      |               |            |
|--------------------------|------------------|----------------------|---------------|--------------------------|----------------------|---------------|------------|
|                          | Sponsorship      |                      |               | Sponsorship              |                      |               |            |
|                          | Industry (N=138) | Investigator (N=119) | Total (N=257) | Industry (N=130)         | Investigator (N=162) | Total (N=292) |            |
| Oncology                 | 30 (21.7%)       | 20 (16.8%)           | 50 (19.5%)    | Oncology                 | 30 (23.1%)           | 24 (14.8%)    | 54 (18.5%) |
| Surgery                  | 11 (8.0%)        | 27 (22.7%)           | 38 (14.8%)    | Cardiovascular           | 22 (16.9%)           | 14 (8.6%)     | 36 (12.3%) |
| Cardiovascular           | 19 (13.8%)       | 10 (8.4%)            | 29 (11.3%)    | Surgery                  | 6 (4.6%)             | 25 (15.4%)    | 31 (10.6%) |
| Neurology                | 15 (10.9%)       | 5 (4.2%)             | 20 (7.8%)     | Neurology                | 11 (8.5%)            | 12 (7.4%)     | 23 (7.9%)  |
| Respiratory              | 8 (5.8%)         | 6 (5.0%)             | 14 (5.4%)     | Psychiatry               | 1 (0.8%)             | 20 (12.3%)    | 21 (7.2%)  |
| Hematology               | 6 (4.3%)         | 6 (5.0%)             | 12 (4.7%)     | Respiratory              | 9 (6.9%)             | 7 (4.3%)      | 16 (5.5%)  |
| Infectious Disease       | 7 (5.1%)         | 4 (3.4%)             | 11 (4.3%)     | Gastroenterology         | 13 (10.0%)           | 1 (0.6%)      | 14 (4.8%)  |
| Anaesthetics             | 1 (0.7%)         | 9 (7.6%)             | 10 (3.9%)     | Rheumatology             | 12 (9.2%)            | 1 (0.6%)      | 13 (4.5%)  |
| Gastroenterology         | 8 (5.8%)         | 2 (1.7%)             | 10 (3.9%)     | Anaesthetics             | 0 (0.0%)             | 11 (6.8%)     | 11 (3.8%)  |
| Rheumatology             | 9 (6.5%)         | 1 (0.8%)             | 10 (3.9%)     | Endocrinology            | 5 (3.8%)             | 5 (3.1%)      | 10 (3.4%)  |
| Dermatology              | 8 (5.8%)         | 0 (0.0%)             | 8 (3.1%)      | Dentistry                | 1 (0.8%)             | 6 (3.7%)      | 7 (2.4%)   |
| Endocrinology            | 1 (0.7%)         | 5 (4.2%)             | 6 (2.3%)      | Infectious Disease       | 4 (3.1%)             | 3 (1.9%)      | 7 (2.4%)   |
| Obsterics and Gynecology | 1 (0.7%)         | 5 (4.2%)             | 6 (2.3%)      | Intensive care           | 0 (0.0%)             | 7 (4.3%)      | 7 (2.4%)   |
| Ophthalmology            | 6 (4.3%)         | 0 (0.0%)             | 6 (2.3%)      | Dermatology              | 4 (3.1%)             | 2 (1.2%)      | 6 (2.1%)   |
| Psychiatry               | 1 (0.7%)         | 5 (4.2%)             | 6 (2.3%)      | Nephrology               | 1 (0.8%)             | 4 (2.5%)      | 5 (1.7%)   |
| Intensive care           | 0 (0.0%)         | 3 (2.5%)             | 3 (1.2%)      | Obsterics and Gynecology | 1 (0.8%)             | 4 (2.5%)      | 5 (1.7%)   |
| Nephrology               | 2 (1.4%)         | 1 (0.8%)             | 3 (1.2%)      | Other                    | 2 (1.5%)             | 3 (1.9%)      | 5 (1.7%)   |
| Rehabilitation           | 1 (0.7%)         | 2 (1.7%)             | 3 (1.2%)      | Geriatrics               | 0 (0.0%)             | 4 (2.5%)      | 4 (1.4%)   |
| Allergology              | 2 (1.4%)         | 0 (0.0%)             | 2 (0.8%)      | Hematology               | 2 (1.5%)             | 2 (1.2%)      | 4 (1.4%)   |
| Physiotherapy            | 0 (0.0%)         | 2 (1.7%)             | 2 (0.8%)      | Ophthalmology            | 3 (2.3%)             | 1 (0.6%)      | 4 (1.4%)   |
| Orthopedics              | 0 (0.0%)         | 2 (1.7%)             | 2 (0.8%)      | Orthopedics              | 1 (0.8%)             | 2 (1.2%)      | 3 (1.0%)   |
| Community Health         | 0 (0.0%)         | 1 (0.8%)             | 1 (0.4%)      | Community Health         | 0 (0.0%)             | 3 (1.2%)      | 1 (0.3%)   |

|                |          |          |          |                      |          |          |          |
|----------------|----------|----------|----------|----------------------|----------|----------|----------|
| Dentistry      | 1 (0.7%) | 0 (0.0%) | 1 (0.4%) | Emergency care       | 0 (0.0%) | 5 (1.2%) | 1 (0.3%) |
| Emergency care | 0 (0.0%) | 1 (0.8%) | 1 (0.4%) | Neonatology          | 1 (0.8%) | 6 (1.2%) | 1 (0.3%) |
| Geriatrics     | 0 (0.0%) | 1 (0.8%) | 1 (0.4%) | Occupational Therapy | 0 (0.0%) | 7 (1.2%) | 1 (0.3%) |
| Other          | 0 (0.0%) | 1 (0.8%) | 1 (0.4%) | Otorhinolaryngology  | 1 (0.8%) | 8 (1.2%) | 1 (0.3%) |
| Urology        | 1 (0.7%) | 0 (0.0%) | 1 (0.4%) | Rehabilitation       | 0 (0.0%) | 9 (1.2%) | 1 (0.3%) |

For peer review only

1  
2  
3  
4  
5  
6  
7  
8  
9  
10  
11  
12  
13  
14  
15  
16  
17  
18  
19  
20  
21  
22  
23  
24  
25  
26  
27  
28  
29  
30  
31  
32  
33  
34  
35  
36  
37  
38  
39  
40  
41  
42  
43  
44  
45  
46

## STROBE Statement—Checklist of items that should be included in reports of *cross-sectional studies*

### The methods used to conduct the present study have previously been published:

Gryaznov D, Odutayo A, von Niederhäusern B, Speich B, Kasenda B, Ojeda-Ruiz E, et al. Rationale and design of repeated cross-sectional studies to evaluate the reporting quality of trial protocols: the Adherence to SPIrit REcommendations (ASPIRE) study and associated projects. *Trials*. 2020;21(1):896.  
 Link: <https://trialsjournal.biomedcentral.com/articles/10.1186/s13063-020-04808-y>

|                              | Item No | Recommendation                                                                                                                                                                                                           | Page No |
|------------------------------|---------|--------------------------------------------------------------------------------------------------------------------------------------------------------------------------------------------------------------------------|---------|
| <b>Title and abstract</b>    | 1       | (a) Indicate the study's design with a commonly used term in the title or the abstract (Section: Abstract, Design section)                                                                                               | 4       |
|                              |         | (b) Provide in the abstract an informative and balanced summary of what was done and what was found (Section: Abstract, Results section)                                                                                 | 5       |
| <b>Introduction</b>          |         |                                                                                                                                                                                                                          |         |
| Background/rationale         | 2       | Explain the scientific background and rationale for the investigation being reported (Section: Introduction, all paragraphs)                                                                                             | 6       |
| Objectives                   | 3       | State specific objectives, including any prespecified hypotheses (Section: Introduction, last paragraph)                                                                                                                 | 6       |
| <b>Methods</b>               |         |                                                                                                                                                                                                                          |         |
| Study design                 | 4       | Present key elements of study design early in the paper (Section: Methods 1 <sup>st</sup> paragraph (Published))                                                                                                         | 7       |
| Setting                      | 5       | Describe the setting, locations, and relevant dates, including periods of recruitment, exposure, follow-up, and data collection (Section: Methods, Identification of included trial protocols; Supplementary Figure 1)   | 7       |
| Participants                 | 6       | (a) Give the eligibility criteria, and the sources and methods of selection of participants (Section: Methods, Identification of included trial protocols)                                                               | 7       |
| Variables                    | 7       | Clearly define all outcomes, exposures, predictors, potential confounders, and effect modifiers. Give diagnostic criteria, if applicable (Section: Methods, Data Analysis, paragraphs 1 and 2)                           | 8       |
| Data sources/<br>measurement | 8*      | For each variable of interest, give sources of data and details of methods of assessment (measurement). Describe comparability of assessment methods if there is more than one group (Section: Methods, Data extraction) | 7       |
| Bias                         | 9       | Describe any efforts to address potential sources of bias (Section: Methods, Data extraction)                                                                                                                            | 7       |
| Study size                   | 10      | Explain how the study size was arrived at (Section: Methods 1 <sup>st</sup> paragraph (Published))                                                                                                                       | 7       |
| Quantitative variables       | 11      | Explain how quantitative variables were handled in the analyses. If applicable, describe which groupings were chosen and why (Section: Methods, Data Analysis, paragraph 1)                                              | 8       |
| Statistical methods          | 12      | (a) Describe all statistical methods, including those used to control for confounding (Section: Methods, Data Analysis, paragraph 2)                                                                                     | 8       |
|                              |         | (b) Describe any methods used to examine subgroups and interactions (Section: Methods, Data Analysis, paragraph 1)                                                                                                       | 8       |

1  
2  
3  
4  
5  
6  
7  
8  
9  
10  
11  
12  
13  
14  
15  
16  
17  
18  
19  
20  
21  
22  
23  
24  
25  
26  
27  
28  
29  
30  
31  
32  
33  
34  
35  
36  
37  
38  
39  
40  
41  
42  
43  
44  
45  
46  
47  
48  
49  
50  
51  
52  
53  
54  
55  
56  
57  
58  
59  
60

|                          |     |                                                                                                                                                                                                                                                                                                                                                                                                                                                                                                                                                                    |            |
|--------------------------|-----|--------------------------------------------------------------------------------------------------------------------------------------------------------------------------------------------------------------------------------------------------------------------------------------------------------------------------------------------------------------------------------------------------------------------------------------------------------------------------------------------------------------------------------------------------------------------|------------|
|                          |     | (c) Explain how missing data were addressed (na)                                                                                                                                                                                                                                                                                                                                                                                                                                                                                                                   |            |
|                          |     | (d) If applicable, describe analytical methods taking account of sampling strategy (na)                                                                                                                                                                                                                                                                                                                                                                                                                                                                            |            |
|                          |     | (e) Describe any sensitivity analyses (Section: Methods, Data Analysis, paragraph 1)                                                                                                                                                                                                                                                                                                                                                                                                                                                                               | 8          |
| <b>Results</b>           |     |                                                                                                                                                                                                                                                                                                                                                                                                                                                                                                                                                                    |            |
| Participants             | 13* | (a) Report numbers of individuals at each stage of study—eg numbers potentially eligible, examined for eligibility, confirmed eligible, included in the study, completing follow-up, and analysed (Supplementary Figure 1)<br>(b) Give reasons for non-participation at each stage (na)<br>(c) Consider use of a flow diagram (Supplementary Figure 1)                                                                                                                                                                                                             |            |
| Descriptive data         | 14* | (a) Give characteristics of study participants (eg demographic, clinical, social) and information on exposures and potential confounders (Section: Results, Characteristics of included trial protocols, paragraph 1 and 2. Table 1)<br>(b) Indicate number of participants with missing data for each variable of interest (na)                                                                                                                                                                                                                                   | 9          |
| Outcome data             | 15* | Report numbers of outcome events or summary measures (Section: Results, Adherence to SPIRIT in protocols from 2012 and 2016. Table 2, Figure 1)                                                                                                                                                                                                                                                                                                                                                                                                                    | 9,10       |
| Main results             | 16  | (a) Give unadjusted estimates and, if applicable, confounder-adjusted estimates and their precision (eg, 95% confidence interval). Make clear which confounders were adjusted for and why they were included (Section: Results, Multivariable regression analysis. Figure 2, Supplementary Table 7)<br>(b) Report category boundaries when continuous variables were categorized (Section: Methods, Data Analysis, paragraph 2. Figure 2)<br>(c) If relevant, consider translating estimates of relative risk into absolute risk for a meaningful time period (na) | 10,11<br>8 |
| Other analyses           | 17  | Report other analyses done—eg analyses of subgroups and interactions, and sensitivity analyses (Section: Results, Multivariable regression analysis. Supplementary Table 7)                                                                                                                                                                                                                                                                                                                                                                                        | 10,11      |
| <b>Discussion</b>        |     |                                                                                                                                                                                                                                                                                                                                                                                                                                                                                                                                                                    |            |
| Key results              | 18  | Summarise key results with reference to study objectives (Section: Discussion, Main findings and interpretation)                                                                                                                                                                                                                                                                                                                                                                                                                                                   | 11,12      |
| Limitations              | 19  | Discuss limitations of the study, taking into account sources of potential bias or imprecision. Discuss both direction and magnitude of any potential bias (Section: Discussion, Strengths and limitations, all paragraphs)                                                                                                                                                                                                                                                                                                                                        | 12,<br>13  |
| Interpretation           | 20  | Give a cautious overall interpretation of results considering objectives, limitations, multiplicity of analyses, results from similar studies, and other relevant evidence (Section: Discussion, Comparison with other studies, Implications, all paragraphs)                                                                                                                                                                                                                                                                                                      | 13,<br>14  |
| Generalisability         | 21  | Discuss the generalisability (external validity) of the study results (Section: Discussion, Strengths and limitations, paragraphs 1 and 2)                                                                                                                                                                                                                                                                                                                                                                                                                         | 12,<br>13  |
| <b>Other information</b> |     |                                                                                                                                                                                                                                                                                                                                                                                                                                                                                                                                                                    |            |



|         |    |                                                                                                                                                                                                |    |
|---------|----|------------------------------------------------------------------------------------------------------------------------------------------------------------------------------------------------|----|
| Funding | 22 | Give the source of funding and the role of the funders for the present study and, if applicable, for the original study on which the present article is based (Section: Declarations, Funding) | 16 |
|---------|----|------------------------------------------------------------------------------------------------------------------------------------------------------------------------------------------------|----|

\*Give information separately for exposed and unexposed groups.

**Note:** An Explanation and Elaboration article discusses each checklist item and gives methodological background and published examples of transparent reporting. The STROBE checklist is best used in conjunction with this article (freely available on the Web sites of PLoS Medicine at <http://www.plosmedicine.org/>, Annals of Internal Medicine at <http://www.annals.org/>, and Epidemiology at <http://www.epidem.com/>). Information on the STROBE Initiative is available at [www.strobe-statement.org](http://www.strobe-statement.org).

For peer review only
