# Supplementary material for: Reporting quality of clinical trial protocols: a repeated cross-sectional study about the Adherence to SPIrit Recommendations in Switzerland, CAnada and GErmany (ASPIRE-SCAGE)
Source: PubMed Central journal article supplement — BMJ Open. 2022 May 19;12(5):e053417. doi: 10.1136/bmjopen-2021-053417 (PMC9125701; doi:10.1136/bmjopen-2021-053417), 2022-05-19
Supplement: bmjopen-2021-053417supp001.pdf [file bmjopen-2021-053417supp001.pdf]

## Reporting quality of clinical trial protocols: a repeated cross sectional study about the Adherence to SPIrit Recommendations in Switzerland, CA Canada, and GERmany (ASPIRE-SCAGE)

### Supplementary material

- 1. Supplementary Figure 1:** “Flow diagram for included randomised clinical trial protocols in ASPIRE with ethics approval in 2012 and 2016 from Switzerland, Germany, and Canada”
- 2. Supplementary Figure 2:** Box-plots of proportions of reported SPIRIT items by year and tertile in investigator-sponsored protocols
- 3. Supplementary Table 1:** Data Extraction Form
- 4. Supplementary Table 2:** Adherence to SPIRIT items in RCT protocols by approval year and median target sample size, multicentre vs single centre trials, and with vs without CTU or CRO support
- 5. Supplementary Table 3:** Adherence to SPIRIT items in RCT protocols by country and sponsorship
- 6. Supplementary Table 4:** Sensitivity analyses of calculating the adherence to SPIRIT items for RCT protocols by sponsorship
- 7. Supplementary Table 5:** Adherence to individual SPIRIT items by year and sponsorship
- 8. Supplementary Table 6:** Adherence to SPIRIT items in Investigator-sponsored protocols that improved by 10% or more
- 9. Supplementary Table 7:** Results from multivariable Beta and Logistic regressions for all approaches
- 10. Supplementary Table 8:** Results from multivariable Beta regression, subset of Investigator-sponsored protocols
- 11. Supplementary Table 9:** Medical disciplines of included RCTs

## Supplementary Figure 1

**Figure 1A:** Flow diagram for included randomized clinical trial protocols in ASPIRE with ethics approval in 2012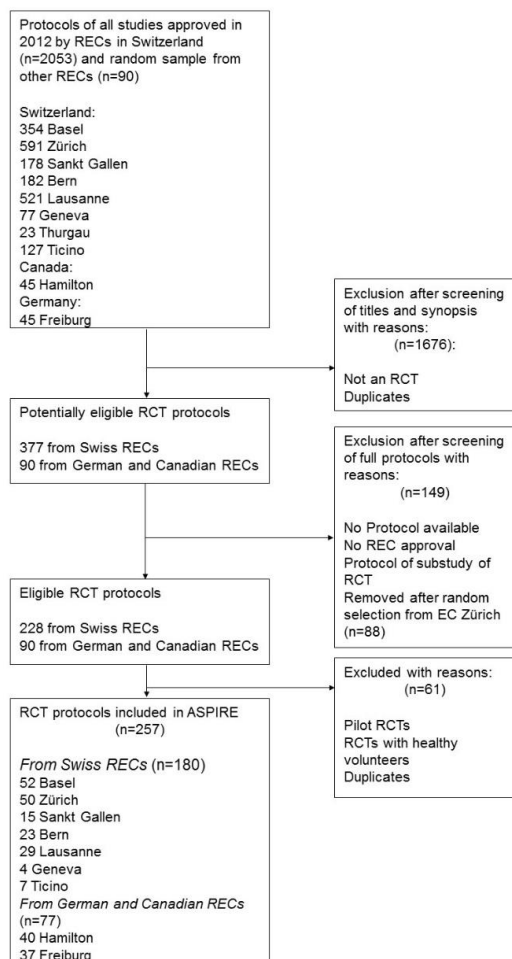**Figure 1B:** Flow diagram for included randomized clinical trial protocols in ASPIRE with ethics approval in 2016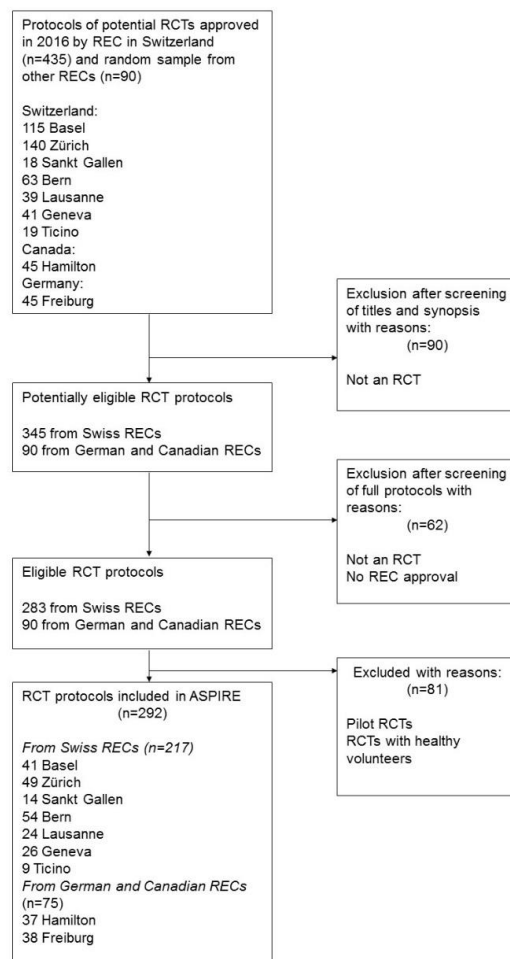

Abbreviations: REC: Research Ethic Committee; RCT: Randomised clinical trial

**Legend Supplementary eFigure 1:** Flow diagram for included randomised clinical trial protocols in ASPIRE with ethics approval in 2012 and 2016 from Switzerland, Germany, and Canada

## Supplementary Figure 2

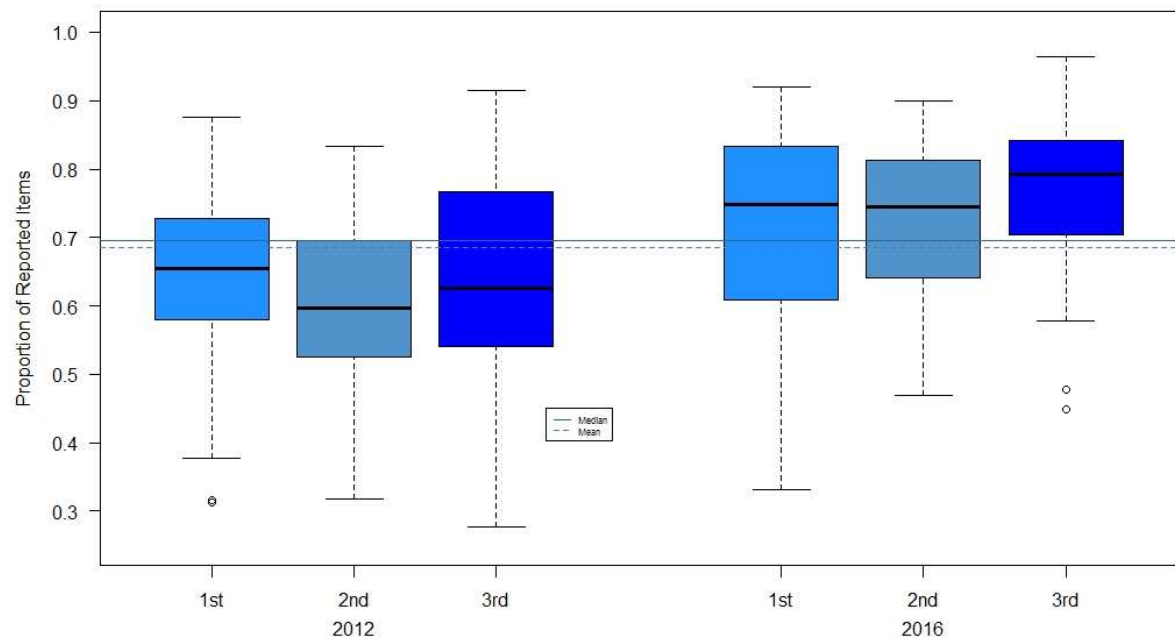

**Legend Supplementary eFigure 2:** Box-plots of proportions of reported SPIRIT items by year and tertile in investigator-sponsored protocols

## Supplementary Table 1

## Data Extraction Form

| Label                                                                                          | Options                                               |
|------------------------------------------------------------------------------------------------|-------------------------------------------------------|
| 1. Country of Ethics Committee                                                                 |                                                       |
| 2. Name of Ethics Centre                                                                       |                                                       |
| 3. Local Ethics Identification Number                                                          |                                                       |
| 4. Sponsor name (title, first name, surname, company if applicable)                            |                                                       |
| 5. Sponsor email address                                                                       |                                                       |
| 6. Site/Location of overall study initiation (PI affiliation)                                  | Switzerland                                           |
|                                                                                                | Other                                                 |
|                                                                                                | Not reported                                          |
| If site initiation in Switzerland, please provide name and location of institution:            |                                                       |
| 7. Study Acronym                                                                               |                                                       |
| 8. Study Title (Exact Quote)                                                                   |                                                       |
| 9. Date of Ethics Application                                                                  |                                                       |
| 9a. Date of first RESPONSE by Ethics Committee (does not need to be the same as approval date) |                                                       |
| 9b. Response category (Switzerland specific, others select "not applicable")                   | A positiv                                             |
|                                                                                                | B positiv mit Bemerkung                               |
|                                                                                                | C mit Auflage, Nachbegutachtung notwendig             |
|                                                                                                | C mit Auflage, schriftliche Mitteilung ausreichend    |
|                                                                                                | D negativ                                             |
|                                                                                                | E Nicht-Eintreten                                     |
|                                                                                                | Not applicable as Ethics Committee not in Switzerland |
| 10. Date of first APPROVAL by Ethics Committee                                                 |                                                       |
| 11. Clinical Area                                                                              | Medical                                               |
|                                                                                                | Surgical                                              |
|                                                                                                | Paediatrics                                           |
|                                                                                                | Other                                                 |
| If medical area, choose from list                                                              | Neurology                                             |
|                                                                                                | Cardiovascular                                        |
|                                                                                                | Respiratory                                           |
|                                                                                                | Gastro/intestinal                                     |
|                                                                                                | Nephrology                                            |
|                                                                                                | Rheumatology                                          |
|                                                                                                | Infectious Disease                                    |
|                                                                                                | Oncology                                              |
|                                                                                                | Intensive Care                                        |
| Hematology                                                                                     |                                                       |

|                                            |                        |
|--------------------------------------------|------------------------|
|                                            | Endocrinology          |
|                                            | Dermatology            |
|                                            | Anaesthetics           |
|                                            | Psychiatry             |
|                                            | Other                  |
| If surgical area, choose from list         | General Surgery        |
|                                            | Obstetrics/Gynecology  |
|                                            | Neurosurgery           |
|                                            | Ophthalmology          |
|                                            | Ear-nose-throat (ENT)  |
|                                            | Cardiothoracic         |
|                                            | Urology                |
|                                            | Orthopedics            |
|                                            | Plastic Surgery        |
|                                            | Other                  |
| If pediatrics area, choose from list       | Neurology              |
|                                            | Cardiovascular         |
|                                            | Respiratory            |
|                                            | Gastro/intestinal      |
|                                            | Nephrology             |
|                                            | Rheumatology           |
|                                            | Infectious diseases    |
|                                            | Oncology               |
|                                            | Intensive care         |
|                                            | Hematology             |
|                                            | Endocrinology          |
|                                            | Dermatology            |
|                                            | Anaesthetics           |
|                                            | General surgery        |
|                                            | Neurosurgery           |
|                                            | Ophthalmology          |
|                                            | Ear-nose-throat (ENT)  |
|                                            | Cardiothoracic         |
|                                            | Urology                |
|                                            | Orthopedics            |
|                                            | Plastic Surgery        |
|                                            | Other                  |
| 12. Trial Registration Number              |                        |
| 13. Trial Registry Name                    | Clinicaltrials.gov     |
|                                            | ISRCTN                 |
|                                            | EudraCT                |
|                                            | ANZCTR                 |
|                                            | Not reported           |
|                                            | Other (please specify) |
| 14. Swiss Human Research Act Risk Category | A                      |

|                                                                                                                                                |                                                                                                               |
|------------------------------------------------------------------------------------------------------------------------------------------------|---------------------------------------------------------------------------------------------------------------|
|                                                                                                                                                | B                                                                                                             |
|                                                                                                                                                | C                                                                                                             |
|                                                                                                                                                | Not applicable                                                                                                |
|                                                                                                                                                | Not reported                                                                                                  |
| 15. Is trial labelled as pilot or feasibility trial?                                                                                           | Yes                                                                                                           |
|                                                                                                                                                | No                                                                                                            |
| 16. Is it a dose finding trial?                                                                                                                | Yes                                                                                                           |
|                                                                                                                                                | No                                                                                                            |
| 17. Hypothesis (check all that apply)                                                                                                          | Superiority                                                                                                   |
|                                                                                                                                                | Non-inferiority / Equivalence                                                                                 |
|                                                                                                                                                | Not labelled in this regard / unclear                                                                         |
| 18. Please copy the primary outcome(s) from the protocol                                                                                       |                                                                                                               |
| 19. Are any outcomes specifically labelled as "adverse events", "adverse effects", "side effects", or "tolerability"?                          | Yes                                                                                                           |
|                                                                                                                                                | No                                                                                                            |
| If yes, adverse events (or synonyms thereof) are...                                                                                            | not further specified (e.g. the term adverse events is just mentioned under outcome section)                  |
|                                                                                                                                                | specifically defined (e.g. specific types of adverse events such as rash, itching, nausea etc. are mentioned) |
| 20. Is a patient-reported outcome specified (an outcome that comprises information reported by a patient or a caregiver (parent or guardian))? | Yes                                                                                                           |
|                                                                                                                                                | No                                                                                                            |
| If yes: the specified patient-reported outcome captures the following information (check all that apply):                                      | Symptoms (pain, headaches, sleeplessness, etc.)                                                               |
|                                                                                                                                                | Physical functioning                                                                                          |
|                                                                                                                                                | Mental/emotional functioning                                                                                  |
|                                                                                                                                                | Social functioning                                                                                            |
|                                                                                                                                                | Disease-specific outcome measure (eg. Asthma QoL questionnaire, Beck Depression Inventory)                    |
|                                                                                                                                                | Multidimensional health-related quality of life (HRQL; eg. SF-36)                                             |
|                                                                                                                                                | Overall sense of well-being in one question (holistic HRQL; eg. captured with a VAS)                          |
|                                                                                                                                                | Satisfaction with treatment                                                                                   |

|                                                                                         |                                                                                 |
|-----------------------------------------------------------------------------------------|---------------------------------------------------------------------------------|
|                                                                                         | Utility (an individual's preferences/values for certain health states/outcomes) |
|                                                                                         | Other (please specify)                                                          |
| If yes: patient-reported outcome + measurement instrument                               |                                                                                 |
| If yes, patient-reported outcome used for sample size calculation?                      | Yes                                                                             |
|                                                                                         | No                                                                              |
| If yes, minimal important difference (MID) mentioned?                                   | Yes                                                                             |
|                                                                                         | No                                                                              |
| If yes, reference for MID? (please enter full citation or if not reported, enter "NR")  |                                                                                 |
| 20a. Is routinely collected data used in the study?                                     | Yes                                                                             |
|                                                                                         | No                                                                              |
| 20b. If yes, routinely collected data is used:                                          | For patient identification and/or recruitment?                                  |
|                                                                                         | As part of the randomized intervention?                                         |
|                                                                                         | For any of the planned outcomes?                                                |
|                                                                                         | Other                                                                           |
| 21. Any planned collection of costs or cost-effectiveness analysis mentioned?           | Yes                                                                             |
|                                                                                         | No                                                                              |
| 22. The setting for the majority of recruited patients is (check all that apply)        | Community                                                                       |
|                                                                                         | Outpatient clinic                                                               |
|                                                                                         | Emergency department                                                            |
|                                                                                         | In-patients hospital care                                                       |
|                                                                                         | Intensive care unit                                                             |
|                                                                                         | Unclear                                                                         |
| 23. The age-group of patient population is (check all that apply)                       | Adults ( $\geq 16$ years)                                                       |
|                                                                                         | Only elderly ( $\geq 60$ )                                                      |
|                                                                                         | Pediatric ( $< 18$ )                                                            |
| 24. Please specify the study population                                                 |                                                                                 |
| 25. Estimated sample size/number of participants                                        |                                                                                 |
| 26. Number of overall study centres                                                     |                                                                                 |
| 27. If multicentre, national or multinational                                           | National                                                                        |
|                                                                                         | International                                                                   |
|                                                                                         | Not applicable                                                                  |
| 28. Number of study centres recruiting in Switzerland (or Canada/Germany if applicable) |                                                                                 |
| 29. Trial Design (check all that apply)                                                 | Parallel                                                                        |
|                                                                                         | Crossover                                                                       |
|                                                                                         | Cluster                                                                         |
|                                                                                         | Factorial                                                                       |
|                                                                                         | Split Body                                                                      |
|                                                                                         | Other                                                                           |

|                                                                                                                                        |                                                    |
|----------------------------------------------------------------------------------------------------------------------------------------|----------------------------------------------------|
|                                                                                                                                        | Not applicable                                     |
| 30. Number of trial arms                                                                                                               |                                                    |
| 31. Presence of logistic/ methodological support/experience? (check all that apply)                                                    | Clinical trial unit (CTU)                          |
|                                                                                                                                        | Contract Research Organization (CRO)               |
|                                                                                                                                        | Evidence for ample expertise of the PI/Institution |
|                                                                                                                                        | Not reported                                       |
|                                                                                                                                        | Other                                              |
| 32. Please specify the intervention(s)                                                                                                 |                                                    |
| 33. Intervention category/ies                                                                                                          | Drug                                               |
|                                                                                                                                        | Surgery / Invasive Procedure                       |
|                                                                                                                                        | Device                                             |
|                                                                                                                                        | Vaccine                                            |
|                                                                                                                                        | Radiation                                          |
|                                                                                                                                        | Rehabilitation                                     |
|                                                                                                                                        | Behavioural / Lifestyle / Education / Counselling  |
|                                                                                                                                        | Dietary Supplement                                 |
| Other                                                                                                                                  |                                                    |
| 34. Please specify the control(s)                                                                                                      |                                                    |
| 35. Type of control(s)                                                                                                                 | No treatment / Standard care                       |
|                                                                                                                                        | Active (drug/other treatment)                      |
|                                                                                                                                        | Placebo / Sham                                     |
| 36. Name of funder(s)                                                                                                                  |                                                    |
| 37. Initiation/Sponsorship                                                                                                             | Definitely industry initiated                      |
|                                                                                                                                        | Probably industry initiated                        |
|                                                                                                                                        | Probably investigator initiated                    |
|                                                                                                                                        | Definitely investigator initiated                  |
| 38. Title: Basic study design, patient population, and intervention provided in study title (if applicable trial acronym)? (reporting) | Yes                                                |
|                                                                                                                                        | No                                                 |
| 39. Trial Registration: Registry name and trial identifier provided? (reporting)                                                       | Yes                                                |
|                                                                                                                                        | No                                                 |
| 40. Protocol: Version Number and date provided? (reporting)                                                                            | Yes                                                |
|                                                                                                                                        | No                                                 |
| 41. Funding: Sources of financial and non-financial support declared? (reporting)                                                      | Yes                                                |
|                                                                                                                                        | No                                                 |
| 42. Roles and Responsibilities: Names of protocol contributors/ authors provided? (reporting)                                          | Yes                                                |
|                                                                                                                                        | No                                                 |
|                                                                                                                                        | Yes                                                |



|                                                                                                                                                                                                                          |                |
|--------------------------------------------------------------------------------------------------------------------------------------------------------------------------------------------------------------------------|----------------|
| 43. Roles and Responsibilities: Name and contact details of sponsor provided? (reporting)                                                                                                                                | No             |
| 44. Roles and Responsibilities: Role of sponsor and funder in trial described? (reporting)                                                                                                                               | Yes            |
|                                                                                                                                                                                                                          | No             |
| 45. Roles and Responsibilities: Steering Committee General Membership and Role described? (reporting)                                                                                                                    | Yes            |
|                                                                                                                                                                                                                          | No             |
|                                                                                                                                                                                                                          | Not applicable |
| 46. Background and rationale: Is research question described and justified? (as a minimum, we expect a systematic search, see info) (reporting)                                                                          | Yes            |
|                                                                                                                                                                                                                          | No             |
| 46a. Systematic review on PICO explicitly mentioned in background/introduction?                                                                                                                                          | Yes            |
|                                                                                                                                                                                                                          | No             |
| 47. Background and rationale: Comparator choice explained? (reporting)                                                                                                                                                   | Yes            |
|                                                                                                                                                                                                                          | No             |
| 48. Objectives: Specific objectives described for each comparison (if multiple)? (reporting)                                                                                                                             | Yes            |
|                                                                                                                                                                                                                          | No             |
| 49. Trial design: Trial design described? (trial type (eg, parallel group, crossover, factorial, single group), allocation ratio, and framework (eg, superiority, equivalence, noninferiority, exploratory)) (reporting) | Yes            |
|                                                                                                                                                                                                                          | No             |
| 50. Study Setting: Are countries where data will be collected listed? (reporting)                                                                                                                                        | Yes            |
|                                                                                                                                                                                                                          | No             |
| 51. Eligibility criteria: Inclusion and exclusion criteria for trial participants described? (reporting)                                                                                                                 | Yes            |
|                                                                                                                                                                                                                          | No             |
| 52. Eligibility criteria: Inclusion and exclusion criteria for study centres and individuals who will perform the intervention described? (reporting)                                                                    | Yes            |
|                                                                                                                                                                                                                          | No             |
|                                                                                                                                                                                                                          | Not applicable |
| 53. Intervention(drug): Generic Name, Dose and Schedule of intervention described? (reporting)                                                                                                                           | Yes            |
|                                                                                                                                                                                                                          | No             |
|                                                                                                                                                                                                                          | Not applicable |
| 54. Intervention(non-drug): Setting of intervention administration described? (reporting)                                                                                                                                | Yes            |
|                                                                                                                                                                                                                          | No             |
|                                                                                                                                                                                                                          | Not applicable |
| 55. Intervention(non-drug): Individuals administering interventions (e.g. expertise) mentioned? (reporting)                                                                                                              | Yes            |
|                                                                                                                                                                                                                          | No             |
|                                                                                                                                                                                                                          | Not applicable |
| 56. Interventions - Modifications: Standard criteria for modifications of interventions described? (reporting)                                                                                                           | Yes            |
|                                                                                                                                                                                                                          | No             |
|                                                                                                                                                                                                                          | Not applicable |
| 57. Interventions - Adherence: Are strategies to improve adherence or any procedures for monitoring adherence described? (reporting)                                                                                     | Yes            |
|                                                                                                                                                                                                                          | No             |
|                                                                                                                                                                                                                          | Not applicable |
| 58. Interventions - Concomitant care: Permitted care and interventions during trial described? (reporting)                                                                                                               | Yes            |
|                                                                                                                                                                                                                          | No             |
| 59. Primary Outcome: Specific measurement variable described? (reporting)                                                                                                                                                | Yes            |
|                                                                                                                                                                                                                          | No             |
|                                                                                                                                                                                                                          | Not applicable |
|                                                                                                                                                                                                                          | Yes            |

|                                                                                                            |                |
|------------------------------------------------------------------------------------------------------------|----------------|
| 60. Primary Outcome: Analysis metric (e.g. change from baseline) described? (reporting)                    | No             |
|                                                                                                            | Not applicable |
| 61. Primary Outcomes: Is time point of measurement mentioned? (reporting)                                  | Yes            |
|                                                                                                            | No             |
|                                                                                                            | Not applicable |
| 62. Participant timeline: Timing of visit for participants described (e.g. schematic diagram)? (reporting) | Yes            |
|                                                                                                            | No             |
| 63. Sample size: Estimated number total or per group mentioned? (reporting)                                | Yes            |
|                                                                                                            | No             |
| 64. Sample size: Outcome used for samples size calculation described? (reporting)                          | Yes            |
|                                                                                                            | No             |
|                                                                                                            | Not applicable |
| 65. Sample size: Assumed values for outcome in each study group provided? (reporting)                      | Yes            |
|                                                                                                            | No             |
|                                                                                                            | Not applicable |
| 66. Sample size: Rationale or reference for assumed outcome values provided? (reporting)                   | Yes            |
|                                                                                                            | No             |
|                                                                                                            | Not applicable |
| 67. Sample size: Type of statistical test provided? (reporting)                                            | Yes            |
|                                                                                                            | No             |
|                                                                                                            | Not applicable |
| 68. Sample size: Alpha value provided? (reporting)                                                         | Yes            |
|                                                                                                            | No             |
|                                                                                                            | Not applicable |
| 69. Sample size: Statistical Power provided? (reporting)                                                   | Yes            |
|                                                                                                            | No             |
|                                                                                                            | Not applicable |
| 70. Sample size: Adjustment for missing data, if relevant, described? (reporting)                          | Yes            |
|                                                                                                            | No             |
|                                                                                                            | Not applicable |
| 71. Sample size: Rationale for intended sample size if not derived statistically provided? (reporting)     | Yes            |
|                                                                                                            | No             |
|                                                                                                            | Not applicable |
| 72. Recruitment: Location of participant recruitment described? (reporting)                                | Yes            |
|                                                                                                            | No             |
| 73. Recruitment: Person(s) who will recruit participants described? (reporting)                            | Yes            |
|                                                                                                            | No             |
| 74. Recruitment: Expected recruitment rate provided? (reporting)                                           | Yes            |
|                                                                                                            | No             |
| 75. Recruitment: Estimated number or rate of eligible patients                                             |                |
| 76. Recruitment: Estimated duration of the patient recruitment                                             |                |
| 77. Recruitment: Monitoring of recruitment during trial mentioned? (reporting)                             | Yes            |
|                                                                                                            | No             |
| 78. Recruitment: Financial and non-financial incentives for participants described? (reporting)            | Yes            |
|                                                                                                            | No             |

|                                                                                                                                          |                |
|------------------------------------------------------------------------------------------------------------------------------------------|----------------|
|                                                                                                                                          | Not applicable |
| 79. Recruitment: Financial and non-financial incentives for investigators described? (reporting)                                         | Yes            |
|                                                                                                                                          | No             |
| 80. Allocation: Method for generation of random sequence described? ( e.g. computer-generated random numbers) (reporting)                | Yes            |
|                                                                                                                                          | No             |
|                                                                                                                                          | Not applicable |
| 81. Allocation: Ratio provided? (e.g. 1:1, 2:1) (reporting)                                                                              | Yes            |
|                                                                                                                                          | No             |
|                                                                                                                                          | Not applicable |
| 82. Allocation: Type of randomization described? (e.g. "simple", block, matched pair, etc.) (reporting)                                  | Yes            |
|                                                                                                                                          | No             |
|                                                                                                                                          | Not applicable |
| 83. Allocation: Non-random allocation-method described? (reporting)                                                                      | Yes            |
|                                                                                                                                          | No             |
|                                                                                                                                          | Not applicable |
| 84. Allocation: Rationale for non-random allocation provided? (reporting)                                                                | Yes            |
|                                                                                                                                          | No             |
|                                                                                                                                          | Not applicable |
| 85. Allocation: Allocation concealment mechanism described? (reporting)                                                                  | Yes            |
|                                                                                                                                          | No             |
|                                                                                                                                          | Not applicable |
| 86. Allocation: Person who will enroll/assign participants described? (reporting)                                                        | Yes            |
|                                                                                                                                          | No             |
|                                                                                                                                          | Not applicable |
| 87. Blinding: Status of participants described? (reporting)                                                                              | Yes            |
|                                                                                                                                          | No             |
| 88. Blinding: Status of care providers described? (reporting)                                                                            | Yes            |
|                                                                                                                                          | No             |
| 89. Blinding: Status of outcome assessors described? (reporting)                                                                         | Yes            |
|                                                                                                                                          | No             |
| 90. Blinding: Conditions when unblinding is permissible mentioned? (reporting)                                                           | Yes            |
|                                                                                                                                          | No             |
|                                                                                                                                          | Not applicable |
| 91. Data Collection: Personnel who will collect data specified? (reporting)                                                              | Yes            |
|                                                                                                                                          | No             |
| 92. Data collection: Strategies to promote participant retention and complete follow-up described? (reporting)                           | Yes            |
|                                                                                                                                          | No             |
| 93. Data Management: Data entry and coding processes described? (reporting)                                                              | Yes            |
|                                                                                                                                          | No             |
| 94. Statistical Methods: Main analysis for primary outcome including analysis methods for statistical comparisons described? (reporting) | Yes            |
|                                                                                                                                          | No             |
| 95. Statistical Methods: Handling of missing data defined? (reporting)                                                                   | Yes            |
|                                                                                                                                          | No             |
|                                                                                                                                          | Not applicable |
|                                                                                                                                          | Yes            |

|                                                                                                                                                                          |                           |
|--------------------------------------------------------------------------------------------------------------------------------------------------------------------------|---------------------------|
| 96. Statistical Methods: Effect measure for primary analysis clearly specified? (e.g. risk ratio, odds ratio etc.) (reporting)                                           | No                        |
| 97. Statistical Methods: Significance level specified? (e.g. alpha of 5% or p<0.05) (reporting)                                                                          | Yes                       |
|                                                                                                                                                                          | No                        |
| 98. Statistical Methods: Use of confidence intervals mentioned? (e.g. "results will be accompanied by a confidence interval") (reporting)                                | Yes                       |
|                                                                                                                                                                          | No                        |
| 99. Statistical Methods: Definition of subgroup categories provided? (reporting)                                                                                         | Yes                       |
|                                                                                                                                                                          | No                        |
|                                                                                                                                                                          | Not applicable            |
| 100. Any subgroup analysis mentioned (this question triggers a set of questions for a subproject independent of SPIRIT)?                                                 | Yes                       |
|                                                                                                                                                                          | No                        |
| If yes, is it explicitly mentioned that subgroup analyses are exploratory?                                                                                               | Yes                       |
|                                                                                                                                                                          | No                        |
| If yes, is a clear hypothesis for a subgroup effect pre-specified?                                                                                                       | Yes                       |
|                                                                                                                                                                          | No                        |
| If yes, is a clear hypothesis with a direction of subgroup effect pre-specified?                                                                                         | Yes                       |
|                                                                                                                                                                          | No                        |
| If yes, use of interaction test for subgroup analysis mentioned?                                                                                                         | Yes                       |
|                                                                                                                                                                          | No                        |
| If yes, please list planned subgroup variables                                                                                                                           |                           |
| If yes, please list planned outcomes for subgroup analyses                                                                                                               |                           |
| If yes, please specify number of subgroup analyses planned (=SG variables x outcomes)                                                                                    |                           |
| If yes, subgroup analysis considered in sample size calculation?                                                                                                         | Yes                       |
|                                                                                                                                                                          | No                        |
| 101. Statistical Methods: Does the protocol define which participants will be included in the main analysis in terms of protocol adherence and missing data? (reporting) | Yes                       |
|                                                                                                                                                                          | No                        |
| 102. Data Monitoring Committee: Is a data monitoring committee planned for this study?                                                                                   | Yes                       |
|                                                                                                                                                                          | No                        |
| 103. Data Monitoring Committee: Is it explicitly reported whether a DMC is planned or why it is not planned? (reporting)                                                 | Yes                       |
|                                                                                                                                                                          | No                        |
| 104. Data Monitoring: Planned number of interim analyses                                                                                                                 |                           |
| 105. Data Monitoring: Purpose of interim analyses (check all that apply)                                                                                                 | Benefit                   |
|                                                                                                                                                                          | Harm                      |
|                                                                                                                                                                          | Futility                  |
|                                                                                                                                                                          | Sample size recalculation |
|                                                                                                                                                                          | No reason provided        |
|                                                                                                                                                                          | Not applicable            |
| 106. Data Monitoring: Reported who has ultimate authority to stop the trial? (reporting)                                                                                 | Yes                       |
|                                                                                                                                                                          | No                        |
| 107. Data Monitoring: Does the sponsor retain the right to stop the trial?                                                                                               | Yes                       |
|                                                                                                                                                                          | No                        |
|                                                                                                                                                                          | Not reported              |
| If yes, explicitly at any time for any reason?                                                                                                                           | Yes                       |
|                                                                                                                                                                          | No                        |

|                                                                                                                                                                                                  |                                                                                                                                                                 |
|--------------------------------------------------------------------------------------------------------------------------------------------------------------------------------------------------|-----------------------------------------------------------------------------------------------------------------------------------------------------------------|
| 108. Harms: Plans for collecting, assessing, reporting, managing anticipated/unanticipated adverse events provided? (reporting)                                                                  | Yes                                                                                                                                                             |
|                                                                                                                                                                                                  | No                                                                                                                                                              |
| 109. Auditing: Procedures of audits and/or external monitoring described (e.g. clinical trial unit/CROs)? (reporting)                                                                            | Yes                                                                                                                                                             |
|                                                                                                                                                                                                  | No                                                                                                                                                              |
|                                                                                                                                                                                                  | Not applicable                                                                                                                                                  |
| 110. Research Ethics Approval: Where approval has been obtained, or plans for seeking approval, provided? (should always be yes in this study) (reporting)                                       | Yes                                                                                                                                                             |
|                                                                                                                                                                                                  | No                                                                                                                                                              |
| 111. Protocol Amendments: Process for making amendments described? (reporting)                                                                                                                   | Yes                                                                                                                                                             |
|                                                                                                                                                                                                  | No                                                                                                                                                              |
| 112. Consent or Assent: Informed Consent process described? (reporting)                                                                                                                          | Yes                                                                                                                                                             |
|                                                                                                                                                                                                  | No                                                                                                                                                              |
| 113. Consent or Assent – Ancillary Studies: Process to obtain additional consent for collection and use of data and biological specimens described? (reporting)                                  | Yes                                                                                                                                                             |
|                                                                                                                                                                                                  | No                                                                                                                                                              |
|                                                                                                                                                                                                  | Not applicable                                                                                                                                                  |
| 114. Confidentiality: Described how data will be collected, kept secure, and maintained during the trial? (reporting)                                                                            | Yes                                                                                                                                                             |
|                                                                                                                                                                                                  | No                                                                                                                                                              |
| 115. Declaration of Interests: Financial and other competing interests clearly stated? (reporting)                                                                                               | Yes                                                                                                                                                             |
|                                                                                                                                                                                                  | No                                                                                                                                                              |
| 116. Access to data: Is it clearly mentioned who will have access to full dataset after trial completion? (reporting)                                                                            | Yes                                                                                                                                                             |
|                                                                                                                                                                                                  | No                                                                                                                                                              |
| 117. Ancillary and post-trial care: Any plans to provide or pay for ancillary care during the trial provided? (reporting)                                                                        | Yes                                                                                                                                                             |
|                                                                                                                                                                                                  | No                                                                                                                                                              |
| 118. Dissemination Policy: Plans to disseminate trial results to key stakeholders/publication provided? (reporting)                                                                              | Yes                                                                                                                                                             |
|                                                                                                                                                                                                  | No                                                                                                                                                              |
| 119. Dissemination Policy: Does the protocol mention any rules/regulations between the investigators and the sponsor with respect to the rights of publication of the trial results? (reporting) | Yes                                                                                                                                                             |
|                                                                                                                                                                                                  | No                                                                                                                                                              |
|                                                                                                                                                                                                  | Not applicable                                                                                                                                                  |
| If yes, please copy the corresponding statement from the protocol                                                                                                                                |                                                                                                                                                                 |
| If yes, which statement suits best?                                                                                                                                                              | Only the sponsor retains the right to analyze and publish the data (no cooperation with investigators at all)                                                   |
|                                                                                                                                                                                                  | The sponsor retains the right to approve any manuscript/abstract before publication (sponsor retains explicitly the right to reject submission for publication) |
|                                                                                                                                                                                                  | The sponsor retains at least the right to review and comment on any manuscript/abstract before publication                                                      |

|                                                                                                            |                                                                                                                                                                     |
|------------------------------------------------------------------------------------------------------------|---------------------------------------------------------------------------------------------------------------------------------------------------------------------|
|                                                                                                            | Free publication rights for the investigators, no constraints at all by the sponsor (sponsor has explicitly NOT the right to reject the submission for publication) |
|                                                                                                            | Protocol refers to a separate publication agreement between sponsor and investigator                                                                                |
|                                                                                                            | Other (Please enter description for other)                                                                                                                          |
| 120. Dissemination Policy: Authorship eligibility criteria described?                                      | Yes                                                                                                                                                                 |
|                                                                                                            | No                                                                                                                                                                  |
| 121. Dissemination Policy: Plans for granting access to full trial protocol provided? (reporting)          | Yes                                                                                                                                                                 |
|                                                                                                            | No                                                                                                                                                                  |
| 122. Informed Consent Materials: Model consent and/or assent forms provided (e.g in Appendix)? (reporting) | Yes                                                                                                                                                                 |
|                                                                                                            | No                                                                                                                                                                  |
| 123. Biological Specimens: Details of specimen collection provided? (reporting)                            | Yes                                                                                                                                                                 |
|                                                                                                            | No                                                                                                                                                                  |
|                                                                                                            | Not applicable                                                                                                                                                      |
| 124. Any comments?                                                                                         |                                                                                                                                                                     |

**Supplementary Table 2: Adherence to SPIRIT items in RCT protocols by approval year and median target sample size, multicentre vs single centre trials, and with vs without CTU or CRO support.**

| Characteristic                          | 2012                          |              |                            |              | 2016                          |              |                            |              |
|-----------------------------------------|-------------------------------|--------------|----------------------------|--------------|-------------------------------|--------------|----------------------------|--------------|
|                                         | median (IQR)                  | mean (SD)    | median (IQR)               | mean (SD)    | median (IQR)                  | mean (SD)    | median (IQR)               | mean (SD)    |
|                                         | Sample size <= 220 (n=117)    |              | Sample size > 220 (n=140)  |              | Sample size <= 220 (n=158)    |              | Sample size > 220 (n=134)  |              |
| Frequency of items per protocol         | 21.75 (18.25, 24.79)          | 21.13 (4.85) | 24.92 (22.81, 26.42)       | 24.33 (2.98) | 25.04 (22.17, 27.06)          | 23.98 (4.38) | 25.33 (23.06, 27.06)       | 24.88 (3.21) |
| <b>Proportion of items per protocol</b> | 0.66 (0.55, 0.75)             | 0.64 (0.15)  | 0.76 (0.69, 0.80)          | 0.74 (0.09)  | 0.76 (0.67, 0.82)             | 0.73 (0.13)  | 0.77 (0.70, 0.82)          | 0.75 (0.10)  |
|                                         | Single centre trial (n=47)    |              | Multicentre trial (n=210)  |              | Single centre trial (n=77)    |              | Multicentre trial (n=215)  |              |
| Frequency of items per protocol         | 18.79 (16.00, 22.67)          | 19.04 (5.03) | 24.42 (21.75, 26.25)       | 23.73 (3.53) | 24.67 (20.00, 27.17)          | 23.09 (5.08) | 25.25 (23.29, 27.04)       | 24.87 (3.28) |
| <b>Proportion of items per protocol</b> | 0.57 (0.48, 0.69)             | 0.58 (0.15)  | 0.74 (0.66, 0.80)          | 0.72 (0.11)  | 0.75 (0.61, 0.82)             | 0.70 (0.15)  | 0.77 (0.71, 0.82)          | 0.75 (0.10)  |
|                                         | No CTU or CRO support (n=108) |              | CTU or CRO support (n=149) |              | No CTU or CRO support (n=130) |              | CTU or CRO support (n=162) |              |
| Frequency of items per protocol         | 21.71 (18.31, 24.19)          | 20.92 (4.71) | 24.92 (22.58, 26.42)       | 24.29 (3.22) | 24.08 (20.21, 26.25)          | 22.92 (4.33) | 26.12 (23.92, 27.65)       | 25.59 (3.05) |
| <b>Proportion of items per protocol</b> | 0.66 (0.55, 0.73)             | 0.63 (0.14)  | 0.76 (0.68, 0.80)          | 0.74 (0.10)  | 0.73 (0.61, 0.80)             | 0.69 (0.13)  | 0.79 (0.72, 0.84)          | 0.78 (0.09)  |

Abbreviations: SPIRIT, Standard Protocol Items: Recommendations for Interventional Trials; RCT, randomised clinical trial; CTU, clinical trials unit; CRO, contract research organization; IQR, interquartile range; SD, standard deviation

Supplementary Table 3: Adherence to SPIRIT items in RCT protocols by country and sponsorship

| Characteristic                   | 2012                 |              |                      |              |                      |              | 2016                 |              |                      |              |                      |              |
|----------------------------------|----------------------|--------------|----------------------|--------------|----------------------|--------------|----------------------|--------------|----------------------|--------------|----------------------|--------------|
|                                  | Sponsorship          |              |                      |              | Total 2012 (n=257)   |              | Sponsorship          |              |                      |              | Total 2016 (n=292)   |              |
|                                  | Industry (n=138)     |              | Investigator (n=119) |              |                      |              | Industry (n=130)     |              | Investigator (n=162) |              |                      |              |
|                                  | median (IQR)         | mean (SD)    |
| <b>Switzerland</b>               | Industry (n=91)      |              | Investigator (n=89)  |              | Total 2012 (n=180)   |              | Industry (n=86)      |              | Investigator (n=131) |              | Total 2016 (n=217)   |              |
| Frequency of items per protocol  | 26.08 (24.71, 27.08) | 25.52 (2.71) | 21.42 (18.33, 24.25) | 20.99 (4.61) | 24.49 (21.15, 26.44) | 23.28 (4.39) | 25.98 (24.35, 27.08) | 25.25 (3.05) | 26.08 (22.50, 27.67) | 24.81 (4.02) | 26.04 (23.50, 27.33) | 24.98 (3.67) |
| Proportion of items per protocol | 0.79 (0.75, 0.82)    | 0.77 (0.08)  | 0.65 (0.56, 0.74)    | 0.64 (0.14)  | 0.74 (0.64, 0.80)    | 0.71 (0.13)  | 0.79 (0.74, 0.82)    | 0.77 (0.09)  | 0.79 (0.68, 0.84)    | 0.75 (0.12)  | 0.79 (0.71, 0.83)    | 0.76 (0.11)  |
| <b>Germany</b>                   | Industry (n=26)      |              | Investigator (n=11)  |              | Total 2012 (n=37)    |              | Industry (n=27)      |              | Investigator (n=11)  |              | Total 2016 (n=38)    |              |
| Frequency of items per protocol  | 24.58 (22.96, 25.75) | 24.36 (1.88) | 19.50 (17.17, 23.54) | 19.28 (5.14) | 24.17 (21.92, 25.08) | 22.85 (3.92) | 23.92 (22.38, 25.25) | 22.74 (4.21) | 22.42 (19.38, 24.63) | 22.07 (3.76) | 23.58 (21.09, 25.21) | 22.55 (4.04) |
| Proportion of items per protocol | 0.75 (0.70, 0.78)    | 0.74 (0.06)  | 0.59 (0.52, 0.71)    | 0.58 (0.16)  | 0.73 (0.66, 0.76)    | 0.69 (0.12)  | 0.73 (0.68, 0.77)    | 0.69 (0.13)  | 0.68 (0.59, 0.75)    | 0.67 (0.11)  | 0.72 (0.64, 0.76)    | 0.68 (0.12)  |
| <b>Canada</b>                    | Industry (n=21)      |              | Investigator (n=19)  |              | Total 2012 (n=40)    |              | Industry (n=17)      |              | Investigator (n=20)  |              | Total 2016 (n=37)    |              |
| Frequency of items per protocol  | 22.83 (21.42, 24.42) | 22.56 (2.70) | 19.42 (18.17, 22.29) | 19.48 (3.45) | 21.75 (19.22, 23.15) | 21.10 (3.41) | 25.92 (23.67, 27.08) | 25.37 (1.93) | 20.04 (17.98, 23.65) | 20.71 (4.45) | 23.67 (20.00, 26.00) | 22.85 (4.20) |
| Proportion of items per protocol | 0.69 (0.65, 0.74)    | 0.68 (0.08)  | 0.59 (0.55, 0.68)    | 0.59 (0.10)  | 0.66 (0.58, 0.70)    | 0.64 (0.10)  | 0.79 (0.72, 0.82)    | 0.77 (0.06)  | 0.61 (0.55, 0.72)    | 0.63 (0.14)  | 0.72 (0.61, 0.79)    | 0.69 (0.13)  |



Abbreviations: SPIRIT, Standard Protocol Items: Recommendations for Interventional Trials; RCT, randomised clinical trial; IQR, interquartile range; SD, standard deviation

Supplementary Table 4: Sensitivity analyses of calculating the adherence to SPIRIT items for RCT protocols by sponsorship

| Characteristic                                                | 2012                       |              |                                |              |                      |              | 2016                       |              |                                |              |                      |              |
|---------------------------------------------------------------|----------------------------|--------------|--------------------------------|--------------|----------------------|--------------|----------------------------|--------------|--------------------------------|--------------|----------------------|--------------|
|                                                               | Industry-sponsored (n=138) |              | Investigator-sponsored (n=119) |              | Total 2012 (n=257)   |              | Industry-sponsored (n=130) |              | Investigator-sponsored (n=162) |              | Total 2016 (n=292)   |              |
|                                                               | median (IQR)               | mean (SD)    | median (IQR)                   | mean (SD)    | median (IQR)         | mean (SD)    | median (IQR)               | mean (SD)    | median (IQR)                   | mean (SD)    | median (IQR)         | mean (SD)    |
| <b>Major Item approach (simple) NA=0</b>                      |                            |              |                                |              |                      |              |                            |              |                                |              |                      |              |
| Frequency of items per protocol                               | 18.00 (17.00, 20.00)       | 18.04 (2.99) | 13.00 (11.00, 16.00)           | 13.48 (4.27) | 17.00 (13.00, 19.00) | 15.93 (4.29) | 18.00 (16.00, 20.00)       | 18.12 (3.44) | 17.00 (14.00, 19.00)           | 16.40 (4.08) | 18.00 (15.00, 20.00) | 17.16 (3.89) |
| Proportion of items per protocol                              | 0.56 (0.52, 0.61)          | 0.55 (0.09)  | 0.42 (0.33, 0.50)              | 0.41 (0.13)  | 0.52 (0.41, 0.58)    | 0.49 (0.13)  | 0.56 (0.50, 0.62)          | 0.56 (0.10)  | 0.53 (0.42, 0.59)              | 0.51 (0.12)  | 0.55 (0.47, 0.61)    | 0.53 (0.12)  |
| <b>Major Item approach (simple) NA=1</b>                      |                            |              |                                |              |                      |              |                            |              |                                |              |                      |              |
| Frequency of items per protocol                               | 22.00 (20.00, 23.00)       | 21.14 (3.20) | 16.00 (14.00, 19.00)           | 16.39 (4.76) | 20.00 (16.00, 22.00) | 18.95 (4.64) | 22.00 (20.00, 24.00)       | 21.25 (3.68) | 21.00 (17.00, 24.00)           | 20.19 (4.73) | 21.00 (18.00, 24.00) | 20.66 (4.32) |
| Proportion of items per protocol                              | 0.67 (0.61, 0.70)          | 0.64 (0.10)  | 0.48 (0.42, 0.58)              | 0.50 (0.14)  | 0.61 (0.48, 0.67)    | 0.57 (0.14)  | 0.67 (0.61, 0.73)          | 0.64 (0.11)  | 0.64 (0.52, 0.73)              | 0.61 (0.14)  | 0.64 (0.55, 0.73)    | 0.63 (0.13)  |
| <b>Major item approach (allowing for partial credit) NA=0</b> |                            |              |                                |              |                      |              |                            |              |                                |              |                      |              |
| Frequency of items per protocol                               | 24.75 (22.75, 26.17)       | 24.22 (2.86) | 19.47 (16.59, 22.27)           | 19.19 (4.91) | 22.87 (19.29, 25.42) | 21.88 (4.68) | 24.50 (22.40, 26.21)       | 23.89 (3.64) | 23.92 (19.85, 25.83)           | 22.72 (4.44) | 24.25 (21.25, 26.08) | 23.24 (4.14) |

|                                                               |                      |              |                      |              |                      |              |                      |              |                      |              |                      |              |
|---------------------------------------------------------------|----------------------|--------------|----------------------|--------------|----------------------|--------------|----------------------|--------------|----------------------|--------------|----------------------|--------------|
| Proportion of items per protocol                              | 0.76 (0.70, 0.80)    | 0.74 (0.08)  | 0.60 (0.51, 0.69)    | 0.59 (0.15)  | 0.71 (0.60, 0.78)    | 0.67 (0.14)  | 0.76 (0.69, 0.80)    | 0.73 (0.11)  | 0.74 (0.60, 0.80)    | 0.70 (0.14)  | 0.74 (0.66, 0.80)    | 0.72 (0.13)  |
| <b>Major item approach (allowing for partial credit) NA=1</b> |                      |              |                      |              |                      |              |                      |              |                      |              |                      |              |
| Frequency of items per protocol                               | 25.46 (23.58, 26.50) | 24.85 (2.77) | 21.25 (18.25, 23.67) | 20.59 (4.52) | 23.67 (20.67, 26.17) | 22.88 (4.25) | 25.33 (23.67, 26.91) | 24.75 (3.35) | 25.00 (21.24, 27.31) | 24.12 (4.29) | 25.25 (22.50, 27.08) | 24.40 (3.90) |
| Proportion of items per protocol                              | 0.77 (0.71, 0.80)    | 0.75 (0.08)  | 0.64 (0.55, 0.72)    | 0.62 (0.14)  | 0.72 (0.63, 0.79)    | 0.69 (0.13)  | 0.77 (0.72, 0.82)    | 0.75 (0.10)  | 0.76 (0.64, 0.83)    | 0.73 (0.13)  | 0.77 (0.68, 0.82)    | 0.74 (0.12)  |
| <b>All item approach NA=0</b>                                 |                      |              |                      |              |                      |              |                      |              |                      |              |                      |              |
| Frequency of items per protocol                               | 43.00 (40.25, 46.00) | 42.38 (5.26) | 35.00 (30.00, 40.00) | 34.57 (8.33) | 41.00 (35.00, 44.00) | 38.76 (7.87) | 42.00 (40.00, 45.75) | 41.65 (6.46) | 41.00 (35.00, 45.00) | 39.69 (7.91) | 42.00 (37.75, 45.00) | 40.57 (7.35) |
| Proportion of items per protocol                              | 0.73 (0.69, 0.78)    | 0.73 (0.08)  | 0.62 (0.53, 0.70)    | 0.60 (0.14)  | 0.70 (0.61, 0.76)    | 0.67 (0.13)  | 0.73 (0.68, 0.78)    | 0.71 (0.11)  | 0.73 (0.62, 0.79)    | 0.70 (0.13)  | 0.73 (0.65, 0.78)    | 0.71 (0.12)  |
| <b>All item approach NA=1</b>                                 |                      |              |                      |              |                      |              |                      |              |                      |              |                      |              |
| Frequency of items per protocol                               | 49.00 (46.00, 51.75) | 48.27 (4.71) | 43.00 (37.00, 46.00) | 41.42 (7.80) | 46.00 (42.00, 50.00) | 45.10 (7.18) | 48.50 (45.00, 51.00) | 47.45 (5.94) | 49.00 (42.25, 52.00) | 46.95 (7.42) | 49.00 (44.00, 52.00) | 47.17 (6.80) |
| Proportion of items per protocol                              | 0.77 (0.72, 0.81)    | 0.75 (0.07)  | 0.67 (0.58, 0.72)    | 0.65 (0.12)  | 0.72 (0.66, 0.78)    | 0.70 (0.11)  | 0.76 (0.70, 0.80)    | 0.74 (0.09)  | 0.77 (0.66, 0.81)    | 0.73 (0.12)  | 0.77 (0.69, 0.81)    | 0.74 (0.11)  |

Abbreviations: IQR, interquartile range; NA, not applicable (SPIRIT items with rating "not applicable"); SD, standard deviation

**Supplementary Table 5: Adherence to individual SPIRIT items by year and sponsorship**

| Variable                                                                     | Spirit Item Number | 2012                         |                                  |                    | 2016                         |                                  |                    |
|------------------------------------------------------------------------------|--------------------|------------------------------|----------------------------------|--------------------|------------------------------|----------------------------------|--------------------|
|                                                                              |                    | Industry sponsorship (n=138) | Investigator sponsorship (n=119) | Total 2012 (n=257) | Industry sponsorship (n=130) | Investigator sponsorship (n=162) | Total 2016 (n=292) |
| Basic study design in Title                                                  | 1                  | 116 (84.1%)                  | 47 (39.5%)                       | 163 (63.4%)        | 108 (83.1%)                  | 57 (35.2%)                       | 165 (56.5%)        |
| Trial registration                                                           | 2                  | 109 (79.0%)                  | 43 (36.1%)                       | 152 (59.1%)        | 111 (85.4%)                  | 125 (77.2%)                      | 236 (80.8%)        |
| Protocol version, number and date                                            | 3                  | 131 (94.9%)                  | 100 (84.0%)                      | 231 (89.9%)        | 127 (97.7%)                  | 155 (95.7%)                      | 282 (96.6%)        |
| Funding sources                                                              | 4                  | 123 (89.1%)                  | 70 (58.8%)                       | 193 (75.1%)        | 122 (93.8%)                  | 120 (74.1%)                      | 242 (82.9%)        |
| Names of protocol contributors/ authors                                      | 5a                 | 30 (21.7%)                   | 36 (30.3%)                       | 66 (25.7%)         | 20 (15.4%)                   | 30 (18.5%)                       | 50 (17.1%)         |
| Name and contact details of sponsor                                          | 5b                 | 110 (79.7%)                  | 82 (68.9%)                       | 192 (74.7%)        | 91 (70.0%)                   | 136 (84.0%)                      | 227 (77.7%)        |
| Role of sponsor and funder in trial                                          | 5c                 | 112 (81.2%)                  | 39 (32.8%)                       | 151 (58.8%)        | 70 (53.8%)                   | 43 (26.5%)                       | 113 (38.7%)        |
| Steering Committee General Membership and Role                               | 5d                 | 125 (90.6%)                  | 107 (89.9)                       | 232 (90.3%)        | 113 (86.9%)                  | 156 (96.3%)                      | 269 (92.1%)        |
| Of which Not Applicable                                                      |                    | 94 (75.2%)                   | 72 (67.3%)                       | 164 (71.6%)        | 90 (79.6%)                   | 109 (69.9%)                      | 199 (74.0%)        |
| Research question described and justified                                    | 6a                 | 25 (18.1%)                   | 31 (26.1%)                       | 56 (21.8%)         | 22 (16.9%)                   | 54 (33.3%)                       | 76 (26.0%)         |
| Comparator choice explained                                                  | 6b                 | 108 (78.3%)                  | 88 (73.9%)                       | 196 (76.3%)        | 105 (80.8%)                  | 137 (84.6%)                      | 242 (82.9%)        |
| Specific objectives described                                                | 7                  | 133 (96.4%)                  | 107 (89.9%)                      | 240 (93.4%)        | 125 (96.2%)                  | 149 (92.0%)                      | 274 (93.8%)        |
| Trial design described                                                       | 8                  | 127 (92.0%)                  | 80 (67.2%)                       | 207 (80.5%)        | 115 (88.5%)                  | 132 (81.5%)                      | 247 (84.6%)        |
| Countries where data will be collected listed                                | 9                  | 71 (51.4%)                   | 94 (79.0%)                       | 165 (64.2%)        | 19 (14.6%)                   | 144 (88.9%)                      | 163 (55.8%)        |
| Eligibility criteria for trial participants                                  | 10                 | 138 (100.0%)                 | 116 (97.5%)                      | 254 (98.8%)        | 130 (100.0%)                 | 162 (100.0%)                     | 292 (100.0%)       |
| Eligibility criteria for study centres and who will perform the intervention | 10                 | 15 (10.9%)                   | 58 (48.7%)                       | 73 (28.4%)         | 12 (9.2%)                    | 98 (60.5%)                       | 110 (37.7%)        |

|                                                        |     |              |             |             |             |             |             |
|--------------------------------------------------------|-----|--------------|-------------|-------------|-------------|-------------|-------------|
| Of which Not Applicable                                |     | 1 (6.7%)     | 39 (67.2%)  | 40 (54.8%)  | 2 (16.7%)   | 68 (69.4%)  | 70 (63.6%)  |
| Individuals administering interventions (non-drug)     | 10  | 131 (94.9%)  | 93 (78.2%)  | 224 (87.2%) | 120 (92.3%) | 131 (80.9%) | 251 (86.0%) |
| Of which Not Applicable                                |     | 119 (90.8%)  | 49 (52.7%)  | 168 (75.0%) | 106 (88.3%) | 65 (49.6%)  | 171 (68.1%) |
| Generic Name, Dose and Schedule of intervention        | 11a | 135 (97.8%)  | 118 (99.2%) | 253 (98.4%) | 130 (100%)  | 161 (99.4%) | 291 (99.7%) |
| Of which Not Applicable                                |     | 16 (11.9%)   | 63 (53.4%)  | 79 (31.2%)  | 19 (14.6%)  | 95 (59.0%)  | 114 (39.2%) |
| Setting of intervention administration                 | 11a | 129 (93.5%)  | 103 (86.6%) | 232 (90.3%) | 118 (90.8%) | 147 (90.7%) | 265 (90.8%) |
| Of which Not Applicable                                |     | 118 (91.5%)  | 49 (47.6%)  | 167 (72.0%) | 106 (89.8%) | 62 (42.2%)  | 168 (63.4%) |
| Criteria for modifications of interventions            | 11b | 114 (82.6%)  | 85 (71.4%)  | 199 (77.4%) | 111 (85.4%) | 128 (79.0%) | 239 (81.8%) |
| Of which Not Applicable                                |     | 13 (11.4%)   | 32 (37.7%)  | 45 (22.6%)  | 10 (9.0%)   | 35 (27.3%)  | 45 (18.8%)  |
| Strategies to improve or monitoring of adherence       | 11c | 123 (89.1%)  | 95 (79.8%)  | 218 (84.8%) | 107 (82.3%) | 144 (88.9%) | 251 (86.0%) |
| Of which Not Applicable                                |     | 44 (35.8%)   | 66 (69.5%)  | 110 (50.5%) | 33 (30.8%)  | 78 (54.2%)  | 111 (44.2%) |
| Permitted concomitant care                             | 11d | 130 (94.2%)  | 61 (51.3%)  | 191 (74.3%) | 124 (95.4%) | 112 (69.1%) | 236 (80.8%) |
| Primary Outcome: Specific measurement variable         | 12  | 138 (100%)   | 113 (95.0%) | 251 (97.7%) | 129 (99.2%) | 153 (94.4%) | 282 (96.6%) |
| Of which Not Applicable                                |     | 1 (0.7%)     | 0 (0%)      | 1 (0.4%)    | 0 (0%)      | 0 (0%)      | 0 (0%)      |
| Primary Outcome: Analysis metric                       | 12  | 132 (95.7%)  | 101 (84.9%) | 233 (90.7%) | 124 (95.4%) | 140 (86.4%) | 264 (90.4%) |
| Of which Not Applicable                                |     | 3 (2.3%)     | 0 (0%)      | 3 (1.3%)    | 1 (0.8%)    | 0 (0%)      | 1 (0.4%)    |
| Primary Outcomes: time point of measurement            | 12  | 132 (95.7%)  | 105 (88.2%) | 237 (92.2%) | 124 (95.4%) | 149 (92.0%) | 273 (93.5%) |
| Of which Not Applicable                                |     | 40 (30.3%)   | 20 (19.1%)  | 60 (25.3%)  | 26 (21.0%)  | 20 (13.4%)  | 46 (16.9%)  |
| Participant timeline                                   | 13  | 136 (98.6%)  | 113 (95.0%) | 249 (96.9%) | 130 (100%)  | 154 (95.1%) | 284 (97.3%) |
| Sample size: Estimated number                          | 14  | 138 (100.0%) | 116 (97.5%) | 254 (98.8%) | 128 (98.5%) | 161 (99.4%) | 289 (99.0%) |
| Sample size: Outcome used for samples size calculation | 14  | 135 (97.8%)  | 107 (89.9%) | 242 (94.2%) | 127 (97.7%) | 148 (91.4%) | 275 (94.2%) |
| Of which Not Applicable                                |     | 7 (5.2%)     | 3 (2.8%)    | 10 (4.1%)   | 4 (3.2%)    | 7 (4.7%)    | 11 (4.0%)   |

|                                                                       |     |             |             |             |             |             |             |
|-----------------------------------------------------------------------|-----|-------------|-------------|-------------|-------------|-------------|-------------|
| Sample size:<br>Assumed values for outcome                            | 14  | 122 (88.4%) | 89 (74.8%)  | 211 (82.1%) | 111 (85.4%) | 116 (71.6%) | 227 (77.7%) |
| Of which Not Applicable                                               |     | 6 (4.9%)    | 5 (5.6%)    | 11 (5.2%)   | 4 (3.6%)    | 7 (6.0%)    | 11 (4.9%)   |
| Sample size:<br>Alpha value                                           | 14  | 131 (94.9%) | 106 (89.1%) | 237 (92.2%) | 126 (96.9%) | 150 (92.6%) | 276 (94.5%) |
| Of which Not Applicable                                               |     | 7 (5.3%)    | 3 (2.8%)    | 10 (4.2%)   | 4 (3.2%)    | 7 (4.7%)    | 11 (4.0%)   |
| Sample size:<br>Statistical Power                                     | 14  | 134 (97.1%) | 111 (93.3%) | 245 (95.3%) | 128 (98.5%) | 153 (94.4%) | 281 (96.2%) |
| Of which Not Applicable                                               |     | 7 (5.2%)    | 3 (2.7%)    | 10 (4.1%)   | 4 (3.1%)    | 7 (4.6%)    | 11 (3.9%)   |
| Sample size:<br>Rationale sample size if not derived<br>statistically | 14  | 137 (99.3%) | 110 (92.4%) | 247 (96.1%) | 127 (97.7%) | 158 (97.5%) | 285 (97.6%) |
| Of which Not Applicable                                               |     | 130 (94.9%) | 110 (100%)  | 240 (97.2%) | 123 (96.9%) | 155 98.1%)  | 278 (97.5%) |
| Location of<br>participant recruitment                                | 15  | 24 (17.4%)  | 78 (65.5%)  | 102 (39.7%) | 17 (13.1%)  | 112 (69.1%) | 129 (44.2%) |
| Person(s) who<br>will recruit participants                            | 15  | 40 (29.0%)  | 52 (43.7%)  | 92 (35.8%)  | 33 (25.4%)  | 91 (56.2%)  | 124 (42.5%) |
| Expected recruitment rate                                             | 15  | 37 (26.8%)  | 52 (43.7%)  | 89 (34.6%)  | 13 (10.0%)  | 39 (24.1%)  | 52 (17.8%)  |
| Method for generation<br>of random sequence                           | 16a | 89 (64.5%)  | 63 (52.9%)  | 152 (59.1%) | 68 (52.3%)  | 109 (67.3%) | 177 (60.6%) |
| Allocation concealment<br>mechanism                                   | 16b | 126 (91.3%) | 80 (67.2%)  | 206 (80.2%) | 113 (86.9%) | 130 (80.2%) | 243 (83.2%) |
| Of which Not Applicable                                               |     | 8 (6.4%)    | 3 (3.8%)    | 11 (5.3%)   | 1 (0.9%)    | 3 (2.3%)    | 4 (1.7%)    |
| Person who will<br>enroll/assign participants                         | 16c | 59 (42.8%)  | 44 (37.0%)  | 103 (40.1%) | 50 (38.5%)  | 79 (48.8%)  | 129 (44.2%) |
| Of which Not Applicable                                               |     | 0 (0%)      | 2 (4.6%)    | 2 (1.9%)    | 1 (2%)      | 1 (1.3%)    | 2 (1.6%)    |
| Blinding status<br>of participants                                    | 17a | 133 (96.4%) | 97 (81.5%)  | 230 (89.5%) | 128 (98.5%) | 148 (91.4%) | 276 (94.5%) |
| Blinding status<br>of care providers                                  | 17a | 134 (97.1%) | 97 (81.5%)  | 231 (89.9%) | 127 (97.7%) | 148 (91.4%) | 275 (94.2%) |
| Blinding status<br>of outcome assessors                               | 17a | 103 (74.6%) | 71 (59.7%)  | 174 (67.7%) | 94 (72.3%)  | 105 (64.8%) | 199 (68.2%) |
| Conditions when<br>unblinding is permissible                          | 17b | 127 (92.0%) | 92 (77.3%)  | 219 (85.2%) | 120 (82.3%) | 142 (87.7%) | 262 (89.7%) |
| Of which Not Applicable                                               |     | 34 (26.8%)  | 66 (71.7%)  | 100 (45.7%) | 36 (30%)    | 91 (64.1%)  | 127 (48.5%) |

|                                                                                              |     |             |             |             |             |             |             |
|----------------------------------------------------------------------------------------------|-----|-------------|-------------|-------------|-------------|-------------|-------------|
| Personnel who will collect data                                                              | 18a | 58 (42.0%)  | 52 (43.7%)  | 110 (42.8%) | 61 (46.9%)  | 96 (59.3%)  | 157 (53.8%) |
| Strategies to promote participant retention and complete follow-up                           | 18b | 84 (60.9%)  | 34 (28.6%)  | 118 (45.9%) | 80 (61.5%)  | 64 (39.5%)  | 144 (49.3%) |
| Data entry and coding                                                                        | 19  | 106 (76.8%) | 64 (53.8%)  | 170 (66.1%) | 102 (78.5%) | 117 (72.2%) | 219 (75.0%) |
| Main analysis for primary outcome                                                            | 20a | 131 (94.9%) | 96 (80.7%)  | 227 (88.3%) | 121 (93.1%) | 132 (81.5%) | 253 (86.6%) |
| Definition of subgroup categories                                                            | 20b | 117 (84.8%) | 98 (82.4%)  | 215 (83.7%) | 108 (83.1%) | 148 (91.4%) | 256 (87.7%) |
| Of which Not Applicable                                                                      |     | 60 (51.3%)  | 79 (80.6%)  | 139 (64.7%) | 63 (58.3%)  | 116 (78.4%) | 179 (69.9%) |
| Definition of analysis population                                                            | 20c | 125 (90.6%) | 49 (41.2%)  | 174 (67.7%) | 120 (92.3%) | 96 (59.3%)  | 216 (74.0%) |
| DMC is planned or why it is not planned                                                      | 21a | 102 (73.9%) | 49 (41.2%)  | 151 (58.8%) | 97 (74.6%)  | 72 (44.4%)  | 169 (57.9%) |
| Who has authority to stop the trial                                                          | 21b | 111 (80.4%) | 73 (61.3%)  | 184 (71.6%) | 111 (85.4%) | 112 (69.1%) | 223 (76.4%) |
| Anticipated/unanticipated adverse events collection                                          | 22  | 136 (98.6%) | 91 (76.5%)  | 227 (88.3%) | 127 (97.7%) | 138 (85.2%) | 265 (90.8%) |
| Audits/external monitoring described                                                         | 23  | 106 (76.8%) | 49 (41.2%)  | 155 (60.3%) | 109 (83.8%) | 112 (69.1%) | 221 (75.7%) |
| Of which Not Applicable                                                                      |     | 0 (0%)      | 3 (6.1%)    | 3 (1.9%)    | 3 (2.8%)    | 15 (13.4%)  | 18 (8.2%)   |
| Research ethics approval                                                                     | 24  | 138 (100%)  | 118 (100%)  | 256 (100%)  | 130 (100%)  | 162 (100%)  | 292 (100%)  |
| Process for making amendments described                                                      | 25  | 106 (76.8%) | 48 (40.3%)  | 154 (59.9%) | 103 (79.2%) | 121 (74.7%) | 224 (76.7%) |
| Informed Consent process described                                                           | 26a | 119 (86.2%) | 77 (64.7%)  | 196 (76.3%) | 110 (84.6%) | 139 (85.8%) | 249 (85.3%) |
| Process to obtain additional consent for collection and use of data and biological specimens | 26b | 123 (89.1%) | 103 (86.6%) | 226 (87.9%) | 111 (85.4%) | 151 (93.2%) | 262 (89.7%) |
| Of which Not Applicable                                                                      |     | 70 (56.9%)  | 87 (84.5%)  | 157 (69.5%) | 65 (58.6%)  | 126 (83.4%) | 191 (72.9%) |
| Confidentiality of data                                                                      | 27  | 125 (90.6%) | 88 (73.9%)  | 213 (82.9%) | 114 (87.7%) | 144 (88.9%) | 258 (88.4%) |
| Declaration of Interests                                                                     | 28  | 54 (39.1%)  | 27 (22.7%)  | 81 (31.5%)  | 94 (72.3%)  | 88 (54.3%)  | 182 (62.3%) |
| Who will have access to full dataset                                                         | 29  | 29 (21.0%)  | 23 (19.3%)  | 52 (20.2%)  | 37 (28.5%)  | 56 (34.6%)  | 93 (31.8%)  |

|                                                                             |     |             |             |             |             |             |             |
|-----------------------------------------------------------------------------|-----|-------------|-------------|-------------|-------------|-------------|-------------|
| Ancillary and post-trial care                                               | 30  | 61 (44.2%)  | 39 (32.8%)  | 100 (38.9%) | 50 (38.5%)  | 44 (27.2%)  | 94 (32.2%)  |
| Plans to disseminate trial results to key stakeholders/publication provided | 31a | 72 (52.2%)  | 51 (42.9%)  | 123 (47.9%) | 77 (59.2%)  | 129 (79.6%) | 206 (70.5%) |
| Authorship eligibility criteria                                             | 31b | 50 (36.2%)  | 30 (25.2%)  | 80 (31.1%)  | 41 (31.5%)  | 57 (35.2%)  | 98 (33.6%)  |
| Plans for granting access to full trial protocol                            | 31c | 7 (5.1%)    | 2 (1.7%)    | 9 (3.5%)    | 4 (3.1%)    | 13 (8.0%)   | 17 (5.8%)   |
| Consent forms provided                                                      | 32  | 133 (96.4%) | 118 (99.2%) | 251 (97.7%) | 125 (96.2%) | 157 (96.9%) | 282 (96.6%) |
| Details of specimen collection                                              | 33  | 126 (91.3%) | 99 (83.2)   | 225 (87.5%) | 120 (92.3%) | 152 (93.8%) | 272 (93.2%) |
| Of which Not Applicable                                                     |     | 35 (27.8%)  | 61 (61.6%)  | 96 (42.7%)  | 53 (44.2%)  | 109 (71.7%) | 162 (59.6%) |



**Supplementary Table 6: Adherence to SPIRIT items in Investigator-sponsored protocols that improved by 10% or more**

|                                                                              |                    | 2012        | 2016        |
|------------------------------------------------------------------------------|--------------------|-------------|-------------|
| Variable                                                                     | Spirit Item Number | Yes         | Yes         |
| Trial registration                                                           | 2                  | 43 (36.1%)  | 125 (77.2%) |
| Protocol version, number and date                                            | 3                  | 100 (84.0%) | 155 (95.7%) |
| Funding sources                                                              | 4                  | 70 (58.8%)  | 120 (74.1%) |
| Name and contact details of sponsor                                          | 5b                 | 82 (68.9%)  | 136 (84.0%) |
| Comparator choice explained                                                  | 6b                 | 88 (73.9%)  | 137 (84.6%) |
| Trial design described                                                       | 8                  | 80 (67.2%)  | 132 (81.5%) |
| Eligibility criteria for study centres and who will perform the intervention | 10                 | 58 (48.7%)  | 98 (60.5%)  |
| Of which Not Applicable                                                      |                    | 39 (67.2%)  | 68 (69.4%)  |
| Permitted concomitant care                                                   | 11d                | 61 (51.3%)  | 112 (69.1%) |
| Person(s) who will recruit participants                                      | 15                 | 52 (43.7%)  | 91 (56.2%)  |
| Method for generation of random sequence                                     | 16a                | 63 (52.9%)  | 109 (67.3%) |
| Allocation concealment mechanism                                             | 16b                | 80 (67.2%)  | 130 (80.3%) |
| Of which Not Applicable                                                      |                    | 3 (3.8%)    | 3 (2.3%)    |
| Person who will enroll/assign participants                                   | 16c                | 44 (37.0%)  | 79 (48.8%)  |
| Of which Not Applicable                                                      |                    | 2 (1.4%)    | 1 (1.3%)    |
| Personnel who will collect data                                              | 18a                | 52 (43.7%)  | 96 (59.3%)  |
| Strategies to promote participant retention and complete follow-up           | 18b                | 34 (28.6%)  | 64 (39.5%)  |
| Data entry and coding                                                        | 19                 | 64 (53.8%)  | 117 (72.2%) |
| Definition of analysis population                                            | 20c                | 49 (41.2%)  | 96 (59.3%)  |
| Audits/external monitoring described                                         | 23                 | 49 (41.2%)  | 112 (69.1%) |
| Of which Not Applicable                                                      |                    | 3 (6.1%)    | 15 (13.4%)  |
| Process for making amendments described                                      | 25                 | 48 (40.3%)  | 121 (74.7%) |
| Informed Consent process described                                           | 26a                | 77 (64.7%)  | 139 (85.8%) |
| Confidentiality of data                                                      | 27                 | 88 (73.9%)  | 144 (88.9%) |
| Declaration of Interests                                                     | 28                 | 27 (22.7%)  | 88 (54.3%)  |
| Who will have access to full dataset                                         | 29                 | 23 (19.3%)  | 56 (34.6%)  |
| Plans to disseminate trial results to key stakeholders/publication provided  | 31a                | 51 (42.9%)  | 129 (79.6%) |

|                                 |     |            |             |
|---------------------------------|-----|------------|-------------|
| Authorship eligibility criteria | 31b | 30 (25.2%) | 57 (35.2%)  |
| Details of specimen collection  | 33  | 99 (83.2%) | 152 (93.8)  |
| Of which Not Applicable         |     | 61 (61.6%) | 109 (71.7%) |

Supplementary Table 7: Results from multivariable Beta and Logistic regressions for all approaches

| Approach                          | Independent Variable             | Beta Regression |            |         | Likelihood ratio |       | Logistic regression with Protocol as random effect |             |         | Likelihood ratio |       |
|-----------------------------------|----------------------------------|-----------------|------------|---------|------------------|-------|----------------------------------------------------|-------------|---------|------------------|-------|
|                                   |                                  | Odds Ratio      | CI         | p value | Chisq            | p     | Odds Ratio                                         | CI          | p value | Chisq            | p     |
| Major Item approach (simple) NA=0 | Sample size in 1000 increments   | 1.01            | 0.99- 1.03 | 0.235   | -                | -     | 1.00                                               | 0.98 – 1.02 | 0.747   | -                | -     |
|                                   | Multicentre study                | 1.29            | 1.17- 1.43 | <.001   | -                | -     | 1.21                                               | 1.08 – 1.36 | 0.001   | -                | -     |
|                                   | CTU or CRO support               | 1.35            | 1.25- 1.45 | <.001   | -                | -     | 1.42                                               | 1.29 – 1.56 | <.001   | -                | -     |
|                                   | Industry sponsorship             | 1.23            | 1.14- 1.34 | <.001   | -                | -     | 1.36                                               | 1.23 – 1.51 | <.001   | -                | -     |
|                                   | Year 2016                        | 1.25            | 1.16- 1.35 | <.001   | -                | -     | 1.26                                               | 1.15 – 1.38 | <.001   | -                | -     |
| Interaction term                  | Sponsorship:Year interaction     | 0.71            | 0.61- 0.81 | <.001   | 22.24            | <.001 | 0.69                                               | 0.58 – 0.83 | <.001   | 16.21            | <.001 |
|                                   | CTU/CRO support:Year interaction | 0.91            | 0.78- 1.05 | 0.190   | 1.72             | 0.190 | 0.87                                               | 0.73 – 1.04 | 0.118   | 2.43             | 0.119 |
| Major Item approach (simple) NA=1 | Sample size in 1000 increments   | 1.01            | 0.99- 1.03 | 0.233   | -                | -     | 0.99                                               | 0.97 – 1.02 | 0.654   | -                | -     |
|                                   | Multicentre study                | 1.22            | 1.08- 1.37 | 0.001   | -                | -     | 1.16                                               | 1.02 – 1.31 | 0.022   | -                | -     |
|                                   | CTU or CRO support               | 1.42            | 1.30- 1.55 | <.001   | -                | -     | 1.46                                               | 1.32 – 1.60 | <.001   | -                | -     |
|                                   | Industry sponsorship             | 1.23            | 1.11- 1.35 | <.001   | -                | -     | 1.34                                               | 1.21 – 1.50 | <.001   | -                | -     |
|                                   | Year 2016                        | 1.32            | 1.21- 1.43 | <.001   | -                | -     | 1.34                                               | 1.22 – 1.48 | <.001   | -                | -     |
| Interaction term                  | Sponsorship:Year interaction     | 0.64            | 0.55- 0.76 | <.001   | 26.27            | <.001 | 0.67                                               | 0.55 – 0.81 | <.001   | 17.32            | <.001 |
|                                   | CTU/CRO support:Year interaction | 0.99            | 0.83- 1.17 | 0.881   | 0.02             | 0.881 | 0.90                                               | 0.75 – 1.09 | 0.292   | 1.10             | 0.294 |

|                                                              |                                     |      |               |       |       |       |      |                 |       |       |       |
|--------------------------------------------------------------|-------------------------------------|------|---------------|-------|-------|-------|------|-----------------|-------|-------|-------|
| Major item approach<br>(allowing for partial<br>credit) NA=0 | Sample size in 1000 increments      | 1.01 | 0.99- 1.03    | 0.290 | -     | -     | -    | -               | -     | -     | -     |
|                                                              | Multicentre study                   | 1.22 | 1.08- 1.38    | 0.001 | -     | -     | -    | -               | -     | -     | -     |
|                                                              | CTU or CRO support                  | 1.43 | 1.31- 1.57    | <.001 | -     | -     | -    | -               | -     | -     | -     |
|                                                              | Industry sponsorship                | 1.25 | 1.13- 1.38    | <.001 | -     | -     | -    | -               | -     | -     | -     |
|                                                              | Year 2016                           | 1.33 | 1.21- 1.46    | <.001 | -     | -     | -    | -               | -     | -     | -     |
| Interaction term                                             | Sponsorship:Year interaction        | 0.60 | 0.50- 0.71    | <.001 | 31.48 | <.001 | -    | -               | -     | -     | -     |
|                                                              | CTU/CRO support:Year<br>interaction | 0.94 | 0.79- 1.13    | 0.515 | 0.42  | 0.515 | -    | -               | -     | -     | -     |
| Major item approach<br>(allowing for partial<br>credit) NA=1 | Sample size in 1000 increments      | 1.01 | 0.99- 1.03    | 0.389 | -     | -     | -    | -               | -     | -     | -     |
|                                                              | Multicentre study                   | 1.18 | 1.05- 1.33    | 0.006 | -     | -     | -    | -               | -     | -     | -     |
|                                                              | CTU or CRO support                  | 1.44 | 1.31- 1.57    | <.001 | -     | -     | -    | -               | -     | -     | -     |
|                                                              | Industry sponsorship                | 1.20 | 1.09- 1.33    | <.001 | -     | -     | -    | -               | -     | -     | -     |
|                                                              | Year 2016                           | 1.33 | 1.22- 1.45    | <.001 | -     | -     | -    | -               | -     | -     | -     |
| Interaction term                                             | Sponsorship:Year interaction        | 0.61 | 0.52- 0.73    | <.001 | 30.01 | <.001 | -    | -               | -     | -     | -     |
|                                                              | CTU/CRO support:Year<br>interaction | 0.98 | 0.82- 1.16    | 0.790 | 0.07  | 0.790 | -    | -               | -     | -     | -     |
| All item approach<br>NA=0                                    | Sample size in 1000 increments      | 1.02 | 1.00-<br>1.04 | 0.095 | -     | -     | 1.02 | 1.00 – 1.0<br>4 | 0.027 | -     | -     |
|                                                              | Multicentre study                   | 1.27 | 1.14- 1.43    | <.001 | -     | -     | 1.37 | 1.24 – 1.5<br>2 | <.001 | -     | -     |
|                                                              | CTU or CRO support                  | 1.39 | 1.28- 1.52    | <.001 | -     | -     | 1.33 | 1.23 – 1.4<br>4 | <.001 | -     | -     |
|                                                              | Industry sponsorship                | 1.14 | 1.03- 1.25    | 0.010 | -     | -     | 1.15 | 1.05 – 1.2<br>5 | 0.001 | -     | -     |
|                                                              | Year 2016                           | 1.25 | 1.15- 1.36    | <.001 | -     | -     | 1.20 | 1.11 – 1.2<br>9 | <.001 | -     | -     |
| Interaction term                                             | Sponsorship:Year interaction        | 0.63 | 0.53- 0.74    | <.001 | 29.29 | <.001 | 0.69 | 0.59 – 0.8<br>0 | <.001 | 24.20 | <.001 |

|                           |                                  |      |            |       |       |       |      |            |       |       |       |
|---------------------------|----------------------------------|------|------------|-------|-------|-------|------|------------|-------|-------|-------|
|                           | CTU/CRO support:Year interaction | 1.02 | 0.86- 1.21 | 0.841 | 0.04  | 0.842 | 0.97 | 0.83 – 1.1 | 0.643 | 0.22  | 0.643 |
| All item approach<br>NA=1 |                                  |      |            |       |       |       | 2    |            |       |       |       |
|                           | Sample size in 1000 increments   | 1.02 | 1.00- 1.04 | 0.131 | -     | -     | 4    | 1.00 – 1.0 | 0.118 | -     | -     |
|                           | Multicentre study                | 1.18 | 1.06- 1.31 | 0.003 | -     | -     | 5    | 1.07 – 1.3 | 0.002 | -     | -     |
|                           | CTU or CRO support               | 1.36 | 1.26- 1.48 | <.001 | -     | -     | 1    | 1.27 – 1.5 | <.001 | -     | -     |
|                           | Industry sponsorship             | 1.13 | 1.03- 1.23 | 0.010 | -     | -     | 5    | 1.04 – 1.2 | 0.006 | -     | -     |
|                           | Year 2016                        | 1.23 | 1.14- 1.34 | <.001 | -     | -     | 4    | 1.14 – 1.3 | <.001 | -     | -     |
| Interaction term          | Sponsorship:Year interaction     | 0.64 | 0.55- 0.75 | <.001 | 31.18 | <.001 | 4    | 0.54 – 0.7 | <.001 | 30.67 | <.001 |
|                           | CTU/CRO support:Year interaction | 1.05 | 0.90- 1.23 | 0.564 | 0.33  | 3     | 4    | 0.89 – 1.2 | 0.594 | 0.28  | 0.594 |

Abbreviations: CI, confidence interval

**Supplementary Table 8: Results from multivariable Beta regression, subset of Investigator-sponsored protocols**

| Approach                                                     | Independent Variable                     | Beta Regression |            |         | Likelihood ratio |       |
|--------------------------------------------------------------|------------------------------------------|-----------------|------------|---------|------------------|-------|
|                                                              |                                          | Odds Ratio      | CI         | p value | Chisq            | p     |
| Major item approach<br>(allowing for partial credit)<br>NA=0 | Sample size/1000                         | 1.01            | 0.95- 1.07 | 0.803   | -                | -     |
|                                                              | Multicentre                              | 1.21            | 1.05- 1.40 | 0.008   | -                | -     |
|                                                              | CTU or CRO support                       | 1.55            | 1.35- 1.77 | <.001   | -                | -     |
|                                                              | Year                                     | 1.61            | 1.42- 1.84 | <.001   | -                | -     |
|                                                              | Swiss cohort                             | 1.48            | 1.27- 1.74 | <.001   | -                | -     |
|                                                              | Interaction term<br>CTU/CRO support:Year | 1.02            | 0.79- 1.33 | 0.869   | 0.03             | 0.869 |
|                                                              | Swiss trials:Year                        | 1.39            | 1.03- 1.88 | 0.034   | 4.42             | 0.036 |
| Major item approach<br>(allowing for partial credit)<br>NA=1 | Sample size/1000                         | 1.00            | 0.95- 1.06 | 0.891   | -                | -     |
|                                                              | Multicentre                              | 1.19            | 1.03- 1.37 | 0.016   | -                | -     |
|                                                              | CTU or CRO support                       | 1.53            | 1.34- 1.75 | <.001   | -                | -     |
|                                                              | Year                                     | 1.60            | 1.41- 1.82 | <.001   | -                | -     |
|                                                              | Swiss cohort                             | 1.46            | 1.25- 1.70 | <.001   | -                | -     |
|                                                              | Interaction term<br>CTU/CRO support:Year | 1.08            | 0.83- 1.39 | 0.568   | 0.33             | 0.568 |
|                                                              | Swiss trials:Year                        | 1.39            | 1.03- 1.87 | 0.031   | 4.57             | 0.032 |

Abbreviations: CI, confidence interval

**Supplementary Table 9: Medical disciplines of included RCTs**

| Medical disciplines       | 2012             |                      |               | 2016                      |                      |               |            |
|---------------------------|------------------|----------------------|---------------|---------------------------|----------------------|---------------|------------|
|                           | Sponsorship      |                      |               | Sponsorship               |                      |               |            |
|                           | Industry (N=138) | Investigator (N=119) | Total (N=257) | Industry (N=130)          | Investigator (N=162) | Total (N=292) |            |
| Oncology                  | 30 (21.7%)       | 20 (16.8%)           | 50 (19.5%)    | Oncology                  | 30 (23.1%)           | 24 (14.8%)    | 54 (18.5%) |
| Surgery                   | 11 (8.0%)        | 27 (22.7%)           | 38 (14.8%)    | Cardiovascular            | 22 (16.9%)           | 14 (8.6%)     | 36 (12.3%) |
| Cardiovascular            | 19 (13.8%)       | 10 (8.4%)            | 29 (11.3%)    | Surgery                   | 6 (4.6%)             | 25 (15.4%)    | 31 (10.6%) |
| Neurology                 | 15 (10.9%)       | 5 (4.2%)             | 20 (7.8%)     | Neurology                 | 11 (8.5%)            | 12 (7.4%)     | 23 (7.9%)  |
| Respiratory               | 8 (5.8%)         | 6 (5.0%)             | 14 (5.4%)     | Psychiatry                | 1 (0.8%)             | 20 (12.3%)    | 21 (7.2%)  |
| Hematology                | 6 (4.3%)         | 6 (5.0%)             | 12 (4.7%)     | Respiratory               | 9 (6.9%)             | 7 (4.3%)      | 16 (5.5%)  |
| Infectious Disease        | 7 (5.1%)         | 4 (3.4%)             | 11 (4.3%)     | Gastroenterology          | 13 (10.0%)           | 1 (0.6%)      | 14 (4.8%)  |
| Anaesthetics              | 1 (0.7%)         | 9 (7.6%)             | 10 (3.9%)     | Rheumatology              | 12 (9.2%)            | 1 (0.6%)      | 13 (4.5%)  |
| Gastroenterology          | 8 (5.8%)         | 2 (1.7%)             | 10 (3.9%)     | Anaesthetics              | 0 (0.0%)             | 11 (6.8%)     | 11 (3.8%)  |
| Rheumatology              | 9 (6.5%)         | 1 (0.8%)             | 10 (3.9%)     | Endocrinology             | 5 (3.8%)             | 5 (3.1%)      | 10 (3.4%)  |
| Dermatology               | 8 (5.8%)         | 0 (0.0%)             | 8 (3.1%)      | Dentistry                 | 1 (0.8%)             | 6 (3.7%)      | 7 (2.4%)   |
| Endocrinology             | 1 (0.7%)         | 5 (4.2%)             | 6 (2.3%)      | Infectious Disease        | 4 (3.1%)             | 3 (1.9%)      | 7 (2.4%)   |
| Obstetrics and Gynecology | 1 (0.7%)         | 5 (4.2%)             | 6 (2.3%)      | Intensive care            | 0 (0.0%)             | 7 (4.3%)      | 7 (2.4%)   |
| Ophthalmology             | 6 (4.3%)         | 0 (0.0%)             | 6 (2.3%)      | Dermatology               | 4 (3.1%)             | 2 (1.2%)      | 6 (2.1%)   |
| Psychiatry                | 1 (0.7%)         | 5 (4.2%)             | 6 (2.3%)      | Nephrology                | 1 (0.8%)             | 4 (2.5%)      | 5 (1.7%)   |
| Intensive care            | 0 (0.0%)         | 3 (2.5%)             | 3 (1.2%)      | Obstetrics and Gynecology | 1 (0.8%)             | 4 (2.5%)      | 5 (1.7%)   |
| Nephrology                | 2 (1.4%)         | 1 (0.8%)             | 3 (1.2%)      | Other                     | 2 (1.5%)             | 3 (1.9%)      | 5 (1.7%)   |
| Rehabilitation            | 1 (0.7%)         | 2 (1.7%)             | 3 (1.2%)      | Geriatrics                | 0 (0.0%)             | 4 (2.5%)      | 4 (1.4%)   |
| Allergology               | 2 (1.4%)         | 0 (0.0%)             | 2 (0.8%)      | Hematology                | 2 (1.5%)             | 2 (1.2%)      | 4 (1.4%)   |
| Physiotherapy             | 0 (0.0%)         | 2 (1.7%)             | 2 (0.8%)      | Ophthalmology             | 3 (2.3%)             | 1 (0.6%)      | 4 (1.4%)   |
| Orthopedics               | 0 (0.0%)         | 2 (1.7%)             | 2 (0.8%)      | Orthopedics               | 1 (0.8%)             | 2 (1.2%)      | 3 (1.0%)   |
| Community Health          | 0 (0.0%)         | 1 (0.8%)             | 1 (0.4%)      | Community Health          | 0 (0.0%)             | 3 (1.2%)      | 1 (0.3%)   |

|                |          |          |          |                      |          |          |          |
|----------------|----------|----------|----------|----------------------|----------|----------|----------|
| Dentistry      | 1 (0.7%) | 0 (0.0%) | 1 (0.4%) | Emergency care       | 0 (0.0%) | 5 (1.2%) | 1 (0.3%) |
| Emergency care | 0 (0.0%) | 1 (0.8%) | 1 (0.4%) | Neonatology          | 1 (0.8%) | 6 (1.2%) | 1 (0.3%) |
| Geriatrics     | 0 (0.0%) | 1 (0.8%) | 1 (0.4%) | Occupational Therapy | 0 (0.0%) | 7 (1.2%) | 1 (0.3%) |
| Other          | 0 (0.0%) | 1 (0.8%) | 1 (0.4%) | Otorhinolaryngology  | 1 (0.8%) | 8 (1.2%) | 1 (0.3%) |
| Urology        | 1 (0.7%) | 0 (0.0%) | 1 (0.4%) | Rehabilitation       | 0 (0.0%) | 9 (1.2%) | 1 (0.3%) |
